# Supplementary material for: The easy-to-hard training advantage with real-world medical images
Source: Cogn Res Princ Implic. 2018 Oct 3;3:38. doi: 10.1186/s41235-018-0131-6 (PMC6168445; doi:10.1186/s41235-018-0131-6)
Supplement: Supplementary file 1 — Supplementary material experiment_2_results. (XLSX 1040 kb) [file 41235_2018_131_MOESM1_ESM.xlsx]

## Sheet: experiment_2_results
condition	participant_id	stimulus	block	trial	accuracy	category
Easy to Hard	1020	img/test/seborrheic-keratoses-27.jpg	pretest	1	0	Benign
Easy to Hard	1020	img/test/acral-lentiginous-2.gif	pretest	2	1	Melanoma
Easy to Hard	1020	img/test/acral-lentiginous-15.jpg	pretest	3	0	Melanoma
Easy to Hard	1020	img/test/seborrheic-keratoses-7.jpg	pretest	4	1	Benign
Easy to Hard	1020	img/test/nodular-34.jpg	pretest	5	1	Melanoma
Easy to Hard	1020	img/test/superficial-spreading-13.jpg	pretest	6	1	Melanoma
Easy to Hard	1020	img/test/nodular-25.jpg	pretest	7	1	Melanoma
Easy to Hard	1020	img/test/nodular-3.jpg	pretest	8	1	Melanoma
Easy to Hard	1020	img/test/superficial-spreading-22.jpg	pretest	9	0	Melanoma
Easy to Hard	1020	img/test/blue-nevus-1.jpg	pretest	10	0	Benign
Easy to Hard	1020	img/test/nodular-4.jpg	pretest	11	0	Melanoma
Easy to Hard	1020	img/test/superficial-spreading-15.jpg	pretest	12	0	Melanoma
Easy to Hard	1020	img/test/melancocytic-nevi-21.jpg	pretest	13	1	Benign
Easy to Hard	1020	img/test/seborrheic-keratoses-31.jpg	pretest	14	0	Benign
Easy to Hard	1020	img/test/superficial-spreading-39.jpg	pretest	15	1	Melanoma
Easy to Hard	1020	img/test/acral-lentiginous-34.jpg	pretest	16	0	Melanoma
Easy to Hard	1020	img/test/seborrheic-keratoses-25.jpg	pretest	17	0	Benign
Easy to Hard	1020	img/test/lentigo-magligna-19.jpg	pretest	18	0	Melanoma
Easy to Hard	1020	img/test/lentigo-8.jpg	pretest	19	1	Benign
Easy to Hard	1020	img/test/seborrheic-keratoses-17.jpg	pretest	20	0	Benign
Easy to Hard	1020	img/test/lentigo-3.jpg	pretest	21	1	Benign
Easy to Hard	1020	img/test/blue-nevus-34.jpg	pretest	22	0	Benign
Easy to Hard	1020	img/test/lentigo-26.jpg	pretest	23	0	Benign
Easy to Hard	1020	img/test/acral-lentiginous-11.jpg	pretest	24	0	Melanoma
Easy to Hard	1020	img/test/lentigo-magligna-11.jpg	pretest	25	0	Melanoma
Easy to Hard	1020	img/test/lentigo-36.jpg	pretest	26	1	Benign
Easy to Hard	1020	img/test/lentigo-magligna-18.jpg	pretest	27	1	Melanoma
Easy to Hard	1020	img/test/acral-lentiginous-6.jpg	pretest	28	1	Melanoma
Easy to Hard	1020	img/test/lentigo-magligna-22.jpg	pretest	29	1	Melanoma
Easy to Hard	1020	img/test/melancocytic-nevi-6.jpg	pretest	30	0	Benign
Easy to Hard	1020	img/test/acral-lentiginous-40.jpg	pretest	31	0	Melanoma
Easy to Hard	1020	img/test/superficial-spreading-28.jpg	pretest	32	1	Melanoma
Easy to Hard	1020	img/test/blue-nevus-4.jpg	pretest	33	1	Benign
Easy to Hard	1020	img/test/melancocytic-nevi-39.jpg	pretest	34	1	Benign
Easy to Hard	1020	img/test/blue-nevus-15.jpg	pretest	35	0	Benign
Easy to Hard	1020	img/test/superficial-spreading-31.jpg	pretest	36	0	Melanoma
Easy to Hard	1020	img/test/lentigo-magligna-24.jpg	pretest	37	0	Melanoma
Easy to Hard	1020	img/test/melancocytic-nevi-2.jpg	pretest	38	0	Benign
Easy to Hard	1020	img/test/melancocytic-nevi-14.jpg	pretest	39	1	Benign
Easy to Hard	1020	img/test/blue-nevus-12.jpg	pretest	40	0	Benign
Easy to Hard	1020	img/test/nodular-24.jpg	pretest	41	0	Melanoma
Easy to Hard	1020	img/test/lentigo-17.jpg	pretest	42	0	Benign
Easy to Hard	1020	img/test/seborrheic-keratoses-6.jpg	pretest	43	0	Benign
Easy to Hard	1020	img/test/lentigo-20.jpg	pretest	44	1	Benign
Easy to Hard	1020	img/test/melancocytic-nevi-16.jpg	pretest	45	1	Benign
Easy to Hard	1020	img/test/lentigo-magligna-5.jpg	pretest	46	1	Melanoma
Easy to Hard	1020	img/test/blue-nevus-27.jpg	pretest	47	0	Benign
Easy to Hard	1020	img/test/nodular-17.jpg	pretest	48	1	Melanoma
Easy to Hard	1020	<img src ='img/train/lentigo-magligna-10.jpg' class = 'block-center rotate270'>	Training1	1	1	Melanoma
Easy to Hard	1020	<img src ='img/train/acral-lentiginous-5.jpg' class = 'block-center rotate180'>	Training1	2	1	Melanoma
Easy to Hard	1020	<img src ='img/train/superficial-spreading-19.jpg' class = 'block-center rotate180'>	Training1	3	1	Melanoma
Easy to Hard	1020	<img src ='img/train/melancocytic-nevi-9.jpg' class = 'block-center rotate0'>	Training1	4	0	Benign
Easy to Hard	1020	<img src ='img/train/nodular-11.jpg' class = 'block-center rotate270'>	Training1	5	1	Melanoma
Easy to Hard	1020	<img src ='img/train/seborrheic-keratoses-9.jpg' class = 'block-center rotate0'>	Training1	6	1	Benign
Easy to Hard	1020	<img src ='img/train/superficial-spreading-16.jpg' class = 'block-center rotate270'>	Training1	7	0	Melanoma
Easy to Hard	1020	<img src ='img/train/acral-lentiginous-4.jpg' class = 'block-center rotate90'>	Training1	8	1	Melanoma
Easy to Hard	1020	<img src ='img/train/melancocytic-nevi-12.jpg' class = 'block-center rotate180'>	Training1	9	1	Benign
Easy to Hard	1020	<img src ='img/train/lentigo-magligna-33.jpg' class = 'block-center rotate270'>	Training1	10	1	Melanoma
Easy to Hard	1020	<img src ='img/train/nodular-8.jpg' class = 'block-center rotate180'>	Training1	11	0	Melanoma
Easy to Hard	1020	<img src ='img/train/melancocytic-nevi-20.jpg' class = 'block-center rotate0'>	Training1	12	0	Benign
Easy to Hard	1020	<img src ='img/train/superficial-spreading-1.jpg' class = 'block-center rotate0'>	Training1	13	1	Melanoma
Easy to Hard	1020	<img src ='img/train/melancocytic-nevi-4.jpg' class = 'block-center rotate0'>	Training1	14	0	Benign
Easy to Hard	1020	<img src ='img/train/seborrheic-keratoses-33.jpg' class = 'block-center rotate270'>	Training1	15	1	Benign
Easy to Hard	1020	<img src ='img/train/superficial-spreading-26.jpg' class = 'block-center rotate90'>	Training1	16	1	Melanoma
Easy to Hard	1020	<img src ='img/train/melancocytic-nevi-13.jpg' class = 'block-center rotate0'>	Training1	17	1	Benign
Easy to Hard	1020	<img src ='img/train/acral-lentiginous-37.jpg' class = 'block-center rotate180'>	Training1	18	1	Melanoma
Easy to Hard	1020	<img src ='img/train/melancocytic-nevi-3.jpg' class = 'block-center rotate0'>	Training1	19	0	Benign
Easy to Hard	1020	<img src ='img/train/seborrheic-keratoses-18.jpg' class = 'block-center rotate0'>	Training1	20	1	Benign
Easy to Hard	1020	<img src ='img/train/blue-nevus-17.jpg' class = 'block-center rotate90'>	Training1	21	0	Benign
Easy to Hard	1020	<img src ='img/train/blue-nevus-11.jpg' class = 'block-center rotate90'>	Training1	22	1	Benign
Easy to Hard	1020	<img src ='img/train/seborrheic-keratoses-10.jpg' class = 'block-center rotate0'>	Training1	23	1	Benign
Easy to Hard	1020	<img src ='img/train/seborrheic-keratoses-5.jpg' class = 'block-center rotate0'>	Training1	24	1	Benign
Easy to Hard	1020	<img src ='img/train/seborrheic-keratoses-30.jpg' class = 'block-center rotate270'>	Training1	25	1	Benign
Easy to Hard	1020	<img src ='img/train/acral-lentiginous-14.jpg' class = 'block-center rotate0'>	Training1	26	1	Melanoma
Easy to Hard	1020	<img src ='img/train/lentigo-magligna-41.jpg' class = 'block-center rotate180'>	Training1	27	1	Melanoma
Easy to Hard	1020	<img src ='img/train/blue-nevus-30.jpg' class = 'block-center rotate270'>	Training1	28	1	Benign
Easy to Hard	1020	<img src ='img/train/lentigo-magligna-1.jpg' class = 'block-center rotate0'>	Training1	29	1	Melanoma
Easy to Hard	1020	<img src ='img/train/superficial-spreading-38.jpg' class = 'block-center rotate270'>	Training1	30	1	Melanoma
Easy to Hard	1020	<img src ='img/train/seborrheic-keratoses-2.jpg' class = 'block-center rotate90'>	Training1	31	1	Benign
Easy to Hard	1020	<img src ='img/train/acral-lentiginous-20.jpg' class = 'block-center rotate270'>	Training1	32	0	Melanoma
Easy to Hard	1020	<img src ='img/train/lentigo-magligna-41.jpg' class = 'block-center rotate180'>	Training2	1	1	Melanoma
Easy to Hard	1020	<img src ='img/train/nodular-11.jpg' class = 'block-center rotate270'>	Training2	2	1	Melanoma
Easy to Hard	1020	<img src ='img/train/blue-nevus-17.jpg' class = 'block-center rotate180'>	Training2	3	1	Benign
Easy to Hard	1020	<img src ='img/train/seborrheic-keratoses-10.jpg' class = 'block-center rotate90'>	Training2	4	1	Benign
Easy to Hard	1020	<img src ='img/train/melancocytic-nevi-20.jpg' class = 'block-center rotate90'>	Training2	5	1	Benign
Easy to Hard	1020	<img src ='img/train/superficial-spreading-26.jpg' class = 'block-center rotate0'>	Training2	6	1	Melanoma
Easy to Hard	1020	<img src ='img/train/blue-nevus-11.jpg' class = 'block-center rotate270'>	Training2	7	1	Benign
Easy to Hard	1020	<img src ='img/train/acral-lentiginous-20.jpg' class = 'block-center rotate180'>	Training2	8	1	Melanoma
Easy to Hard	1020	<img src ='img/train/seborrheic-keratoses-9.jpg' class = 'block-center rotate90'>	Training2	9	1	Benign
Easy to Hard	1020	<img src ='img/train/superficial-spreading-16.jpg' class = 'block-center rotate270'>	Training2	10	1	Melanoma
Easy to Hard	1020	<img src ='img/train/acral-lentiginous-37.jpg' class = 'block-center rotate180'>	Training2	11	1	Melanoma
Easy to Hard	1020	<img src ='img/train/melancocytic-nevi-12.jpg' class = 'block-center rotate180'>	Training2	12	1	Benign
Easy to Hard	1020	<img src ='img/train/blue-nevus-30.jpg' class = 'block-center rotate270'>	Training2	13	1	Benign
Easy to Hard	1020	<img src ='img/train/lentigo-magligna-33.jpg' class = 'block-center rotate270'>	Training2	14	1	Melanoma
Easy to Hard	1020	<img src ='img/train/seborrheic-keratoses-33.jpg' class = 'block-center rotate0'>	Training2	15	1	Benign
Easy to Hard	1020	<img src ='img/train/melancocytic-nevi-3.jpg' class = 'block-center rotate90'>	Training2	16	0	Benign
Easy to Hard	1020	<img src ='img/train/nodular-8.jpg' class = 'block-center rotate180'>	Training2	17	1	Melanoma
Easy to Hard	1020	<img src ='img/train/superficial-spreading-1.jpg' class = 'block-center rotate0'>	Training2	18	1	Melanoma
Easy to Hard	1020	<img src ='img/train/seborrheic-keratoses-2.jpg' class = 'block-center rotate0'>	Training2	19	1	Benign
Easy to Hard	1020	<img src ='img/train/lentigo-magligna-10.jpg' class = 'block-center rotate180'>	Training2	20	1	Melanoma
Easy to Hard	1020	<img src ='img/train/acral-lentiginous-4.jpg' class = 'block-center rotate180'>	Training2	21	1	Melanoma
Easy to Hard	1020	<img src ='img/train/superficial-spreading-38.jpg' class = 'block-center rotate90'>	Training2	22	1	Melanoma
Easy to Hard	1020	<img src ='img/train/seborrheic-keratoses-18.jpg' class = 'block-center rotate90'>	Training2	23	1	Benign
Easy to Hard	1020	<img src ='img/train/acral-lentiginous-5.jpg' class = 'block-center rotate0'>	Training2	24	1	Melanoma
Easy to Hard	1020	<img src ='img/train/acral-lentiginous-14.jpg' class = 'block-center rotate180'>	Training2	25	1	Melanoma
Easy to Hard	1020	<img src ='img/train/melancocytic-nevi-13.jpg' class = 'block-center rotate90'>	Training2	26	1	Benign
Easy to Hard	1020	<img src ='img/train/melancocytic-nevi-9.jpg' class = 'block-center rotate180'>	Training2	27	0	Benign
Easy to Hard	1020	<img src ='img/train/superficial-spreading-19.jpg' class = 'block-center rotate0'>	Training2	28	1	Melanoma
Easy to Hard	1020	<img src ='img/train/seborrheic-keratoses-5.jpg' class = 'block-center rotate90'>	Training2	29	1	Benign
Easy to Hard	1020	<img src ='img/train/seborrheic-keratoses-30.jpg' class = 'block-center rotate0'>	Training2	30	1	Benign
Easy to Hard	1020	<img src ='img/train/melancocytic-nevi-4.jpg' class = 'block-center rotate0'>	Training2	31	1	Benign
Easy to Hard	1020	<img src ='img/train/lentigo-magligna-1.jpg' class = 'block-center rotate0'>	Training2	32	1	Melanoma
Easy to Hard	1020	<img src ='img/train/blue-nevus-30.jpg' class = 'block-center rotate270'>	Training3	1	1	Benign
Easy to Hard	1020	<img src ='img/train/seborrheic-keratoses-30.jpg' class = 'block-center rotate270'>	Training3	2	1	Benign
Easy to Hard	1020	<img src ='img/train/seborrheic-keratoses-5.jpg' class = 'block-center rotate90'>	Training3	3	1	Benign
Easy to Hard	1020	<img src ='img/train/superficial-spreading-38.jpg' class = 'block-center rotate180'>	Training3	4	1	Melanoma
Easy to Hard	1020	<img src ='img/train/acral-lentiginous-4.jpg' class = 'block-center rotate180'>	Training3	5	1	Melanoma
Easy to Hard	1020	<img src ='img/train/melancocytic-nevi-4.jpg' class = 'block-center rotate180'>	Training3	6	1	Benign
Easy to Hard	1020	<img src ='img/train/superficial-spreading-16.jpg' class = 'block-center rotate270'>	Training3	7	1	Melanoma
Easy to Hard	1020	<img src ='img/train/acral-lentiginous-14.jpg' class = 'block-center rotate0'>	Training3	8	1	Melanoma
Easy to Hard	1020	<img src ='img/train/blue-nevus-11.jpg' class = 'block-center rotate180'>	Training3	9	1	Benign
Easy to Hard	1020	<img src ='img/train/seborrheic-keratoses-33.jpg' class = 'block-center rotate90'>	Training3	10	1	Benign
Easy to Hard	1020	<img src ='img/train/melancocytic-nevi-12.jpg' class = 'block-center rotate180'>	Training3	11	1	Benign
Easy to Hard	1020	<img src ='img/train/lentigo-magligna-41.jpg' class = 'block-center rotate270'>	Training3	12	1	Melanoma
Easy to Hard	1020	<img src ='img/train/melancocytic-nevi-9.jpg' class = 'block-center rotate0'>	Training3	13	1	Benign
Easy to Hard	1020	<img src ='img/train/acral-lentiginous-5.jpg' class = 'block-center rotate0'>	Training3	14	1	Melanoma
Easy to Hard	1020	<img src ='img/train/superficial-spreading-1.jpg' class = 'block-center rotate270'>	Training3	15	1	Melanoma
Easy to Hard	1020	<img src ='img/train/seborrheic-keratoses-18.jpg' class = 'block-center rotate90'>	Training3	16	1	Benign
Easy to Hard	1020	<img src ='img/train/melancocytic-nevi-13.jpg' class = 'block-center rotate90'>	Training3	17	1	Benign
Easy to Hard	1020	<img src ='img/train/seborrheic-keratoses-10.jpg' class = 'block-center rotate90'>	Training3	18	1	Benign
Easy to Hard	1020	<img src ='img/train/nodular-8.jpg' class = 'block-center rotate90'>	Training3	19	1	Melanoma
Easy to Hard	1020	<img src ='img/train/lentigo-magligna-10.jpg' class = 'block-center rotate270'>	Training3	20	1	Melanoma
Easy to Hard	1020	<img src ='img/train/superficial-spreading-26.jpg' class = 'block-center rotate0'>	Training3	21	1	Melanoma
Easy to Hard	1020	<img src ='img/train/lentigo-magligna-1.jpg' class = 'block-center rotate0'>	Training3	22	1	Melanoma
Easy to Hard	1020	<img src ='img/train/melancocytic-nevi-20.jpg' class = 'block-center rotate180'>	Training3	23	1	Benign
Easy to Hard	1020	<img src ='img/train/melancocytic-nevi-3.jpg' class = 'block-center rotate180'>	Training3	24	1	Benign
Easy to Hard	1020	<img src ='img/train/nodular-11.jpg' class = 'block-center rotate270'>	Training3	25	1	Melanoma
Easy to Hard	1020	<img src ='img/train/seborrheic-keratoses-2.jpg' class = 'block-center rotate90'>	Training3	26	1	Benign
Easy to Hard	1020	<img src ='img/train/acral-lentiginous-37.jpg' class = 'block-center rotate270'>	Training3	27	1	Melanoma
Easy to Hard	1020	<img src ='img/train/acral-lentiginous-20.jpg' class = 'block-center rotate0'>	Training3	28	1	Melanoma
Easy to Hard	1020	<img src ='img/train/seborrheic-keratoses-9.jpg' class = 'block-center rotate270'>	Training3	29	1	Benign
Easy to Hard	1020	<img src ='img/train/superficial-spreading-19.jpg' class = 'block-center rotate90'>	Training3	30	1	Melanoma
Easy to Hard	1020	<img src ='img/train/blue-nevus-17.jpg' class = 'block-center rotate0'>	Training3	31	1	Benign
Easy to Hard	1020	<img src ='img/train/lentigo-magligna-33.jpg' class = 'block-center rotate90'>	Training3	32	1	Melanoma
Easy to Hard	1020	<img src ='img/train/melancocytic-nevi-9.jpg' class = 'block-center rotate90'>	Training4	1	1	Benign
Easy to Hard	1020	<img src ='img/train/seborrheic-keratoses-18.jpg' class = 'block-center rotate90'>	Training4	2	1	Benign
Easy to Hard	1020	<img src ='img/train/superficial-spreading-19.jpg' class = 'block-center rotate90'>	Training4	3	1	Melanoma
Easy to Hard	1020	<img src ='img/train/melancocytic-nevi-3.jpg' class = 'block-center rotate0'>	Training4	4	1	Benign
Easy to Hard	1020	<img src ='img/train/seborrheic-keratoses-9.jpg' class = 'block-center rotate180'>	Training4	5	1	Benign
Easy to Hard	1020	<img src ='img/train/acral-lentiginous-20.jpg' class = 'block-center rotate180'>	Training4	6	1	Melanoma
Easy to Hard	1020	<img src ='img/train/lentigo-magligna-10.jpg' class = 'block-center rotate180'>	Training4	7	1	Melanoma
Easy to Hard	1020	<img src ='img/train/melancocytic-nevi-20.jpg' class = 'block-center rotate0'>	Training4	8	1	Benign
Easy to Hard	1020	<img src ='img/train/blue-nevus-11.jpg' class = 'block-center rotate0'>	Training4	9	1	Benign
Easy to Hard	1020	<img src ='img/train/melancocytic-nevi-4.jpg' class = 'block-center rotate270'>	Training4	10	1	Benign
Easy to Hard	1020	<img src ='img/train/seborrheic-keratoses-30.jpg' class = 'block-center rotate180'>	Training4	11	1	Benign
Easy to Hard	1020	<img src ='img/train/acral-lentiginous-37.jpg' class = 'block-center rotate90'>	Training4	12	1	Melanoma
Easy to Hard	1020	<img src ='img/train/melancocytic-nevi-13.jpg' class = 'block-center rotate0'>	Training4	13	1	Benign
Easy to Hard	1020	<img src ='img/train/superficial-spreading-1.jpg' class = 'block-center rotate270'>	Training4	14	1	Melanoma
Easy to Hard	1020	<img src ='img/train/nodular-8.jpg' class = 'block-center rotate180'>	Training4	15	1	Melanoma
Easy to Hard	1020	<img src ='img/train/nodular-11.jpg' class = 'block-center rotate0'>	Training4	16	1	Melanoma
Easy to Hard	1020	<img src ='img/train/blue-nevus-30.jpg' class = 'block-center rotate0'>	Training4	17	1	Benign
Easy to Hard	1020	<img src ='img/train/seborrheic-keratoses-5.jpg' class = 'block-center rotate180'>	Training4	18	1	Benign
Easy to Hard	1020	<img src ='img/train/seborrheic-keratoses-33.jpg' class = 'block-center rotate90'>	Training4	19	1	Benign
Easy to Hard	1020	<img src ='img/train/superficial-spreading-26.jpg' class = 'block-center rotate270'>	Training4	20	1	Melanoma
Easy to Hard	1020	<img src ='img/train/seborrheic-keratoses-2.jpg' class = 'block-center rotate0'>	Training4	21	1	Benign
Easy to Hard	1020	<img src ='img/train/lentigo-magligna-1.jpg' class = 'block-center rotate270'>	Training4	22	1	Melanoma
Easy to Hard	1020	<img src ='img/train/melancocytic-nevi-12.jpg' class = 'block-center rotate180'>	Training4	23	1	Benign
Easy to Hard	1020	<img src ='img/train/acral-lentiginous-4.jpg' class = 'block-center rotate270'>	Training4	24	1	Melanoma
Easy to Hard	1020	<img src ='img/train/lentigo-magligna-41.jpg' class = 'block-center rotate180'>	Training4	25	1	Melanoma
Easy to Hard	1020	<img src ='img/train/superficial-spreading-38.jpg' class = 'block-center rotate0'>	Training4	26	1	Melanoma
Easy to Hard	1020	<img src ='img/train/seborrheic-keratoses-10.jpg' class = 'block-center rotate180'>	Training4	27	1	Benign
Easy to Hard	1020	<img src ='img/train/lentigo-magligna-33.jpg' class = 'block-center rotate180'>	Training4	28	1	Melanoma
Easy to Hard	1020	<img src ='img/train/blue-nevus-17.jpg' class = 'block-center rotate180'>	Training4	29	1	Benign
Easy to Hard	1020	<img src ='img/train/acral-lentiginous-5.jpg' class = 'block-center rotate270'>	Training4	30	1	Melanoma
Easy to Hard	1020	<img src ='img/train/superficial-spreading-16.jpg' class = 'block-center rotate90'>	Training4	31	1	Melanoma
Easy to Hard	1020	<img src ='img/train/acral-lentiginous-14.jpg' class = 'block-center rotate0'>	Training4	32	1	Melanoma
Easy to Hard	1020	<img src ='img/train/blue-nevus-2.jpg' class = 'block-center rotate270'>	Training5	1	0	Benign
Easy to Hard	1020	<img src ='img/train/lentigo-27.jpg' class = 'block-center rotate90'>	Training5	2	0	Benign
Easy to Hard	1020	<img src ='img/train/seborrheic-keratoses-1.jpg' class = 'block-center rotate180'>	Training5	3	0	Benign
Easy to Hard	1020	<img src ='img/train/lentigo-28.jpg' class = 'block-center rotate180'>	Training5	4	1	Benign
Easy to Hard	1020	<img src ='img/train/lentigo-23.jpg' class = 'block-center rotate0'>	Training5	5	0	Benign
Easy to Hard	1020	<img src ='img/train/superficial-spreading-8.jpg' class = 'block-center rotate90'>	Training5	6	1	Melanoma
Easy to Hard	1020	<img src ='img/train/lentigo-magligna-14.jpg' class = 'block-center rotate270'>	Training5	7	1	Melanoma
Easy to Hard	1020	<img src ='img/train/melancocytic-nevi-37.jpg' class = 'block-center rotate270'>	Training5	8	1	Benign
Easy to Hard	1020	<img src ='img/train/lentigo-magligna-36.jpg' class = 'block-center rotate180'>	Training5	9	1	Melanoma
Easy to Hard	1020	<img src ='img/train/superficial-spreading-7.jpg' class = 'block-center rotate90'>	Training5	10	1	Melanoma
Easy to Hard	1020	<img src ='img/train/superficial-spreading-9.png' class = 'block-center rotate180'>	Training5	11	1	Melanoma
Easy to Hard	1020	<img src ='img/train/superficial-spreading-2.jpg' class = 'block-center rotate90'>	Training5	12	1	Melanoma
Easy to Hard	1020	<img src ='img/train/lentigo-6.jpg' class = 'block-center rotate270'>	Training5	13	0	Benign
Easy to Hard	1020	<img src ='img/train/acral-lentiginous-24.jpg' class = 'block-center rotate270'>	Training5	14	1	Melanoma
Easy to Hard	1020	<img src ='img/train/blue-nevus-21.jpg' class = 'block-center rotate90'>	Training5	15	1	Benign
Easy to Hard	1020	<img src ='img/train/acral-lentiginous-22.jpg' class = 'block-center rotate180'>	Training5	16	1	Melanoma
Easy to Hard	1020	<img src ='img/train/lentigo-13.jpg' class = 'block-center rotate90'>	Training5	17	1	Benign
Easy to Hard	1020	<img src ='img/train/melancocytic-nevi-30.jpg' class = 'block-center rotate180'>	Training5	18	1	Benign
Easy to Hard	1020	<img src ='img/train/melancocytic-nevi-1.jpg' class = 'block-center rotate180'>	Training5	19	1	Benign
Easy to Hard	1020	<img src ='img/train/seborrheic-keratoses-13.jpg' class = 'block-center rotate180'>	Training5	20	1	Benign
Easy to Hard	1020	<img src ='img/train/nodular-1.jpg' class = 'block-center rotate0'>	Training5	21	0	Melanoma
Easy to Hard	1020	<img src ='img/train/blue-nevus-29.jpg' class = 'block-center rotate270'>	Training5	22	1	Benign
Easy to Hard	1020	<img src ='img/train/lentigo-33.jpg' class = 'block-center rotate0'>	Training5	23	0	Benign
Easy to Hard	1020	<img src ='img/train/nodular-35.jpg' class = 'block-center rotate270'>	Training5	24	1	Melanoma
Easy to Hard	1020	<img src ='img/train/acral-lentiginous-16.jpg' class = 'block-center rotate270'>	Training5	25	1	Melanoma
Easy to Hard	1020	<img src ='img/train/superficial-spreading-40.jpg' class = 'block-center rotate0'>	Training5	26	1	Melanoma
Easy to Hard	1020	<img src ='img/train/melancocytic-nevi-17.jpg' class = 'block-center rotate0'>	Training5	27	1	Benign
Easy to Hard	1020	<img src ='img/train/nodular-27.jpg' class = 'block-center rotate180'>	Training5	28	0	Melanoma
Easy to Hard	1020	<img src ='img/train/lentigo-magligna-15.jpg' class = 'block-center rotate0'>	Training5	29	1	Melanoma
Easy to Hard	1020	<img src ='img/train/lentigo-magligna-6.jpg' class = 'block-center rotate0'>	Training5	30	1	Melanoma
Easy to Hard	1020	<img src ='img/train/acral-lentiginous-28.jpg' class = 'block-center rotate90'>	Training5	31	1	Melanoma
Easy to Hard	1020	<img src ='img/train/blue-nevus-7.jpg' class = 'block-center rotate90'>	Training5	32	1	Benign
Easy to Hard	1020	<img src ='img/train/acral-lentiginous-24.jpg' class = 'block-center rotate270'>	Training6	1	1	Melanoma
Easy to Hard	1020	<img src ='img/train/nodular-27.jpg' class = 'block-center rotate0'>	Training6	2	1	Melanoma
Easy to Hard	1020	<img src ='img/train/superficial-spreading-40.jpg' class = 'block-center rotate270'>	Training6	3	1	Melanoma
Easy to Hard	1020	<img src ='img/train/melancocytic-nevi-30.jpg' class = 'block-center rotate180'>	Training6	4	1	Benign
Easy to Hard	1020	<img src ='img/train/melancocytic-nevi-1.jpg' class = 'block-center rotate270'>	Training6	5	0	Benign
Easy to Hard	1020	<img src ='img/train/lentigo-magligna-36.jpg' class = 'block-center rotate180'>	Training6	6	1	Melanoma
Easy to Hard	1020	<img src ='img/train/lentigo-27.jpg' class = 'block-center rotate90'>	Training6	7	1	Benign
Easy to Hard	1020	<img src ='img/train/blue-nevus-29.jpg' class = 'block-center rotate180'>	Training6	8	1	Benign
Easy to Hard	1020	<img src ='img/train/blue-nevus-7.jpg' class = 'block-center rotate0'>	Training6	9	1	Benign
Easy to Hard	1020	<img src ='img/train/nodular-1.jpg' class = 'block-center rotate270'>	Training6	10	1	Melanoma
Easy to Hard	1020	<img src ='img/train/lentigo-23.jpg' class = 'block-center rotate180'>	Training6	11	0	Benign
Easy to Hard	1020	<img src ='img/train/lentigo-magligna-14.jpg' class = 'block-center rotate0'>	Training6	12	1	Melanoma
Easy to Hard	1020	<img src ='img/train/acral-lentiginous-28.jpg' class = 'block-center rotate0'>	Training6	13	1	Melanoma
Easy to Hard	1020	<img src ='img/train/superficial-spreading-9.png' class = 'block-center rotate0'>	Training6	14	0	Melanoma
Easy to Hard	1020	<img src ='img/train/seborrheic-keratoses-13.jpg' class = 'block-center rotate270'>	Training6	15	1	Benign
Easy to Hard	1020	<img src ='img/train/blue-nevus-2.jpg' class = 'block-center rotate0'>	Training6	16	1	Benign
Easy to Hard	1020	<img src ='img/train/melancocytic-nevi-37.jpg' class = 'block-center rotate270'>	Training6	17	1	Benign
Easy to Hard	1020	<img src ='img/train/lentigo-magligna-6.jpg' class = 'block-center rotate270'>	Training6	18	1	Melanoma
Easy to Hard	1020	<img src ='img/train/lentigo-6.jpg' class = 'block-center rotate0'>	Training6	19	1	Benign
Easy to Hard	1020	<img src ='img/train/melancocytic-nevi-17.jpg' class = 'block-center rotate90'>	Training6	20	0	Benign
Easy to Hard	1020	<img src ='img/train/superficial-spreading-2.jpg' class = 'block-center rotate0'>	Training6	21	1	Melanoma
Easy to Hard	1020	<img src ='img/train/blue-nevus-21.jpg' class = 'block-center rotate0'>	Training6	22	1	Benign
Easy to Hard	1020	<img src ='img/train/acral-lentiginous-16.jpg' class = 'block-center rotate180'>	Training6	23	1	Melanoma
Easy to Hard	1020	<img src ='img/train/lentigo-33.jpg' class = 'block-center rotate0'>	Training6	24	0	Benign
Easy to Hard	1020	<img src ='img/train/lentigo-28.jpg' class = 'block-center rotate0'>	Training6	25	1	Benign
Easy to Hard	1020	<img src ='img/train/lentigo-13.jpg' class = 'block-center rotate270'>	Training6	26	1	Benign
Easy to Hard	1020	<img src ='img/train/acral-lentiginous-22.jpg' class = 'block-center rotate0'>	Training6	27	1	Melanoma
Easy to Hard	1020	<img src ='img/train/superficial-spreading-8.jpg' class = 'block-center rotate270'>	Training6	28	1	Melanoma
Easy to Hard	1020	<img src ='img/train/nodular-35.jpg' class = 'block-center rotate90'>	Training6	29	1	Melanoma
Easy to Hard	1020	<img src ='img/train/seborrheic-keratoses-1.jpg' class = 'block-center rotate180'>	Training6	30	0	Benign
Easy to Hard	1020	<img src ='img/train/lentigo-magligna-15.jpg' class = 'block-center rotate270'>	Training6	31	1	Melanoma
Easy to Hard	1020	<img src ='img/train/superficial-spreading-7.jpg' class = 'block-center rotate0'>	Training6	32	0	Melanoma
Easy to Hard	1020	<img src ='img/train/superficial-spreading-7.jpg' class = 'block-center rotate180'>	Training7	1	1	Melanoma
Easy to Hard	1020	<img src ='img/train/melancocytic-nevi-17.jpg' class = 'block-center rotate270'>	Training7	2	0	Benign
Easy to Hard	1020	<img src ='img/train/superficial-spreading-8.jpg' class = 'block-center rotate180'>	Training7	3	1	Melanoma
Easy to Hard	1020	<img src ='img/train/lentigo-6.jpg' class = 'block-center rotate0'>	Training7	4	1	Benign
Easy to Hard	1020	<img src ='img/train/blue-nevus-2.jpg' class = 'block-center rotate0'>	Training7	5	1	Benign
Easy to Hard	1020	<img src ='img/train/lentigo-28.jpg' class = 'block-center rotate0'>	Training7	6	1	Benign
Easy to Hard	1020	<img src ='img/train/seborrheic-keratoses-1.jpg' class = 'block-center rotate180'>	Training7	7	0	Benign
Easy to Hard	1020	<img src ='img/train/lentigo-33.jpg' class = 'block-center rotate0'>	Training7	8	1	Benign
Easy to Hard	1020	<img src ='img/train/blue-nevus-7.jpg' class = 'block-center rotate270'>	Training7	9	1	Benign
Easy to Hard	1020	<img src ='img/train/lentigo-magligna-14.jpg' class = 'block-center rotate90'>	Training7	10	1	Melanoma
Easy to Hard	1020	<img src ='img/train/melancocytic-nevi-37.jpg' class = 'block-center rotate270'>	Training7	11	1	Benign
Easy to Hard	1020	<img src ='img/train/blue-nevus-21.jpg' class = 'block-center rotate0'>	Training7	12	1	Benign
Easy to Hard	1020	<img src ='img/train/melancocytic-nevi-30.jpg' class = 'block-center rotate180'>	Training7	13	1	Benign
Easy to Hard	1020	<img src ='img/train/acral-lentiginous-16.jpg' class = 'block-center rotate270'>	Training7	14	1	Melanoma
Easy to Hard	1020	<img src ='img/train/nodular-27.jpg' class = 'block-center rotate270'>	Training7	15	1	Melanoma
Easy to Hard	1020	<img src ='img/train/acral-lentiginous-28.jpg' class = 'block-center rotate270'>	Training7	16	1	Melanoma
Easy to Hard	1020	<img src ='img/train/lentigo-27.jpg' class = 'block-center rotate270'>	Training7	17	1	Benign
Easy to Hard	1020	<img src ='img/train/superficial-spreading-40.jpg' class = 'block-center rotate90'>	Training7	18	1	Melanoma
Easy to Hard	1020	<img src ='img/train/blue-nevus-29.jpg' class = 'block-center rotate270'>	Training7	19	1	Benign
Easy to Hard	1020	<img src ='img/train/acral-lentiginous-24.jpg' class = 'block-center rotate180'>	Training7	20	1	Melanoma
Easy to Hard	1020	<img src ='img/train/nodular-1.jpg' class = 'block-center rotate270'>	Training7	21	1	Melanoma
Easy to Hard	1020	<img src ='img/train/melancocytic-nevi-1.jpg' class = 'block-center rotate270'>	Training7	22	1	Benign
Easy to Hard	1020	<img src ='img/train/lentigo-magligna-6.jpg' class = 'block-center rotate90'>	Training7	23	1	Melanoma
Easy to Hard	1020	<img src ='img/train/nodular-35.jpg' class = 'block-center rotate90'>	Training7	24	1	Melanoma
Easy to Hard	1020	<img src ='img/train/lentigo-23.jpg' class = 'block-center rotate180'>	Training7	25	1	Benign
Easy to Hard	1020	<img src ='img/train/acral-lentiginous-22.jpg' class = 'block-center rotate180'>	Training7	26	1	Melanoma
Easy to Hard	1020	<img src ='img/train/seborrheic-keratoses-13.jpg' class = 'block-center rotate90'>	Training7	27	1	Benign
Easy to Hard	1020	<img src ='img/train/lentigo-13.jpg' class = 'block-center rotate90'>	Training7	28	1	Benign
Easy to Hard	1020	<img src ='img/train/lentigo-magligna-36.jpg' class = 'block-center rotate90'>	Training7	29	1	Melanoma
Easy to Hard	1020	<img src ='img/train/lentigo-magligna-15.jpg' class = 'block-center rotate0'>	Training7	30	1	Melanoma
Easy to Hard	1020	<img src ='img/train/superficial-spreading-9.png' class = 'block-center rotate180'>	Training7	31	1	Melanoma
Easy to Hard	1020	<img src ='img/train/superficial-spreading-2.jpg' class = 'block-center rotate90'>	Training7	32	1	Melanoma
Easy to Hard	1020	<img src ='img/train/superficial-spreading-9.png' class = 'block-center rotate90'>	Training8	1	1	Melanoma
Easy to Hard	1020	<img src ='img/train/lentigo-33.jpg' class = 'block-center rotate90'>	Training8	2	1	Benign
Easy to Hard	1020	<img src ='img/train/superficial-spreading-8.jpg' class = 'block-center rotate180'>	Training8	3	1	Melanoma
Easy to Hard	1020	<img src ='img/train/blue-nevus-2.jpg' class = 'block-center rotate270'>	Training8	4	1	Benign
Easy to Hard	1020	<img src ='img/train/lentigo-6.jpg' class = 'block-center rotate270'>	Training8	5	1	Benign
Easy to Hard	1020	<img src ='img/train/superficial-spreading-40.jpg' class = 'block-center rotate180'>	Training8	6	1	Melanoma
Easy to Hard	1020	<img src ='img/train/seborrheic-keratoses-1.jpg' class = 'block-center rotate270'>	Training8	7	0	Benign
Easy to Hard	1020	<img src ='img/train/superficial-spreading-7.jpg' class = 'block-center rotate270'>	Training8	8	1	Melanoma
Easy to Hard	1020	<img src ='img/train/nodular-1.jpg' class = 'block-center rotate90'>	Training8	9	1	Melanoma
Easy to Hard	1020	<img src ='img/train/lentigo-23.jpg' class = 'block-center rotate180'>	Training8	10	1	Benign
Easy to Hard	1020	<img src ='img/train/lentigo-27.jpg' class = 'block-center rotate270'>	Training8	11	1	Benign
Easy to Hard	1020	<img src ='img/train/melancocytic-nevi-1.jpg' class = 'block-center rotate180'>	Training8	12	1	Benign
Easy to Hard	1020	<img src ='img/train/lentigo-13.jpg' class = 'block-center rotate0'>	Training8	13	1	Benign
Easy to Hard	1020	<img src ='img/train/acral-lentiginous-22.jpg' class = 'block-center rotate180'>	Training8	14	1	Melanoma
Easy to Hard	1020	<img src ='img/train/melancocytic-nevi-30.jpg' class = 'block-center rotate0'>	Training8	15	1	Benign
Easy to Hard	1020	<img src ='img/train/lentigo-magligna-14.jpg' class = 'block-center rotate270'>	Training8	16	1	Melanoma
Easy to Hard	1020	<img src ='img/train/nodular-35.jpg' class = 'block-center rotate90'>	Training8	17	1	Melanoma
Easy to Hard	1020	<img src ='img/train/lentigo-magligna-6.jpg' class = 'block-center rotate90'>	Training8	18	1	Melanoma
Easy to Hard	1020	<img src ='img/train/acral-lentiginous-28.jpg' class = 'block-center rotate0'>	Training8	19	1	Melanoma
Easy to Hard	1020	<img src ='img/train/seborrheic-keratoses-13.jpg' class = 'block-center rotate90'>	Training8	20	1	Benign
Easy to Hard	1020	<img src ='img/train/lentigo-magligna-15.jpg' class = 'block-center rotate180'>	Training8	21	1	Melanoma
Easy to Hard	1020	<img src ='img/train/acral-lentiginous-16.jpg' class = 'block-center rotate0'>	Training8	22	1	Melanoma
Easy to Hard	1020	<img src ='img/train/blue-nevus-21.jpg' class = 'block-center rotate270'>	Training8	23	1	Benign
Easy to Hard	1020	<img src ='img/train/blue-nevus-7.jpg' class = 'block-center rotate180'>	Training8	24	1	Benign
Easy to Hard	1020	<img src ='img/train/melancocytic-nevi-37.jpg' class = 'block-center rotate90'>	Training8	25	1	Benign
Easy to Hard	1020	<img src ='img/train/lentigo-28.jpg' class = 'block-center rotate90'>	Training8	26	1	Benign
Easy to Hard	1020	<img src ='img/train/lentigo-magligna-36.jpg' class = 'block-center rotate0'>	Training8	27	1	Melanoma
Easy to Hard	1020	<img src ='img/train/acral-lentiginous-24.jpg' class = 'block-center rotate270'>	Training8	28	1	Melanoma
Easy to Hard	1020	<img src ='img/train/nodular-27.jpg' class = 'block-center rotate180'>	Training8	29	1	Melanoma
Easy to Hard	1020	<img src ='img/train/superficial-spreading-2.jpg' class = 'block-center rotate180'>	Training8	30	1	Melanoma
Easy to Hard	1020	<img src ='img/train/melancocytic-nevi-17.jpg' class = 'block-center rotate90'>	Training8	31	0	Benign
Easy to Hard	1020	<img src ='img/train/blue-nevus-29.jpg' class = 'block-center rotate90'>	Training8	32	1	Benign
Easy to Hard	1020	<img src ='img/train/lentigo-magligna-7.jpg' class = 'block-center rotate270'>	Training9	1	0	Melanoma
Easy to Hard	1020	<img src ='img/train/melancocytic-nevi-38.jpg' class = 'block-center rotate180'>	Training9	2	0	Benign
Easy to Hard	1020	<img src ='img/train/nodular-16.jpg' class = 'block-center rotate270'>	Training9	3	0	Melanoma
Easy to Hard	1020	<img src ='img/train/nodular-23.jpg' class = 'block-center rotate270'>	Training9	4	0	Melanoma
Easy to Hard	1020	<img src ='img/train/nodular-41.jpg' class = 'block-center rotate90'>	Training9	5	1	Melanoma
Easy to Hard	1020	<img src ='img/train/superficial-spreading-23.jpg' class = 'block-center rotate90'>	Training9	6	1	Melanoma
Easy to Hard	1020	<img src ='img/train/superficial-spreading-14.jpg' class = 'block-center rotate270'>	Training9	7	1	Melanoma
Easy to Hard	1020	<img src ='img/train/lentigo-4.jpg' class = 'block-center rotate90'>	Training9	8	0	Benign
Easy to Hard	1020	<img src ='img/train/acral-lentiginous-3.jpg' class = 'block-center rotate0'>	Training9	9	1	Melanoma
Easy to Hard	1020	<img src ='img/train/seborrheic-keratoses-32.png' class = 'block-center rotate180'>	Training9	10	0	Benign
Easy to Hard	1020	<img src ='img/train/blue-nevus-36.jpg' class = 'block-center rotate0'>	Training9	11	0	Benign
Easy to Hard	1020	<img src ='img/train/acral-lentiginous-8.jpg' class = 'block-center rotate0'>	Training9	12	1	Melanoma
Easy to Hard	1020	<img src ='img/train/lentigo-magligna-40.jpg' class = 'block-center rotate180'>	Training9	13	0	Melanoma
Easy to Hard	1020	<img src ='img/train/lentigo-magligna-32.jpg' class = 'block-center rotate90'>	Training9	14	1	Melanoma
Easy to Hard	1020	<img src ='img/train/lentigo-31.jpg' class = 'block-center rotate180'>	Training9	15	0	Benign
Easy to Hard	1020	<img src ='img/train/lentigo-12.jpg' class = 'block-center rotate270'>	Training9	16	0	Benign
Easy to Hard	1020	<img src ='img/train/blue-nevus-32.jpg' class = 'block-center rotate90'>	Training9	17	1	Benign
Easy to Hard	1020	<img src ='img/train/nodular-5.jpg' class = 'block-center rotate0'>	Training9	18	0	Melanoma
Easy to Hard	1020	<img src ='img/train/lentigo-34.jpg' class = 'block-center rotate90'>	Training9	19	0	Benign
Easy to Hard	1020	<img src ='img/train/blue-nevus-8.jpg' class = 'block-center rotate90'>	Training9	20	0	Benign
Easy to Hard	1020	<img src ='img/train/seborrheic-keratoses-37.jpg' class = 'block-center rotate180'>	Training9	21	0	Benign
Easy to Hard	1020	<img src ='img/train/melancocytic-nevi-5.jpg' class = 'block-center rotate180'>	Training9	22	0	Benign
Easy to Hard	1020	<img src ='img/train/blue-nevus-33.jpg' class = 'block-center rotate0'>	Training9	23	0	Benign
Easy to Hard	1020	<img src ='img/train/lentigo-magligna-37.jpg' class = 'block-center rotate270'>	Training9	24	1	Melanoma
Easy to Hard	1020	<img src ='img/train/lentigo-32.jpg' class = 'block-center rotate180'>	Training9	25	0	Benign
Easy to Hard	1020	<img src ='img/train/nodular-37.jpg' class = 'block-center rotate180'>	Training9	26	1	Melanoma
Easy to Hard	1020	<img src ='img/train/nodular-21.jpg' class = 'block-center rotate180'>	Training9	27	1	Melanoma
Easy to Hard	1020	<img src ='img/train/seborrheic-keratoses-28.jpg' class = 'block-center rotate180'>	Training9	28	0	Benign
Easy to Hard	1020	<img src ='img/train/lentigo-14.jpg' class = 'block-center rotate270'>	Training9	29	1	Benign
Easy to Hard	1020	<img src ='img/train/blue-nevus-18.jpg' class = 'block-center rotate0'>	Training9	30	0	Benign
Easy to Hard	1020	<img src ='img/train/nodular-40.jpg' class = 'block-center rotate270'>	Training9	31	0	Melanoma
Easy to Hard	1020	<img src ='img/train/acral-lentiginous-29.jpg' class = 'block-center rotate90'>	Training9	32	1	Melanoma
Easy to Hard	1020	<img src ='img/train/nodular-37.jpg' class = 'block-center rotate0'>	Training10	1	0	Melanoma
Easy to Hard	1020	<img src ='img/train/nodular-16.jpg' class = 'block-center rotate90'>	Training10	2	0	Melanoma
Easy to Hard	1020	<img src ='img/train/seborrheic-keratoses-37.jpg' class = 'block-center rotate0'>	Training10	3	1	Benign
Easy to Hard	1020	<img src ='img/train/lentigo-magligna-40.jpg' class = 'block-center rotate0'>	Training10	4	0	Melanoma
Easy to Hard	1020	<img src ='img/train/superficial-spreading-23.jpg' class = 'block-center rotate180'>	Training10	5	1	Melanoma
Easy to Hard	1020	<img src ='img/train/nodular-5.jpg' class = 'block-center rotate180'>	Training10	6	1	Melanoma
Easy to Hard	1020	<img src ='img/train/lentigo-31.jpg' class = 'block-center rotate270'>	Training10	7	0	Benign
Easy to Hard	1020	<img src ='img/train/acral-lentiginous-8.jpg' class = 'block-center rotate270'>	Training10	8	1	Melanoma
Easy to Hard	1020	<img src ='img/train/acral-lentiginous-29.jpg' class = 'block-center rotate90'>	Training10	9	1	Melanoma
Easy to Hard	1020	<img src ='img/train/lentigo-32.jpg' class = 'block-center rotate0'>	Training10	10	1	Benign
Easy to Hard	1020	<img src ='img/train/lentigo-magligna-37.jpg' class = 'block-center rotate0'>	Training10	11	0	Melanoma
Easy to Hard	1020	<img src ='img/train/melancocytic-nevi-38.jpg' class = 'block-center rotate270'>	Training10	12	1	Benign
Easy to Hard	1020	<img src ='img/train/nodular-41.jpg' class = 'block-center rotate180'>	Training10	13	1	Melanoma
Easy to Hard	1020	<img src ='img/train/superficial-spreading-14.jpg' class = 'block-center rotate270'>	Training10	14	0	Melanoma
Easy to Hard	1020	<img src ='img/train/nodular-23.jpg' class = 'block-center rotate90'>	Training10	15	0	Melanoma
Easy to Hard	1020	<img src ='img/train/lentigo-12.jpg' class = 'block-center rotate180'>	Training10	16	1	Benign
Easy to Hard	1020	<img src ='img/train/blue-nevus-8.jpg' class = 'block-center rotate180'>	Training10	17	1	Benign
Easy to Hard	1020	<img src ='img/train/nodular-40.jpg' class = 'block-center rotate270'>	Training10	18	0	Melanoma
Easy to Hard	1020	<img src ='img/train/blue-nevus-33.jpg' class = 'block-center rotate270'>	Training10	19	0	Benign
Easy to Hard	1020	<img src ='img/train/blue-nevus-32.jpg' class = 'block-center rotate0'>	Training10	20	1	Benign
Easy to Hard	1020	<img src ='img/train/seborrheic-keratoses-32.png' class = 'block-center rotate270'>	Training10	21	1	Benign
Easy to Hard	1020	<img src ='img/train/lentigo-14.jpg' class = 'block-center rotate90'>	Training10	22	1	Benign
Easy to Hard	1020	<img src ='img/train/nodular-21.jpg' class = 'block-center rotate90'>	Training10	23	1	Melanoma
Easy to Hard	1020	<img src ='img/train/blue-nevus-36.jpg' class = 'block-center rotate90'>	Training10	24	0	Benign
Easy to Hard	1020	<img src ='img/train/acral-lentiginous-3.jpg' class = 'block-center rotate90'>	Training10	25	1	Melanoma
Easy to Hard	1020	<img src ='img/train/lentigo-34.jpg' class = 'block-center rotate270'>	Training10	26	1	Benign
Easy to Hard	1020	<img src ='img/train/blue-nevus-18.jpg' class = 'block-center rotate180'>	Training10	27	0	Benign
Easy to Hard	1020	<img src ='img/train/lentigo-magligna-7.jpg' class = 'block-center rotate180'>	Training10	28	0	Melanoma
Easy to Hard	1020	<img src ='img/train/lentigo-magligna-32.jpg' class = 'block-center rotate0'>	Training10	29	1	Melanoma
Easy to Hard	1020	<img src ='img/train/seborrheic-keratoses-28.jpg' class = 'block-center rotate180'>	Training10	30	1	Benign
Easy to Hard	1020	<img src ='img/train/lentigo-4.jpg' class = 'block-center rotate270'>	Training10	31	0	Benign
Easy to Hard	1020	<img src ='img/train/melancocytic-nevi-5.jpg' class = 'block-center rotate0'>	Training10	32	1	Benign
Easy to Hard	1020	<img src ='img/train/lentigo-magligna-7.jpg' class = 'block-center rotate270'>	Training11	1	1	Melanoma
Easy to Hard	1020	<img src ='img/train/lentigo-12.jpg' class = 'block-center rotate180'>	Training11	2	1	Benign
Easy to Hard	1020	<img src ='img/train/nodular-40.jpg' class = 'block-center rotate180'>	Training11	3	0	Melanoma
Easy to Hard	1020	<img src ='img/train/nodular-23.jpg' class = 'block-center rotate0'>	Training11	4	0	Melanoma
Easy to Hard	1020	<img src ='img/train/lentigo-magligna-40.jpg' class = 'block-center rotate180'>	Training11	5	0	Melanoma
Easy to Hard	1020	<img src ='img/train/lentigo-magligna-37.jpg' class = 'block-center rotate270'>	Training11	6	0	Melanoma
Easy to Hard	1020	<img src ='img/train/lentigo-4.jpg' class = 'block-center rotate180'>	Training11	7	1	Benign
Easy to Hard	1020	<img src ='img/train/nodular-5.jpg' class = 'block-center rotate0'>	Training11	8	1	Melanoma
Easy to Hard	1020	<img src ='img/train/superficial-spreading-23.jpg' class = 'block-center rotate180'>	Training11	9	1	Melanoma
Easy to Hard	1020	<img src ='img/train/nodular-21.jpg' class = 'block-center rotate0'>	Training11	10	1	Melanoma
Easy to Hard	1020	<img src ='img/train/acral-lentiginous-8.jpg' class = 'block-center rotate90'>	Training11	11	1	Melanoma
Easy to Hard	1020	<img src ='img/train/melancocytic-nevi-5.jpg' class = 'block-center rotate270'>	Training11	12	0	Benign
Easy to Hard	1020	<img src ='img/train/lentigo-14.jpg' class = 'block-center rotate90'>	Training11	13	0	Benign
Easy to Hard	1020	<img src ='img/train/seborrheic-keratoses-28.jpg' class = 'block-center rotate180'>	Training11	14	1	Benign
Easy to Hard	1020	<img src ='img/train/lentigo-31.jpg' class = 'block-center rotate0'>	Training11	15	0	Benign
Easy to Hard	1020	<img src ='img/train/lentigo-32.jpg' class = 'block-center rotate90'>	Training11	16	1	Benign
Easy to Hard	1020	<img src ='img/train/superficial-spreading-14.jpg' class = 'block-center rotate180'>	Training11	17	0	Melanoma
Easy to Hard	1020	<img src ='img/train/blue-nevus-32.jpg' class = 'block-center rotate180'>	Training11	18	1	Benign
Easy to Hard	1020	<img src ='img/train/blue-nevus-8.jpg' class = 'block-center rotate180'>	Training11	19	0	Benign
Easy to Hard	1020	<img src ='img/train/lentigo-34.jpg' class = 'block-center rotate180'>	Training11	20	1	Benign
Easy to Hard	1020	<img src ='img/train/acral-lentiginous-29.jpg' class = 'block-center rotate180'>	Training11	21	1	Melanoma
Easy to Hard	1020	<img src ='img/train/blue-nevus-33.jpg' class = 'block-center rotate180'>	Training11	22	1	Benign
Easy to Hard	1020	<img src ='img/train/seborrheic-keratoses-32.png' class = 'block-center rotate90'>	Training11	23	0	Benign
Easy to Hard	1020	<img src ='img/train/seborrheic-keratoses-37.jpg' class = 'block-center rotate90'>	Training11	24	1	Benign
Easy to Hard	1020	<img src ='img/train/blue-nevus-18.jpg' class = 'block-center rotate0'>	Training11	25	1	Benign
Easy to Hard	1020	<img src ='img/train/blue-nevus-36.jpg' class = 'block-center rotate180'>	Training11	26	0	Benign
Easy to Hard	1020	<img src ='img/train/nodular-37.jpg' class = 'block-center rotate90'>	Training11	27	0	Melanoma
Easy to Hard	1020	<img src ='img/train/nodular-41.jpg' class = 'block-center rotate180'>	Training11	28	1	Melanoma
Easy to Hard	1020	<img src ='img/train/acral-lentiginous-3.jpg' class = 'block-center rotate180'>	Training11	29	1	Melanoma
Easy to Hard	1020	<img src ='img/train/nodular-16.jpg' class = 'block-center rotate0'>	Training11	30	0	Melanoma
Easy to Hard	1020	<img src ='img/train/lentigo-magligna-32.jpg' class = 'block-center rotate270'>	Training11	31	0	Melanoma
Easy to Hard	1020	<img src ='img/train/melancocytic-nevi-38.jpg' class = 'block-center rotate0'>	Training11	32	1	Benign
Easy to Hard	1020	<img src ='img/train/seborrheic-keratoses-28.jpg' class = 'block-center rotate180'>	Training12	1	1	Benign
Easy to Hard	1020	<img src ='img/train/superficial-spreading-23.jpg' class = 'block-center rotate0'>	Training12	2	1	Melanoma
Easy to Hard	1020	<img src ='img/train/lentigo-31.jpg' class = 'block-center rotate0'>	Training12	3	1	Benign
Easy to Hard	1020	<img src ='img/train/blue-nevus-18.jpg' class = 'block-center rotate180'>	Training12	4	1	Benign
Easy to Hard	1020	<img src ='img/train/nodular-21.jpg' class = 'block-center rotate0'>	Training12	5	1	Melanoma
Easy to Hard	1020	<img src ='img/train/blue-nevus-33.jpg' class = 'block-center rotate90'>	Training12	6	1	Benign
Easy to Hard	1020	<img src ='img/train/blue-nevus-8.jpg' class = 'block-center rotate270'>	Training12	7	1	Benign
Easy to Hard	1020	<img src ='img/train/acral-lentiginous-3.jpg' class = 'block-center rotate180'>	Training12	8	1	Melanoma
Easy to Hard	1020	<img src ='img/train/blue-nevus-32.jpg' class = 'block-center rotate270'>	Training12	9	1	Benign
Easy to Hard	1020	<img src ='img/train/nodular-37.jpg' class = 'block-center rotate180'>	Training12	10	1	Melanoma
Easy to Hard	1020	<img src ='img/train/melancocytic-nevi-5.jpg' class = 'block-center rotate270'>	Training12	11	1	Benign
Easy to Hard	1020	<img src ='img/train/nodular-5.jpg' class = 'block-center rotate0'>	Training12	12	0	Melanoma
Easy to Hard	1020	<img src ='img/train/lentigo-14.jpg' class = 'block-center rotate270'>	Training12	13	1	Benign
Easy to Hard	1020	<img src ='img/train/blue-nevus-36.jpg' class = 'block-center rotate180'>	Training12	14	0	Benign
Easy to Hard	1020	<img src ='img/train/superficial-spreading-14.jpg' class = 'block-center rotate90'>	Training12	15	1	Melanoma
Easy to Hard	1020	<img src ='img/train/lentigo-magligna-40.jpg' class = 'block-center rotate90'>	Training12	16	0	Melanoma
Easy to Hard	1020	<img src ='img/train/lentigo-magligna-7.jpg' class = 'block-center rotate180'>	Training12	17	0	Melanoma
Easy to Hard	1020	<img src ='img/train/nodular-16.jpg' class = 'block-center rotate180'>	Training12	18	1	Melanoma
Easy to Hard	1020	<img src ='img/train/nodular-40.jpg' class = 'block-center rotate270'>	Training12	19	0	Melanoma
Easy to Hard	1020	<img src ='img/train/seborrheic-keratoses-32.png' class = 'block-center rotate270'>	Training12	20	1	Benign
Easy to Hard	1020	<img src ='img/train/nodular-41.jpg' class = 'block-center rotate270'>	Training12	21	1	Melanoma
Easy to Hard	1020	<img src ='img/train/melancocytic-nevi-38.jpg' class = 'block-center rotate0'>	Training12	22	1	Benign
Easy to Hard	1020	<img src ='img/train/lentigo-magligna-37.jpg' class = 'block-center rotate0'>	Training12	23	1	Melanoma
Easy to Hard	1020	<img src ='img/train/lentigo-magligna-32.jpg' class = 'block-center rotate270'>	Training12	24	1	Melanoma
Easy to Hard	1020	<img src ='img/train/lentigo-4.jpg' class = 'block-center rotate90'>	Training12	25	1	Benign
Easy to Hard	1020	<img src ='img/train/lentigo-12.jpg' class = 'block-center rotate270'>	Training12	26	0	Benign
Easy to Hard	1020	<img src ='img/train/acral-lentiginous-29.jpg' class = 'block-center rotate0'>	Training12	27	1	Melanoma
Easy to Hard	1020	<img src ='img/train/lentigo-34.jpg' class = 'block-center rotate0'>	Training12	28	1	Benign
Easy to Hard	1020	<img src ='img/train/seborrheic-keratoses-37.jpg' class = 'block-center rotate270'>	Training12	29	0	Benign
Easy to Hard	1020	<img src ='img/train/acral-lentiginous-8.jpg' class = 'block-center rotate90'>	Training12	30	1	Melanoma
Easy to Hard	1020	<img src ='img/train/lentigo-32.jpg' class = 'block-center rotate270'>	Training12	31	1	Benign
Easy to Hard	1020	<img src ='img/train/nodular-23.jpg' class = 'block-center rotate270'>	Training12	32	0	Melanoma
Easy to Hard	1020	img/test/seborrheic-keratoses-27.jpg	posttest	1	1	Benign
Easy to Hard	1020	img/test/acral-lentiginous-2.gif	posttest	2	1	Melanoma
Easy to Hard	1020	img/test/acral-lentiginous-15.jpg	posttest	3	1	Melanoma
Easy to Hard	1020	img/test/seborrheic-keratoses-7.jpg	posttest	4	1	Benign
Easy to Hard	1020	img/test/nodular-34.jpg	posttest	5	1	Melanoma
Easy to Hard	1020	img/test/superficial-spreading-13.jpg	posttest	6	0	Melanoma
Easy to Hard	1020	img/test/nodular-25.jpg	posttest	7	0	Melanoma
Easy to Hard	1020	img/test/nodular-3.jpg	posttest	8	1	Melanoma
Easy to Hard	1020	img/test/superficial-spreading-22.jpg	posttest	9	1	Melanoma
Easy to Hard	1020	img/test/blue-nevus-1.jpg	posttest	10	1	Benign
Easy to Hard	1020	img/test/nodular-4.jpg	posttest	11	0	Melanoma
Easy to Hard	1020	img/test/superficial-spreading-15.jpg	posttest	12	0	Melanoma
Easy to Hard	1020	img/test/melancocytic-nevi-21.jpg	posttest	13	0	Benign
Easy to Hard	1020	img/test/seborrheic-keratoses-31.jpg	posttest	14	0	Benign
Easy to Hard	1020	img/test/superficial-spreading-39.jpg	posttest	15	0	Melanoma
Easy to Hard	1020	img/test/acral-lentiginous-34.jpg	posttest	16	1	Melanoma
Easy to Hard	1020	img/test/seborrheic-keratoses-25.jpg	posttest	17	1	Benign
Easy to Hard	1020	img/test/lentigo-magligna-19.jpg	posttest	18	1	Melanoma
Easy to Hard	1020	img/test/lentigo-8.jpg	posttest	19	1	Benign
Easy to Hard	1020	img/test/seborrheic-keratoses-17.jpg	posttest	20	0	Benign
Easy to Hard	1020	img/test/lentigo-3.jpg	posttest	21	0	Benign
Easy to Hard	1020	img/test/blue-nevus-34.jpg	posttest	22	1	Benign
Easy to Hard	1020	img/test/lentigo-26.jpg	posttest	23	0	Benign
Easy to Hard	1020	img/test/acral-lentiginous-11.jpg	posttest	24	1	Melanoma
Easy to Hard	1020	img/test/lentigo-magligna-11.jpg	posttest	25	1	Melanoma
Easy to Hard	1020	img/test/lentigo-36.jpg	posttest	26	1	Benign
Easy to Hard	1020	img/test/lentigo-magligna-18.jpg	posttest	27	1	Melanoma
Easy to Hard	1020	img/test/acral-lentiginous-6.jpg	posttest	28	1	Melanoma
Easy to Hard	1020	img/test/lentigo-magligna-22.jpg	posttest	29	1	Melanoma
Easy to Hard	1020	img/test/melancocytic-nevi-6.jpg	posttest	30	0	Benign
Easy to Hard	1020	img/test/acral-lentiginous-40.jpg	posttest	31	1	Melanoma
Easy to Hard	1020	img/test/superficial-spreading-28.jpg	posttest	32	1	Melanoma
Easy to Hard	1020	img/test/blue-nevus-4.jpg	posttest	33	1	Benign
Easy to Hard	1020	img/test/melancocytic-nevi-39.jpg	posttest	34	1	Benign
Easy to Hard	1020	img/test/blue-nevus-15.jpg	posttest	35	0	Benign
Easy to Hard	1020	img/test/superficial-spreading-31.jpg	posttest	36	1	Melanoma
Easy to Hard	1020	img/test/lentigo-magligna-24.jpg	posttest	37	0	Melanoma
Easy to Hard	1020	img/test/melancocytic-nevi-2.jpg	posttest	38	1	Benign
Easy to Hard	1020	img/test/melancocytic-nevi-14.jpg	posttest	39	0	Benign
Easy to Hard	1020	img/test/blue-nevus-12.jpg	posttest	40	1	Benign
Easy to Hard	1020	img/test/nodular-24.jpg	posttest	41	0	Melanoma
Easy to Hard	1020	img/test/lentigo-17.jpg	posttest	42	0	Benign
Easy to Hard	1020	img/test/seborrheic-keratoses-6.jpg	posttest	43	0	Benign
Easy to Hard	1020	img/test/lentigo-20.jpg	posttest	44	1	Benign
Easy to Hard	1020	img/test/melancocytic-nevi-16.jpg	posttest	45	1	Benign
Easy to Hard	1020	img/test/lentigo-magligna-5.jpg	posttest	46	1	Melanoma
Easy to Hard	1020	img/test/blue-nevus-27.jpg	posttest	47	1	Benign
Easy to Hard	1020	img/test/nodular-17.jpg	posttest	48	0	Melanoma
Hard to Easy	2014	img/test/blue-nevus-34.jpg	pretest	1	0	Benign
Hard to Easy	2014	img/test/lentigo-magligna-11.jpg	pretest	2	1	Melanoma
Hard to Easy	2014	img/test/melancocytic-nevi-14.jpg	pretest	3	1	Benign
Hard to Easy	2014	img/test/superficial-spreading-28.jpg	pretest	4	1	Melanoma
Hard to Easy	2014	img/test/lentigo-26.jpg	pretest	5	1	Benign
Hard to Easy	2014	img/test/seborrheic-keratoses-17.jpg	pretest	6	0	Benign
Hard to Easy	2014	img/test/blue-nevus-4.jpg	pretest	7	0	Benign
Hard to Easy	2014	img/test/blue-nevus-15.jpg	pretest	8	1	Benign
Hard to Easy	2014	img/test/melancocytic-nevi-16.jpg	pretest	9	1	Benign
Hard to Easy	2014	img/test/acral-lentiginous-11.jpg	pretest	10	0	Melanoma
Hard to Easy	2014	img/test/acral-lentiginous-40.jpg	pretest	11	0	Melanoma
Hard to Easy	2014	img/test/lentigo-magligna-19.jpg	pretest	12	0	Melanoma
Hard to Easy	2014	img/test/seborrheic-keratoses-27.jpg	pretest	13	0	Benign
Hard to Easy	2014	img/test/superficial-spreading-22.jpg	pretest	14	0	Melanoma
Hard to Easy	2014	img/test/melancocytic-nevi-39.jpg	pretest	15	1	Benign
Hard to Easy	2014	img/test/lentigo-magligna-22.jpg	pretest	16	1	Melanoma
Hard to Easy	2014	img/test/acral-lentiginous-6.jpg	pretest	17	0	Melanoma
Hard to Easy	2014	img/test/lentigo-20.jpg	pretest	18	1	Benign
Hard to Easy	2014	img/test/seborrheic-keratoses-7.jpg	pretest	19	0	Benign
Hard to Easy	2014	img/test/nodular-3.jpg	pretest	20	1	Melanoma
Hard to Easy	2014	img/test/melancocytic-nevi-2.jpg	pretest	21	1	Benign
Hard to Easy	2014	img/test/acral-lentiginous-15.jpg	pretest	22	0	Melanoma
Hard to Easy	2014	img/test/melancocytic-nevi-6.jpg	pretest	23	1	Benign
Hard to Easy	2014	img/test/superficial-spreading-13.jpg	pretest	24	1	Melanoma
Hard to Easy	2014	img/test/superficial-spreading-31.jpg	pretest	25	0	Melanoma
Hard to Easy	2014	img/test/nodular-25.jpg	pretest	26	1	Melanoma
Hard to Easy	2014	img/test/seborrheic-keratoses-25.jpg	pretest	27	0	Benign
Hard to Easy	2014	img/test/acral-lentiginous-34.jpg	pretest	28	0	Melanoma
Hard to Easy	2014	img/test/nodular-34.jpg	pretest	29	1	Melanoma
Hard to Easy	2014	img/test/seborrheic-keratoses-6.jpg	pretest	30	0	Benign
Hard to Easy	2014	img/test/superficial-spreading-15.jpg	pretest	31	1	Melanoma
Hard to Easy	2014	img/test/nodular-24.jpg	pretest	32	0	Melanoma
Hard to Easy	2014	img/test/blue-nevus-1.jpg	pretest	33	1	Benign
Hard to Easy	2014	img/test/melancocytic-nevi-21.jpg	pretest	34	1	Benign
Hard to Easy	2014	img/test/lentigo-36.jpg	pretest	35	1	Benign
Hard to Easy	2014	img/test/blue-nevus-27.jpg	pretest	36	0	Benign
Hard to Easy	2014	img/test/seborrheic-keratoses-31.jpg	pretest	37	0	Benign
Hard to Easy	2014	img/test/nodular-4.jpg	pretest	38	1	Melanoma
Hard to Easy	2014	img/test/acral-lentiginous-2.gif	pretest	39	1	Melanoma
Hard to Easy	2014	img/test/superficial-spreading-39.jpg	pretest	40	1	Melanoma
Hard to Easy	2014	img/test/lentigo-17.jpg	pretest	41	0	Benign
Hard to Easy	2014	img/test/lentigo-3.jpg	pretest	42	1	Benign
Hard to Easy	2014	img/test/lentigo-magligna-18.jpg	pretest	43	0	Melanoma
Hard to Easy	2014	img/test/lentigo-8.jpg	pretest	44	1	Benign
Hard to Easy	2014	img/test/nodular-17.jpg	pretest	45	1	Melanoma
Hard to Easy	2014	img/test/lentigo-magligna-5.jpg	pretest	46	0	Melanoma
Hard to Easy	2014	img/test/lentigo-magligna-24.jpg	pretest	47	0	Melanoma
Hard to Easy	2014	img/test/blue-nevus-12.jpg	pretest	48	0	Benign
Hard to Easy	2014	<img src ='img/train/lentigo-magligna-32.jpg' class = 'block-center rotate0'>	Training1	1	0	Melanoma
Hard to Easy	2014	<img src ='img/train/superficial-spreading-14.jpg' class = 'block-center rotate180'>	Training1	2	1	Melanoma
Hard to Easy	2014	<img src ='img/train/lentigo-12.jpg' class = 'block-center rotate270'>	Training1	3	0	Benign
Hard to Easy	2014	<img src ='img/train/nodular-5.jpg' class = 'block-center rotate0'>	Training1	4	1	Melanoma
Hard to Easy	2014	<img src ='img/train/lentigo-magligna-40.jpg' class = 'block-center rotate0'>	Training1	5	0	Melanoma
Hard to Easy	2014	<img src ='img/train/nodular-21.jpg' class = 'block-center rotate180'>	Training1	6	0	Melanoma
Hard to Easy	2014	<img src ='img/train/nodular-16.jpg' class = 'block-center rotate0'>	Training1	7	1	Melanoma
Hard to Easy	2014	<img src ='img/train/nodular-41.jpg' class = 'block-center rotate90'>	Training1	8	1	Melanoma
Hard to Easy	2014	<img src ='img/train/nodular-23.jpg' class = 'block-center rotate180'>	Training1	9	1	Melanoma
Hard to Easy	2014	<img src ='img/train/blue-nevus-18.jpg' class = 'block-center rotate270'>	Training1	10	0	Benign
Hard to Easy	2014	<img src ='img/train/acral-lentiginous-8.jpg' class = 'block-center rotate270'>	Training1	11	1	Melanoma
Hard to Easy	2014	<img src ='img/train/acral-lentiginous-29.jpg' class = 'block-center rotate180'>	Training1	12	1	Melanoma
Hard to Easy	2014	<img src ='img/train/blue-nevus-8.jpg' class = 'block-center rotate0'>	Training1	13	0	Benign
Hard to Easy	2014	<img src ='img/train/lentigo-32.jpg' class = 'block-center rotate180'>	Training1	14	0	Benign
Hard to Easy	2014	<img src ='img/train/blue-nevus-33.jpg' class = 'block-center rotate180'>	Training1	15	0	Benign
Hard to Easy	2014	<img src ='img/train/seborrheic-keratoses-28.jpg' class = 'block-center rotate270'>	Training1	16	0	Benign
Hard to Easy	2014	<img src ='img/train/seborrheic-keratoses-32.png' class = 'block-center rotate180'>	Training1	17	0	Benign
Hard to Easy	2014	<img src ='img/train/nodular-40.jpg' class = 'block-center rotate270'>	Training1	18	0	Melanoma
Hard to Easy	2014	<img src ='img/train/acral-lentiginous-3.jpg' class = 'block-center rotate180'>	Training1	19	1	Melanoma
Hard to Easy	2014	<img src ='img/train/melancocytic-nevi-38.jpg' class = 'block-center rotate90'>	Training1	20	0	Benign
Hard to Easy	2014	<img src ='img/train/lentigo-magligna-7.jpg' class = 'block-center rotate270'>	Training1	21	1	Melanoma
Hard to Easy	2014	<img src ='img/train/lentigo-34.jpg' class = 'block-center rotate180'>	Training1	22	0	Benign
Hard to Easy	2014	<img src ='img/train/blue-nevus-32.jpg' class = 'block-center rotate270'>	Training1	23	0	Benign
Hard to Easy	2014	<img src ='img/train/lentigo-31.jpg' class = 'block-center rotate180'>	Training1	24	0	Benign
Hard to Easy	2014	<img src ='img/train/melancocytic-nevi-5.jpg' class = 'block-center rotate180'>	Training1	25	0	Benign
Hard to Easy	2014	<img src ='img/train/seborrheic-keratoses-37.jpg' class = 'block-center rotate0'>	Training1	26	0	Benign
Hard to Easy	2014	<img src ='img/train/superficial-spreading-23.jpg' class = 'block-center rotate180'>	Training1	27	0	Melanoma
Hard to Easy	2014	<img src ='img/train/nodular-37.jpg' class = 'block-center rotate180'>	Training1	28	0	Melanoma
Hard to Easy	2014	<img src ='img/train/lentigo-14.jpg' class = 'block-center rotate0'>	Training1	29	0	Benign
Hard to Easy	2014	<img src ='img/train/blue-nevus-36.jpg' class = 'block-center rotate0'>	Training1	30	0	Benign
Hard to Easy	2014	<img src ='img/train/lentigo-4.jpg' class = 'block-center rotate270'>	Training1	31	0	Benign
Hard to Easy	2014	<img src ='img/train/lentigo-magligna-37.jpg' class = 'block-center rotate270'>	Training1	32	0	Melanoma
Hard to Easy	2014	<img src ='img/train/acral-lentiginous-3.jpg' class = 'block-center rotate90'>	Training2	1	1	Melanoma
Hard to Easy	2014	<img src ='img/train/blue-nevus-32.jpg' class = 'block-center rotate270'>	Training2	2	1	Benign
Hard to Easy	2014	<img src ='img/train/lentigo-12.jpg' class = 'block-center rotate270'>	Training2	3	1	Benign
Hard to Easy	2014	<img src ='img/train/nodular-5.jpg' class = 'block-center rotate90'>	Training2	4	1	Melanoma
Hard to Easy	2014	<img src ='img/train/superficial-spreading-14.jpg' class = 'block-center rotate0'>	Training2	5	0	Melanoma
Hard to Easy	2014	<img src ='img/train/seborrheic-keratoses-28.jpg' class = 'block-center rotate270'>	Training2	6	0	Benign
Hard to Easy	2014	<img src ='img/train/lentigo-4.jpg' class = 'block-center rotate270'>	Training2	7	1	Benign
Hard to Easy	2014	<img src ='img/train/lentigo-34.jpg' class = 'block-center rotate270'>	Training2	8	0	Benign
Hard to Easy	2014	<img src ='img/train/lentigo-magligna-32.jpg' class = 'block-center rotate270'>	Training2	9	1	Melanoma
Hard to Easy	2014	<img src ='img/train/lentigo-magligna-37.jpg' class = 'block-center rotate180'>	Training2	10	1	Melanoma
Hard to Easy	2014	<img src ='img/train/blue-nevus-8.jpg' class = 'block-center rotate90'>	Training2	11	1	Benign
Hard to Easy	2014	<img src ='img/train/blue-nevus-18.jpg' class = 'block-center rotate180'>	Training2	12	1	Benign
Hard to Easy	2014	<img src ='img/train/lentigo-magligna-40.jpg' class = 'block-center rotate90'>	Training2	13	1	Melanoma
Hard to Easy	2014	<img src ='img/train/blue-nevus-36.jpg' class = 'block-center rotate90'>	Training2	14	1	Benign
Hard to Easy	2014	<img src ='img/train/nodular-21.jpg' class = 'block-center rotate270'>	Training2	15	1	Melanoma
Hard to Easy	2014	<img src ='img/train/nodular-16.jpg' class = 'block-center rotate270'>	Training2	16	1	Melanoma
Hard to Easy	2014	<img src ='img/train/seborrheic-keratoses-37.jpg' class = 'block-center rotate180'>	Training2	17	0	Benign
Hard to Easy	2014	<img src ='img/train/lentigo-31.jpg' class = 'block-center rotate0'>	Training2	18	0	Benign
Hard to Easy	2014	<img src ='img/train/nodular-40.jpg' class = 'block-center rotate180'>	Training2	19	1	Melanoma
Hard to Easy	2014	<img src ='img/train/nodular-41.jpg' class = 'block-center rotate270'>	Training2	20	1	Melanoma
Hard to Easy	2014	<img src ='img/train/blue-nevus-33.jpg' class = 'block-center rotate90'>	Training2	21	1	Benign
Hard to Easy	2014	<img src ='img/train/acral-lentiginous-8.jpg' class = 'block-center rotate0'>	Training2	22	1	Melanoma
Hard to Easy	2014	<img src ='img/train/lentigo-magligna-7.jpg' class = 'block-center rotate270'>	Training2	23	1	Melanoma
Hard to Easy	2014	<img src ='img/train/acral-lentiginous-29.jpg' class = 'block-center rotate270'>	Training2	24	1	Melanoma
Hard to Easy	2014	<img src ='img/train/nodular-37.jpg' class = 'block-center rotate0'>	Training2	25	1	Melanoma
Hard to Easy	2014	<img src ='img/train/lentigo-32.jpg' class = 'block-center rotate180'>	Training2	26	1	Benign
Hard to Easy	2014	<img src ='img/train/superficial-spreading-23.jpg' class = 'block-center rotate270'>	Training2	27	1	Melanoma
Hard to Easy	2014	<img src ='img/train/nodular-23.jpg' class = 'block-center rotate270'>	Training2	28	0	Melanoma
Hard to Easy	2014	<img src ='img/train/melancocytic-nevi-38.jpg' class = 'block-center rotate0'>	Training2	29	0	Benign
Hard to Easy	2014	<img src ='img/train/melancocytic-nevi-5.jpg' class = 'block-center rotate180'>	Training2	30	0	Benign
Hard to Easy	2014	<img src ='img/train/seborrheic-keratoses-32.png' class = 'block-center rotate90'>	Training2	31	0	Benign
Hard to Easy	2014	<img src ='img/train/lentigo-14.jpg' class = 'block-center rotate90'>	Training2	32	1	Benign
Hard to Easy	2014	<img src ='img/train/lentigo-31.jpg' class = 'block-center rotate270'>	Training3	1	0	Benign
Hard to Easy	2014	<img src ='img/train/melancocytic-nevi-38.jpg' class = 'block-center rotate0'>	Training3	2	0	Benign
Hard to Easy	2014	<img src ='img/train/lentigo-32.jpg' class = 'block-center rotate270'>	Training3	3	1	Benign
Hard to Easy	2014	<img src ='img/train/lentigo-12.jpg' class = 'block-center rotate180'>	Training3	4	1	Benign
Hard to Easy	2014	<img src ='img/train/nodular-40.jpg' class = 'block-center rotate90'>	Training3	5	1	Melanoma
Hard to Easy	2014	<img src ='img/train/acral-lentiginous-8.jpg' class = 'block-center rotate270'>	Training3	6	0	Melanoma
Hard to Easy	2014	<img src ='img/train/nodular-21.jpg' class = 'block-center rotate90'>	Training3	7	1	Melanoma
Hard to Easy	2014	<img src ='img/train/blue-nevus-33.jpg' class = 'block-center rotate90'>	Training3	8	0	Benign
Hard to Easy	2014	<img src ='img/train/blue-nevus-32.jpg' class = 'block-center rotate270'>	Training3	9	1	Benign
Hard to Easy	2014	<img src ='img/train/acral-lentiginous-29.jpg' class = 'block-center rotate0'>	Training3	10	1	Melanoma
Hard to Easy	2014	<img src ='img/train/seborrheic-keratoses-32.png' class = 'block-center rotate270'>	Training3	11	0	Benign
Hard to Easy	2014	<img src ='img/train/lentigo-magligna-37.jpg' class = 'block-center rotate270'>	Training3	12	1	Melanoma
Hard to Easy	2014	<img src ='img/train/blue-nevus-8.jpg' class = 'block-center rotate180'>	Training3	13	1	Benign
Hard to Easy	2014	<img src ='img/train/lentigo-4.jpg' class = 'block-center rotate270'>	Training3	14	0	Benign
Hard to Easy	2014	<img src ='img/train/lentigo-magligna-40.jpg' class = 'block-center rotate270'>	Training3	15	1	Melanoma
Hard to Easy	2014	<img src ='img/train/nodular-5.jpg' class = 'block-center rotate0'>	Training3	16	0	Melanoma
Hard to Easy	2014	<img src ='img/train/acral-lentiginous-3.jpg' class = 'block-center rotate180'>	Training3	17	1	Melanoma
Hard to Easy	2014	<img src ='img/train/blue-nevus-36.jpg' class = 'block-center rotate180'>	Training3	18	1	Benign
Hard to Easy	2014	<img src ='img/train/lentigo-magligna-7.jpg' class = 'block-center rotate180'>	Training3	19	1	Melanoma
Hard to Easy	2014	<img src ='img/train/nodular-37.jpg' class = 'block-center rotate0'>	Training3	20	1	Melanoma
Hard to Easy	2014	<img src ='img/train/blue-nevus-18.jpg' class = 'block-center rotate270'>	Training3	21	1	Benign
Hard to Easy	2014	<img src ='img/train/lentigo-34.jpg' class = 'block-center rotate90'>	Training3	22	1	Benign
Hard to Easy	2014	<img src ='img/train/seborrheic-keratoses-37.jpg' class = 'block-center rotate180'>	Training3	23	0	Benign
Hard to Easy	2014	<img src ='img/train/melancocytic-nevi-5.jpg' class = 'block-center rotate0'>	Training3	24	0	Benign
Hard to Easy	2014	<img src ='img/train/superficial-spreading-23.jpg' class = 'block-center rotate180'>	Training3	25	1	Melanoma
Hard to Easy	2014	<img src ='img/train/nodular-41.jpg' class = 'block-center rotate180'>	Training3	26	1	Melanoma
Hard to Easy	2014	<img src ='img/train/nodular-16.jpg' class = 'block-center rotate90'>	Training3	27	1	Melanoma
Hard to Easy	2014	<img src ='img/train/superficial-spreading-14.jpg' class = 'block-center rotate0'>	Training3	28	0	Melanoma
Hard to Easy	2014	<img src ='img/train/lentigo-magligna-32.jpg' class = 'block-center rotate270'>	Training3	29	0	Melanoma
Hard to Easy	2014	<img src ='img/train/seborrheic-keratoses-28.jpg' class = 'block-center rotate180'>	Training3	30	0	Benign
Hard to Easy	2014	<img src ='img/train/nodular-23.jpg' class = 'block-center rotate90'>	Training3	31	0	Melanoma
Hard to Easy	2014	<img src ='img/train/lentigo-14.jpg' class = 'block-center rotate270'>	Training3	32	0	Benign
Hard to Easy	2014	<img src ='img/train/lentigo-magligna-32.jpg' class = 'block-center rotate90'>	Training4	1	1	Melanoma
Hard to Easy	2014	<img src ='img/train/nodular-16.jpg' class = 'block-center rotate90'>	Training4	2	1	Melanoma
Hard to Easy	2014	<img src ='img/train/seborrheic-keratoses-32.png' class = 'block-center rotate90'>	Training4	3	0	Benign
Hard to Easy	2014	<img src ='img/train/acral-lentiginous-3.jpg' class = 'block-center rotate0'>	Training4	4	1	Melanoma
Hard to Easy	2014	<img src ='img/train/blue-nevus-36.jpg' class = 'block-center rotate270'>	Training4	5	1	Benign
Hard to Easy	2014	<img src ='img/train/blue-nevus-8.jpg' class = 'block-center rotate180'>	Training4	6	1	Benign
Hard to Easy	2014	<img src ='img/train/seborrheic-keratoses-28.jpg' class = 'block-center rotate90'>	Training4	7	1	Benign
Hard to Easy	2014	<img src ='img/train/lentigo-4.jpg' class = 'block-center rotate0'>	Training4	8	0	Benign
Hard to Easy	2014	<img src ='img/train/nodular-41.jpg' class = 'block-center rotate270'>	Training4	9	1	Melanoma
Hard to Easy	2014	<img src ='img/train/acral-lentiginous-29.jpg' class = 'block-center rotate270'>	Training4	10	0	Melanoma
Hard to Easy	2014	<img src ='img/train/acral-lentiginous-8.jpg' class = 'block-center rotate0'>	Training4	11	1	Melanoma
Hard to Easy	2014	<img src ='img/train/superficial-spreading-23.jpg' class = 'block-center rotate180'>	Training4	12	1	Melanoma
Hard to Easy	2014	<img src ='img/train/seborrheic-keratoses-37.jpg' class = 'block-center rotate0'>	Training4	13	1	Benign
Hard to Easy	2014	<img src ='img/train/nodular-23.jpg' class = 'block-center rotate270'>	Training4	14	0	Melanoma
Hard to Easy	2014	<img src ='img/train/lentigo-12.jpg' class = 'block-center rotate90'>	Training4	15	1	Benign
Hard to Easy	2014	<img src ='img/train/blue-nevus-33.jpg' class = 'block-center rotate0'>	Training4	16	0	Benign
Hard to Easy	2014	<img src ='img/train/blue-nevus-18.jpg' class = 'block-center rotate90'>	Training4	17	1	Benign
Hard to Easy	2014	<img src ='img/train/lentigo-magligna-7.jpg' class = 'block-center rotate0'>	Training4	18	0	Melanoma
Hard to Easy	2014	<img src ='img/train/lentigo-magligna-37.jpg' class = 'block-center rotate0'>	Training4	19	1	Melanoma
Hard to Easy	2014	<img src ='img/train/nodular-5.jpg' class = 'block-center rotate0'>	Training4	20	1	Melanoma
Hard to Easy	2014	<img src ='img/train/lentigo-magligna-40.jpg' class = 'block-center rotate0'>	Training4	21	1	Melanoma
Hard to Easy	2014	<img src ='img/train/nodular-37.jpg' class = 'block-center rotate270'>	Training4	22	1	Melanoma
Hard to Easy	2014	<img src ='img/train/lentigo-32.jpg' class = 'block-center rotate0'>	Training4	23	1	Benign
Hard to Easy	2014	<img src ='img/train/lentigo-31.jpg' class = 'block-center rotate90'>	Training4	24	1	Benign
Hard to Easy	2014	<img src ='img/train/nodular-21.jpg' class = 'block-center rotate0'>	Training4	25	1	Melanoma
Hard to Easy	2014	<img src ='img/train/melancocytic-nevi-38.jpg' class = 'block-center rotate270'>	Training4	26	0	Benign
Hard to Easy	2014	<img src ='img/train/blue-nevus-32.jpg' class = 'block-center rotate180'>	Training4	27	0	Benign
Hard to Easy	2014	<img src ='img/train/lentigo-34.jpg' class = 'block-center rotate0'>	Training4	28	1	Benign
Hard to Easy	2014	<img src ='img/train/melancocytic-nevi-5.jpg' class = 'block-center rotate180'>	Training4	29	0	Benign
Hard to Easy	2014	<img src ='img/train/superficial-spreading-14.jpg' class = 'block-center rotate270'>	Training4	30	1	Melanoma
Hard to Easy	2014	<img src ='img/train/lentigo-14.jpg' class = 'block-center rotate0'>	Training4	31	0	Benign
Hard to Easy	2014	<img src ='img/train/nodular-40.jpg' class = 'block-center rotate0'>	Training4	32	1	Melanoma
Hard to Easy	2014	<img src ='img/train/blue-nevus-21.jpg' class = 'block-center rotate180'>	Training5	1	0	Benign
Hard to Easy	2014	<img src ='img/train/melancocytic-nevi-30.jpg' class = 'block-center rotate90'>	Training5	2	0	Benign
Hard to Easy	2014	<img src ='img/train/lentigo-13.jpg' class = 'block-center rotate270'>	Training5	3	0	Benign
Hard to Easy	2014	<img src ='img/train/lentigo-33.jpg' class = 'block-center rotate90'>	Training5	4	1	Benign
Hard to Easy	2014	<img src ='img/train/blue-nevus-2.jpg' class = 'block-center rotate90'>	Training5	5	0	Benign
Hard to Easy	2014	<img src ='img/train/seborrheic-keratoses-1.jpg' class = 'block-center rotate0'>	Training5	6	0	Benign
Hard to Easy	2014	<img src ='img/train/lentigo-magligna-36.jpg' class = 'block-center rotate90'>	Training5	7	0	Melanoma
Hard to Easy	2014	<img src ='img/train/melancocytic-nevi-1.jpg' class = 'block-center rotate180'>	Training5	8	1	Benign
Hard to Easy	2014	<img src ='img/train/superficial-spreading-40.jpg' class = 'block-center rotate0'>	Training5	9	1	Melanoma
Hard to Easy	2014	<img src ='img/train/acral-lentiginous-16.jpg' class = 'block-center rotate180'>	Training5	10	0	Melanoma
Hard to Easy	2014	<img src ='img/train/lentigo-magligna-14.jpg' class = 'block-center rotate270'>	Training5	11	1	Melanoma
Hard to Easy	2014	<img src ='img/train/nodular-1.jpg' class = 'block-center rotate90'>	Training5	12	1	Melanoma
Hard to Easy	2014	<img src ='img/train/blue-nevus-29.jpg' class = 'block-center rotate90'>	Training5	13	0	Benign
Hard to Easy	2014	<img src ='img/train/nodular-35.jpg' class = 'block-center rotate270'>	Training5	14	1	Melanoma
Hard to Easy	2014	<img src ='img/train/melancocytic-nevi-17.jpg' class = 'block-center rotate90'>	Training5	15	0	Benign
Hard to Easy	2014	<img src ='img/train/superficial-spreading-9.png' class = 'block-center rotate0'>	Training5	16	1	Melanoma
Hard to Easy	2014	<img src ='img/train/superficial-spreading-2.jpg' class = 'block-center rotate0'>	Training5	17	0	Melanoma
Hard to Easy	2014	<img src ='img/train/acral-lentiginous-24.jpg' class = 'block-center rotate0'>	Training5	18	1	Melanoma
Hard to Easy	2014	<img src ='img/train/lentigo-23.jpg' class = 'block-center rotate180'>	Training5	19	1	Benign
Hard to Easy	2014	<img src ='img/train/lentigo-magligna-6.jpg' class = 'block-center rotate270'>	Training5	20	0	Melanoma
Hard to Easy	2014	<img src ='img/train/superficial-spreading-8.jpg' class = 'block-center rotate0'>	Training5	21	1	Melanoma
Hard to Easy	2014	<img src ='img/train/lentigo-28.jpg' class = 'block-center rotate180'>	Training5	22	1	Benign
Hard to Easy	2014	<img src ='img/train/acral-lentiginous-28.jpg' class = 'block-center rotate0'>	Training5	23	1	Melanoma
Hard to Easy	2014	<img src ='img/train/melancocytic-nevi-37.jpg' class = 'block-center rotate270'>	Training5	24	0	Benign
Hard to Easy	2014	<img src ='img/train/blue-nevus-7.jpg' class = 'block-center rotate0'>	Training5	25	0	Benign
Hard to Easy	2014	<img src ='img/train/lentigo-6.jpg' class = 'block-center rotate90'>	Training5	26	0	Benign
Hard to Easy	2014	<img src ='img/train/superficial-spreading-7.jpg' class = 'block-center rotate90'>	Training5	27	1	Melanoma
Hard to Easy	2014	<img src ='img/train/acral-lentiginous-22.jpg' class = 'block-center rotate0'>	Training5	28	1	Melanoma
Hard to Easy	2014	<img src ='img/train/nodular-27.jpg' class = 'block-center rotate0'>	Training5	29	0	Melanoma
Hard to Easy	2014	<img src ='img/train/lentigo-27.jpg' class = 'block-center rotate0'>	Training5	30	1	Benign
Hard to Easy	2014	<img src ='img/train/lentigo-magligna-15.jpg' class = 'block-center rotate180'>	Training5	31	0	Melanoma
Hard to Easy	2014	<img src ='img/train/seborrheic-keratoses-13.jpg' class = 'block-center rotate0'>	Training5	32	0	Benign
Hard to Easy	2014	<img src ='img/train/superficial-spreading-8.jpg' class = 'block-center rotate270'>	Training6	1	0	Melanoma
Hard to Easy	2014	<img src ='img/train/acral-lentiginous-22.jpg' class = 'block-center rotate0'>	Training6	2	1	Melanoma
Hard to Easy	2014	<img src ='img/train/melancocytic-nevi-17.jpg' class = 'block-center rotate180'>	Training6	3	0	Benign
Hard to Easy	2014	<img src ='img/train/superficial-spreading-2.jpg' class = 'block-center rotate270'>	Training6	4	1	Melanoma
Hard to Easy	2014	<img src ='img/train/blue-nevus-21.jpg' class = 'block-center rotate0'>	Training6	5	0	Benign
Hard to Easy	2014	<img src ='img/train/lentigo-13.jpg' class = 'block-center rotate270'>	Training6	6	1	Benign
Hard to Easy	2014	<img src ='img/train/nodular-27.jpg' class = 'block-center rotate0'>	Training6	7	1	Melanoma
Hard to Easy	2014	<img src ='img/train/superficial-spreading-7.jpg' class = 'block-center rotate270'>	Training6	8	1	Melanoma
Hard to Easy	2014	<img src ='img/train/melancocytic-nevi-30.jpg' class = 'block-center rotate270'>	Training6	9	1	Benign
Hard to Easy	2014	<img src ='img/train/lentigo-6.jpg' class = 'block-center rotate0'>	Training6	10	1	Benign
Hard to Easy	2014	<img src ='img/train/superficial-spreading-40.jpg' class = 'block-center rotate180'>	Training6	11	1	Melanoma
Hard to Easy	2014	<img src ='img/train/blue-nevus-2.jpg' class = 'block-center rotate270'>	Training6	12	1	Benign
Hard to Easy	2014	<img src ='img/train/lentigo-magligna-15.jpg' class = 'block-center rotate270'>	Training6	13	1	Melanoma
Hard to Easy	2014	<img src ='img/train/blue-nevus-7.jpg' class = 'block-center rotate180'>	Training6	14	1	Benign
Hard to Easy	2014	<img src ='img/train/lentigo-28.jpg' class = 'block-center rotate0'>	Training6	15	1	Benign
Hard to Easy	2014	<img src ='img/train/acral-lentiginous-28.jpg' class = 'block-center rotate180'>	Training6	16	1	Melanoma
Hard to Easy	2014	<img src ='img/train/nodular-1.jpg' class = 'block-center rotate90'>	Training6	17	0	Melanoma
Hard to Easy	2014	<img src ='img/train/lentigo-23.jpg' class = 'block-center rotate90'>	Training6	18	1	Benign
Hard to Easy	2014	<img src ='img/train/acral-lentiginous-24.jpg' class = 'block-center rotate270'>	Training6	19	1	Melanoma
Hard to Easy	2014	<img src ='img/train/lentigo-magligna-6.jpg' class = 'block-center rotate90'>	Training6	20	0	Melanoma
Hard to Easy	2014	<img src ='img/train/melancocytic-nevi-37.jpg' class = 'block-center rotate180'>	Training6	21	1	Benign
Hard to Easy	2014	<img src ='img/train/blue-nevus-29.jpg' class = 'block-center rotate0'>	Training6	22	1	Benign
Hard to Easy	2014	<img src ='img/train/superficial-spreading-9.png' class = 'block-center rotate270'>	Training6	23	1	Melanoma
Hard to Easy	2014	<img src ='img/train/nodular-35.jpg' class = 'block-center rotate0'>	Training6	24	1	Melanoma
Hard to Easy	2014	<img src ='img/train/acral-lentiginous-16.jpg' class = 'block-center rotate90'>	Training6	25	0	Melanoma
Hard to Easy	2014	<img src ='img/train/melancocytic-nevi-1.jpg' class = 'block-center rotate270'>	Training6	26	1	Benign
Hard to Easy	2014	<img src ='img/train/seborrheic-keratoses-1.jpg' class = 'block-center rotate0'>	Training6	27	0	Benign
Hard to Easy	2014	<img src ='img/train/lentigo-33.jpg' class = 'block-center rotate180'>	Training6	28	0	Benign
Hard to Easy	2014	<img src ='img/train/lentigo-magligna-36.jpg' class = 'block-center rotate270'>	Training6	29	0	Melanoma
Hard to Easy	2014	<img src ='img/train/lentigo-magligna-14.jpg' class = 'block-center rotate0'>	Training6	30	1	Melanoma
Hard to Easy	2014	<img src ='img/train/lentigo-27.jpg' class = 'block-center rotate180'>	Training6	31	1	Benign
Hard to Easy	2014	<img src ='img/train/seborrheic-keratoses-13.jpg' class = 'block-center rotate0'>	Training6	32	1	Benign
Hard to Easy	2014	<img src ='img/train/seborrheic-keratoses-1.jpg' class = 'block-center rotate180'>	Training7	1	1	Benign
Hard to Easy	2014	<img src ='img/train/acral-lentiginous-28.jpg' class = 'block-center rotate90'>	Training7	2	1	Melanoma
Hard to Easy	2014	<img src ='img/train/nodular-35.jpg' class = 'block-center rotate90'>	Training7	3	1	Melanoma
Hard to Easy	2014	<img src ='img/train/superficial-spreading-9.png' class = 'block-center rotate90'>	Training7	4	0	Melanoma
Hard to Easy	2014	<img src ='img/train/lentigo-magligna-36.jpg' class = 'block-center rotate90'>	Training7	5	1	Melanoma
Hard to Easy	2014	<img src ='img/train/superficial-spreading-7.jpg' class = 'block-center rotate270'>	Training7	6	0	Melanoma
Hard to Easy	2014	<img src ='img/train/lentigo-28.jpg' class = 'block-center rotate270'>	Training7	7	1	Benign
Hard to Easy	2014	<img src ='img/train/superficial-spreading-2.jpg' class = 'block-center rotate0'>	Training7	8	0	Melanoma
Hard to Easy	2014	<img src ='img/train/acral-lentiginous-24.jpg' class = 'block-center rotate270'>	Training7	9	1	Melanoma
Hard to Easy	2014	<img src ='img/train/superficial-spreading-40.jpg' class = 'block-center rotate180'>	Training7	10	1	Melanoma
Hard to Easy	2014	<img src ='img/train/lentigo-13.jpg' class = 'block-center rotate180'>	Training7	11	1	Benign
Hard to Easy	2014	<img src ='img/train/blue-nevus-29.jpg' class = 'block-center rotate180'>	Training7	12	1	Benign
Hard to Easy	2014	<img src ='img/train/lentigo-6.jpg' class = 'block-center rotate270'>	Training7	13	1	Benign
Hard to Easy	2014	<img src ='img/train/nodular-1.jpg' class = 'block-center rotate180'>	Training7	14	1	Melanoma
Hard to Easy	2014	<img src ='img/train/seborrheic-keratoses-13.jpg' class = 'block-center rotate0'>	Training7	15	1	Benign
Hard to Easy	2014	<img src ='img/train/lentigo-33.jpg' class = 'block-center rotate270'>	Training7	16	0	Benign
Hard to Easy	2014	<img src ='img/train/lentigo-23.jpg' class = 'block-center rotate90'>	Training7	17	0	Benign
Hard to Easy	2014	<img src ='img/train/superficial-spreading-8.jpg' class = 'block-center rotate90'>	Training7	18	0	Melanoma
Hard to Easy	2014	<img src ='img/train/melancocytic-nevi-17.jpg' class = 'block-center rotate180'>	Training7	19	0	Benign
Hard to Easy	2014	<img src ='img/train/lentigo-27.jpg' class = 'block-center rotate0'>	Training7	20	1	Benign
Hard to Easy	2014	<img src ='img/train/blue-nevus-7.jpg' class = 'block-center rotate180'>	Training7	21	1	Benign
Hard to Easy	2014	<img src ='img/train/lentigo-magligna-14.jpg' class = 'block-center rotate180'>	Training7	22	1	Melanoma
Hard to Easy	2014	<img src ='img/train/lentigo-magligna-15.jpg' class = 'block-center rotate180'>	Training7	23	1	Melanoma
Hard to Easy	2014	<img src ='img/train/acral-lentiginous-22.jpg' class = 'block-center rotate90'>	Training7	24	1	Melanoma
Hard to Easy	2014	<img src ='img/train/acral-lentiginous-16.jpg' class = 'block-center rotate0'>	Training7	25	1	Melanoma
Hard to Easy	2014	<img src ='img/train/blue-nevus-2.jpg' class = 'block-center rotate180'>	Training7	26	1	Benign
Hard to Easy	2014	<img src ='img/train/blue-nevus-21.jpg' class = 'block-center rotate90'>	Training7	27	1	Benign
Hard to Easy	2014	<img src ='img/train/lentigo-magligna-6.jpg' class = 'block-center rotate180'>	Training7	28	1	Melanoma
Hard to Easy	2014	<img src ='img/train/melancocytic-nevi-30.jpg' class = 'block-center rotate0'>	Training7	29	1	Benign
Hard to Easy	2014	<img src ='img/train/melancocytic-nevi-1.jpg' class = 'block-center rotate90'>	Training7	30	1	Benign
Hard to Easy	2014	<img src ='img/train/melancocytic-nevi-37.jpg' class = 'block-center rotate270'>	Training7	31	1	Benign
Hard to Easy	2014	<img src ='img/train/nodular-27.jpg' class = 'block-center rotate90'>	Training7	32	1	Melanoma
Hard to Easy	2014	<img src ='img/train/seborrheic-keratoses-1.jpg' class = 'block-center rotate270'>	Training8	1	1	Benign
Hard to Easy	2014	<img src ='img/train/lentigo-27.jpg' class = 'block-center rotate180'>	Training8	2	1	Benign
Hard to Easy	2014	<img src ='img/train/lentigo-magligna-14.jpg' class = 'block-center rotate0'>	Training8	3	1	Melanoma
Hard to Easy	2014	<img src ='img/train/acral-lentiginous-24.jpg' class = 'block-center rotate180'>	Training8	4	1	Melanoma
Hard to Easy	2014	<img src ='img/train/acral-lentiginous-28.jpg' class = 'block-center rotate0'>	Training8	5	1	Melanoma
Hard to Easy	2014	<img src ='img/train/seborrheic-keratoses-13.jpg' class = 'block-center rotate90'>	Training8	6	1	Benign
Hard to Easy	2014	<img src ='img/train/nodular-1.jpg' class = 'block-center rotate0'>	Training8	7	1	Melanoma
Hard to Easy	2014	<img src ='img/train/lentigo-magligna-36.jpg' class = 'block-center rotate0'>	Training8	8	1	Melanoma
Hard to Easy	2014	<img src ='img/train/superficial-spreading-2.jpg' class = 'block-center rotate180'>	Training8	9	0	Melanoma
Hard to Easy	2014	<img src ='img/train/melancocytic-nevi-30.jpg' class = 'block-center rotate90'>	Training8	10	1	Benign
Hard to Easy	2014	<img src ='img/train/acral-lentiginous-22.jpg' class = 'block-center rotate0'>	Training8	11	1	Melanoma
Hard to Easy	2014	<img src ='img/train/superficial-spreading-8.jpg' class = 'block-center rotate270'>	Training8	12	0	Melanoma
Hard to Easy	2014	<img src ='img/train/melancocytic-nevi-1.jpg' class = 'block-center rotate0'>	Training8	13	0	Benign
Hard to Easy	2014	<img src ='img/train/lentigo-magligna-15.jpg' class = 'block-center rotate0'>	Training8	14	1	Melanoma
Hard to Easy	2014	<img src ='img/train/blue-nevus-21.jpg' class = 'block-center rotate0'>	Training8	15	1	Benign
Hard to Easy	2014	<img src ='img/train/superficial-spreading-9.png' class = 'block-center rotate90'>	Training8	16	1	Melanoma
Hard to Easy	2014	<img src ='img/train/lentigo-23.jpg' class = 'block-center rotate0'>	Training8	17	0	Benign
Hard to Easy	2014	<img src ='img/train/lentigo-28.jpg' class = 'block-center rotate180'>	Training8	18	1	Benign
Hard to Easy	2014	<img src ='img/train/blue-nevus-7.jpg' class = 'block-center rotate270'>	Training8	19	1	Benign
Hard to Easy	2014	<img src ='img/train/superficial-spreading-40.jpg' class = 'block-center rotate180'>	Training8	20	1	Melanoma
Hard to Easy	2014	<img src ='img/train/nodular-35.jpg' class = 'block-center rotate90'>	Training8	21	1	Melanoma
Hard to Easy	2014	<img src ='img/train/blue-nevus-29.jpg' class = 'block-center rotate90'>	Training8	22	1	Benign
Hard to Easy	2014	<img src ='img/train/acral-lentiginous-16.jpg' class = 'block-center rotate90'>	Training8	23	1	Melanoma
Hard to Easy	2014	<img src ='img/train/superficial-spreading-7.jpg' class = 'block-center rotate0'>	Training8	24	0	Melanoma
Hard to Easy	2014	<img src ='img/train/blue-nevus-2.jpg' class = 'block-center rotate90'>	Training8	25	1	Benign
Hard to Easy	2014	<img src ='img/train/nodular-27.jpg' class = 'block-center rotate90'>	Training8	26	1	Melanoma
Hard to Easy	2014	<img src ='img/train/lentigo-33.jpg' class = 'block-center rotate180'>	Training8	27	1	Benign
Hard to Easy	2014	<img src ='img/train/melancocytic-nevi-37.jpg' class = 'block-center rotate90'>	Training8	28	1	Benign
Hard to Easy	2014	<img src ='img/train/lentigo-13.jpg' class = 'block-center rotate270'>	Training8	29	0	Benign
Hard to Easy	2014	<img src ='img/train/lentigo-6.jpg' class = 'block-center rotate0'>	Training8	30	1	Benign
Hard to Easy	2014	<img src ='img/train/lentigo-magligna-6.jpg' class = 'block-center rotate90'>	Training8	31	1	Melanoma
Hard to Easy	2014	<img src ='img/train/melancocytic-nevi-17.jpg' class = 'block-center rotate270'>	Training8	32	0	Benign
Hard to Easy	2014	<img src ='img/train/superficial-spreading-26.jpg' class = 'block-center rotate0'>	Training9	1	1	Melanoma
Hard to Easy	2014	<img src ='img/train/lentigo-magligna-10.jpg' class = 'block-center rotate270'>	Training9	2	0	Melanoma
Hard to Easy	2014	<img src ='img/train/seborrheic-keratoses-18.jpg' class = 'block-center rotate180'>	Training9	3	1	Benign
Hard to Easy	2014	<img src ='img/train/seborrheic-keratoses-30.jpg' class = 'block-center rotate270'>	Training9	4	1	Benign
Hard to Easy	2014	<img src ='img/train/acral-lentiginous-5.jpg' class = 'block-center rotate0'>	Training9	5	1	Melanoma
Hard to Easy	2014	<img src ='img/train/lentigo-magligna-33.jpg' class = 'block-center rotate90'>	Training9	6	1	Melanoma
Hard to Easy	2014	<img src ='img/train/melancocytic-nevi-4.jpg' class = 'block-center rotate270'>	Training9	7	1	Benign
Hard to Easy	2014	<img src ='img/train/melancocytic-nevi-13.jpg' class = 'block-center rotate270'>	Training9	8	1	Benign
Hard to Easy	2014	<img src ='img/train/melancocytic-nevi-3.jpg' class = 'block-center rotate270'>	Training9	9	0	Benign
Hard to Easy	2014	<img src ='img/train/acral-lentiginous-14.jpg' class = 'block-center rotate90'>	Training9	10	1	Melanoma
Hard to Easy	2014	<img src ='img/train/superficial-spreading-1.jpg' class = 'block-center rotate180'>	Training9	11	1	Melanoma
Hard to Easy	2014	<img src ='img/train/acral-lentiginous-20.jpg' class = 'block-center rotate90'>	Training9	12	1	Melanoma
Hard to Easy	2014	<img src ='img/train/nodular-8.jpg' class = 'block-center rotate0'>	Training9	13	1	Melanoma
Hard to Easy	2014	<img src ='img/train/melancocytic-nevi-9.jpg' class = 'block-center rotate90'>	Training9	14	1	Benign
Hard to Easy	2014	<img src ='img/train/superficial-spreading-16.jpg' class = 'block-center rotate270'>	Training9	15	1	Melanoma
Hard to Easy	2014	<img src ='img/train/melancocytic-nevi-20.jpg' class = 'block-center rotate0'>	Training9	16	1	Benign
Hard to Easy	2014	<img src ='img/train/melancocytic-nevi-12.jpg' class = 'block-center rotate0'>	Training9	17	1	Benign
Hard to Easy	2014	<img src ='img/train/blue-nevus-30.jpg' class = 'block-center rotate180'>	Training9	18	1	Benign
Hard to Easy	2014	<img src ='img/train/lentigo-magligna-41.jpg' class = 'block-center rotate0'>	Training9	19	1	Melanoma
Hard to Easy	2014	<img src ='img/train/superficial-spreading-38.jpg' class = 'block-center rotate90'>	Training9	20	1	Melanoma
Hard to Easy	2014	<img src ='img/train/seborrheic-keratoses-5.jpg' class = 'block-center rotate180'>	Training9	21	1	Benign
Hard to Easy	2014	<img src ='img/train/blue-nevus-17.jpg' class = 'block-center rotate90'>	Training9	22	1	Benign
Hard to Easy	2014	<img src ='img/train/lentigo-magligna-1.jpg' class = 'block-center rotate0'>	Training9	23	1	Melanoma
Hard to Easy	2014	<img src ='img/train/seborrheic-keratoses-9.jpg' class = 'block-center rotate90'>	Training9	24	0	Benign
Hard to Easy	2014	<img src ='img/train/acral-lentiginous-4.jpg' class = 'block-center rotate90'>	Training9	25	1	Melanoma
Hard to Easy	2014	<img src ='img/train/superficial-spreading-19.jpg' class = 'block-center rotate0'>	Training9	26	1	Melanoma
Hard to Easy	2014	<img src ='img/train/blue-nevus-11.jpg' class = 'block-center rotate270'>	Training9	27	1	Benign
Hard to Easy	2014	<img src ='img/train/seborrheic-keratoses-33.jpg' class = 'block-center rotate90'>	Training9	28	1	Benign
Hard to Easy	2014	<img src ='img/train/seborrheic-keratoses-2.jpg' class = 'block-center rotate180'>	Training9	29	1	Benign
Hard to Easy	2014	<img src ='img/train/nodular-11.jpg' class = 'block-center rotate0'>	Training9	30	1	Melanoma
Hard to Easy	2014	<img src ='img/train/acral-lentiginous-37.jpg' class = 'block-center rotate90'>	Training9	31	1	Melanoma
Hard to Easy	2014	<img src ='img/train/seborrheic-keratoses-10.jpg' class = 'block-center rotate90'>	Training9	32	0	Benign
Hard to Easy	2014	<img src ='img/train/superficial-spreading-1.jpg' class = 'block-center rotate0'>	Training10	1	1	Melanoma
Hard to Easy	2014	<img src ='img/train/blue-nevus-17.jpg' class = 'block-center rotate180'>	Training10	2	1	Benign
Hard to Easy	2014	<img src ='img/train/seborrheic-keratoses-5.jpg' class = 'block-center rotate90'>	Training10	3	1	Benign
Hard to Easy	2014	<img src ='img/train/seborrheic-keratoses-2.jpg' class = 'block-center rotate270'>	Training10	4	1	Benign
Hard to Easy	2014	<img src ='img/train/superficial-spreading-16.jpg' class = 'block-center rotate90'>	Training10	5	1	Melanoma
Hard to Easy	2014	<img src ='img/train/superficial-spreading-38.jpg' class = 'block-center rotate90'>	Training10	6	1	Melanoma
Hard to Easy	2014	<img src ='img/train/lentigo-magligna-10.jpg' class = 'block-center rotate180'>	Training10	7	1	Melanoma
Hard to Easy	2014	<img src ='img/train/melancocytic-nevi-13.jpg' class = 'block-center rotate180'>	Training10	8	1	Benign
Hard to Easy	2014	<img src ='img/train/acral-lentiginous-5.jpg' class = 'block-center rotate90'>	Training10	9	1	Melanoma
Hard to Easy	2014	<img src ='img/train/seborrheic-keratoses-33.jpg' class = 'block-center rotate270'>	Training10	10	1	Benign
Hard to Easy	2014	<img src ='img/train/seborrheic-keratoses-18.jpg' class = 'block-center rotate0'>	Training10	11	1	Benign
Hard to Easy	2014	<img src ='img/train/superficial-spreading-26.jpg' class = 'block-center rotate90'>	Training10	12	1	Melanoma
Hard to Easy	2014	<img src ='img/train/nodular-11.jpg' class = 'block-center rotate0'>	Training10	13	1	Melanoma
Hard to Easy	2014	<img src ='img/train/melancocytic-nevi-12.jpg' class = 'block-center rotate0'>	Training10	14	1	Benign
Hard to Easy	2014	<img src ='img/train/melancocytic-nevi-4.jpg' class = 'block-center rotate270'>	Training10	15	1	Benign
Hard to Easy	2014	<img src ='img/train/lentigo-magligna-33.jpg' class = 'block-center rotate270'>	Training10	16	1	Melanoma
Hard to Easy	2014	<img src ='img/train/lentigo-magligna-41.jpg' class = 'block-center rotate180'>	Training10	17	1	Melanoma
Hard to Easy	2014	<img src ='img/train/acral-lentiginous-37.jpg' class = 'block-center rotate90'>	Training10	18	1	Melanoma
Hard to Easy	2014	<img src ='img/train/seborrheic-keratoses-9.jpg' class = 'block-center rotate270'>	Training10	19	1	Benign
Hard to Easy	2014	<img src ='img/train/nodular-8.jpg' class = 'block-center rotate0'>	Training10	20	1	Melanoma
Hard to Easy	2014	<img src ='img/train/blue-nevus-11.jpg' class = 'block-center rotate180'>	Training10	21	1	Benign
Hard to Easy	2014	<img src ='img/train/acral-lentiginous-14.jpg' class = 'block-center rotate0'>	Training10	22	1	Melanoma
Hard to Easy	2014	<img src ='img/train/melancocytic-nevi-9.jpg' class = 'block-center rotate90'>	Training10	23	1	Benign
Hard to Easy	2014	<img src ='img/train/melancocytic-nevi-3.jpg' class = 'block-center rotate270'>	Training10	24	0	Benign
Hard to Easy	2014	<img src ='img/train/acral-lentiginous-4.jpg' class = 'block-center rotate0'>	Training10	25	1	Melanoma
Hard to Easy	2014	<img src ='img/train/superficial-spreading-19.jpg' class = 'block-center rotate270'>	Training10	26	1	Melanoma
Hard to Easy	2014	<img src ='img/train/acral-lentiginous-20.jpg' class = 'block-center rotate180'>	Training10	27	1	Melanoma
Hard to Easy	2014	<img src ='img/train/seborrheic-keratoses-30.jpg' class = 'block-center rotate180'>	Training10	28	1	Benign
Hard to Easy	2014	<img src ='img/train/lentigo-magligna-1.jpg' class = 'block-center rotate90'>	Training10	29	1	Melanoma
Hard to Easy	2014	<img src ='img/train/seborrheic-keratoses-10.jpg' class = 'block-center rotate270'>	Training10	30	1	Benign
Hard to Easy	2014	<img src ='img/train/blue-nevus-30.jpg' class = 'block-center rotate180'>	Training10	31	1	Benign
Hard to Easy	2014	<img src ='img/train/melancocytic-nevi-20.jpg' class = 'block-center rotate90'>	Training10	32	1	Benign
Hard to Easy	2014	<img src ='img/train/nodular-8.jpg' class = 'block-center rotate90'>	Training11	1	1	Melanoma
Hard to Easy	2014	<img src ='img/train/blue-nevus-17.jpg' class = 'block-center rotate90'>	Training11	2	1	Benign
Hard to Easy	2014	<img src ='img/train/acral-lentiginous-5.jpg' class = 'block-center rotate0'>	Training11	3	1	Melanoma
Hard to Easy	2014	<img src ='img/train/superficial-spreading-19.jpg' class = 'block-center rotate180'>	Training11	4	1	Melanoma
Hard to Easy	2014	<img src ='img/train/acral-lentiginous-4.jpg' class = 'block-center rotate270'>	Training11	5	1	Melanoma
Hard to Easy	2014	<img src ='img/train/superficial-spreading-26.jpg' class = 'block-center rotate0'>	Training11	6	1	Melanoma
Hard to Easy	2014	<img src ='img/train/blue-nevus-30.jpg' class = 'block-center rotate180'>	Training11	7	1	Benign
Hard to Easy	2014	<img src ='img/train/superficial-spreading-38.jpg' class = 'block-center rotate0'>	Training11	8	1	Melanoma
Hard to Easy	2014	<img src ='img/train/acral-lentiginous-14.jpg' class = 'block-center rotate270'>	Training11	9	1	Melanoma
Hard to Easy	2014	<img src ='img/train/melancocytic-nevi-3.jpg' class = 'block-center rotate90'>	Training11	10	1	Benign
Hard to Easy	2014	<img src ='img/train/lentigo-magligna-1.jpg' class = 'block-center rotate180'>	Training11	11	1	Melanoma
Hard to Easy	2014	<img src ='img/train/acral-lentiginous-37.jpg' class = 'block-center rotate90'>	Training11	12	1	Melanoma
Hard to Easy	2014	<img src ='img/train/acral-lentiginous-20.jpg' class = 'block-center rotate180'>	Training11	13	1	Melanoma
Hard to Easy	2014	<img src ='img/train/melancocytic-nevi-12.jpg' class = 'block-center rotate270'>	Training11	14	1	Benign
Hard to Easy	2014	<img src ='img/train/seborrheic-keratoses-2.jpg' class = 'block-center rotate270'>	Training11	15	1	Benign
Hard to Easy	2014	<img src ='img/train/seborrheic-keratoses-33.jpg' class = 'block-center rotate0'>	Training11	16	1	Benign
Hard to Easy	2014	<img src ='img/train/melancocytic-nevi-9.jpg' class = 'block-center rotate270'>	Training11	17	1	Benign
Hard to Easy	2014	<img src ='img/train/superficial-spreading-16.jpg' class = 'block-center rotate0'>	Training11	18	1	Melanoma
Hard to Easy	2014	<img src ='img/train/lentigo-magligna-10.jpg' class = 'block-center rotate180'>	Training11	19	1	Melanoma
Hard to Easy	2014	<img src ='img/train/blue-nevus-11.jpg' class = 'block-center rotate0'>	Training11	20	1	Benign
Hard to Easy	2014	<img src ='img/train/lentigo-magligna-33.jpg' class = 'block-center rotate0'>	Training11	21	1	Melanoma
Hard to Easy	2014	<img src ='img/train/melancocytic-nevi-20.jpg' class = 'block-center rotate180'>	Training11	22	1	Benign
Hard to Easy	2014	<img src ='img/train/melancocytic-nevi-13.jpg' class = 'block-center rotate180'>	Training11	23	1	Benign
Hard to Easy	2014	<img src ='img/train/melancocytic-nevi-4.jpg' class = 'block-center rotate0'>	Training11	24	0	Benign
Hard to Easy	2014	<img src ='img/train/superficial-spreading-1.jpg' class = 'block-center rotate0'>	Training11	25	1	Melanoma
Hard to Easy	2014	<img src ='img/train/seborrheic-keratoses-18.jpg' class = 'block-center rotate270'>	Training11	26	1	Benign
Hard to Easy	2014	<img src ='img/train/seborrheic-keratoses-30.jpg' class = 'block-center rotate270'>	Training11	27	1	Benign
Hard to Easy	2014	<img src ='img/train/seborrheic-keratoses-5.jpg' class = 'block-center rotate270'>	Training11	28	1	Benign
Hard to Easy	2014	<img src ='img/train/seborrheic-keratoses-10.jpg' class = 'block-center rotate270'>	Training11	29	1	Benign
Hard to Easy	2014	<img src ='img/train/nodular-11.jpg' class = 'block-center rotate90'>	Training11	30	1	Melanoma
Hard to Easy	2014	<img src ='img/train/seborrheic-keratoses-9.jpg' class = 'block-center rotate90'>	Training11	31	0	Benign
Hard to Easy	2014	<img src ='img/train/lentigo-magligna-41.jpg' class = 'block-center rotate0'>	Training11	32	1	Melanoma
Hard to Easy	2014	<img src ='img/train/melancocytic-nevi-12.jpg' class = 'block-center rotate0'>	Training12	1	1	Benign
Hard to Easy	2014	<img src ='img/train/seborrheic-keratoses-30.jpg' class = 'block-center rotate270'>	Training12	2	1	Benign
Hard to Easy	2014	<img src ='img/train/lentigo-magligna-41.jpg' class = 'block-center rotate270'>	Training12	3	1	Melanoma
Hard to Easy	2014	<img src ='img/train/acral-lentiginous-4.jpg' class = 'block-center rotate180'>	Training12	4	1	Melanoma
Hard to Easy	2014	<img src ='img/train/seborrheic-keratoses-2.jpg' class = 'block-center rotate270'>	Training12	5	0	Benign
Hard to Easy	2014	<img src ='img/train/melancocytic-nevi-4.jpg' class = 'block-center rotate270'>	Training12	6	1	Benign
Hard to Easy	2014	<img src ='img/train/seborrheic-keratoses-10.jpg' class = 'block-center rotate0'>	Training12	7	1	Benign
Hard to Easy	2014	<img src ='img/train/melancocytic-nevi-3.jpg' class = 'block-center rotate270'>	Training12	8	1	Benign
Hard to Easy	2014	<img src ='img/train/superficial-spreading-26.jpg' class = 'block-center rotate0'>	Training12	9	1	Melanoma
Hard to Easy	2014	<img src ='img/train/acral-lentiginous-14.jpg' class = 'block-center rotate0'>	Training12	10	1	Melanoma
Hard to Easy	2014	<img src ='img/train/seborrheic-keratoses-33.jpg' class = 'block-center rotate180'>	Training12	11	1	Benign
Hard to Easy	2014	<img src ='img/train/blue-nevus-11.jpg' class = 'block-center rotate90'>	Training12	12	1	Benign
Hard to Easy	2014	<img src ='img/train/seborrheic-keratoses-5.jpg' class = 'block-center rotate270'>	Training12	13	1	Benign
Hard to Easy	2014	<img src ='img/train/seborrheic-keratoses-18.jpg' class = 'block-center rotate270'>	Training12	14	1	Benign
Hard to Easy	2014	<img src ='img/train/superficial-spreading-16.jpg' class = 'block-center rotate180'>	Training12	15	1	Melanoma
Hard to Easy	2014	<img src ='img/train/lentigo-magligna-1.jpg' class = 'block-center rotate90'>	Training12	16	1	Melanoma
Hard to Easy	2014	<img src ='img/train/superficial-spreading-38.jpg' class = 'block-center rotate270'>	Training12	17	1	Melanoma
Hard to Easy	2014	<img src ='img/train/acral-lentiginous-5.jpg' class = 'block-center rotate270'>	Training12	18	1	Melanoma
Hard to Easy	2014	<img src ='img/train/lentigo-magligna-10.jpg' class = 'block-center rotate180'>	Training12	19	1	Melanoma
Hard to Easy	2014	<img src ='img/train/superficial-spreading-1.jpg' class = 'block-center rotate0'>	Training12	20	1	Melanoma
Hard to Easy	2014	<img src ='img/train/melancocytic-nevi-9.jpg' class = 'block-center rotate0'>	Training12	21	1	Benign
Hard to Easy	2014	<img src ='img/train/acral-lentiginous-20.jpg' class = 'block-center rotate0'>	Training12	22	1	Melanoma
Hard to Easy	2014	<img src ='img/train/lentigo-magligna-33.jpg' class = 'block-center rotate270'>	Training12	23	1	Melanoma
Hard to Easy	2014	<img src ='img/train/acral-lentiginous-37.jpg' class = 'block-center rotate270'>	Training12	24	1	Melanoma
Hard to Easy	2014	<img src ='img/train/nodular-11.jpg' class = 'block-center rotate0'>	Training12	25	1	Melanoma
Hard to Easy	2014	<img src ='img/train/melancocytic-nevi-13.jpg' class = 'block-center rotate90'>	Training12	26	1	Benign
Hard to Easy	2014	<img src ='img/train/blue-nevus-30.jpg' class = 'block-center rotate90'>	Training12	27	1	Benign
Hard to Easy	2014	<img src ='img/train/nodular-8.jpg' class = 'block-center rotate180'>	Training12	28	1	Melanoma
Hard to Easy	2014	<img src ='img/train/superficial-spreading-19.jpg' class = 'block-center rotate180'>	Training12	29	1	Melanoma
Hard to Easy	2014	<img src ='img/train/seborrheic-keratoses-9.jpg' class = 'block-center rotate0'>	Training12	30	1	Benign
Hard to Easy	2014	<img src ='img/train/blue-nevus-17.jpg' class = 'block-center rotate90'>	Training12	31	1	Benign
Hard to Easy	2014	<img src ='img/train/melancocytic-nevi-20.jpg' class = 'block-center rotate180'>	Training12	32	1	Benign
Hard to Easy	2014	img/test/blue-nevus-34.jpg	posttest	1	0	Benign
Hard to Easy	2014	img/test/lentigo-magligna-11.jpg	posttest	2	1	Melanoma
Hard to Easy	2014	img/test/melancocytic-nevi-14.jpg	posttest	3	1	Benign
Hard to Easy	2014	img/test/superficial-spreading-28.jpg	posttest	4	1	Melanoma
Hard to Easy	2014	img/test/lentigo-26.jpg	posttest	5	1	Benign
Hard to Easy	2014	img/test/seborrheic-keratoses-17.jpg	posttest	6	1	Benign
Hard to Easy	2014	img/test/blue-nevus-4.jpg	posttest	7	1	Benign
Hard to Easy	2014	img/test/blue-nevus-15.jpg	posttest	8	1	Benign
Hard to Easy	2014	img/test/melancocytic-nevi-16.jpg	posttest	9	1	Benign
Hard to Easy	2014	img/test/acral-lentiginous-11.jpg	posttest	10	1	Melanoma
Hard to Easy	2014	img/test/acral-lentiginous-40.jpg	posttest	11	1	Melanoma
Hard to Easy	2014	img/test/lentigo-magligna-19.jpg	posttest	12	1	Melanoma
Hard to Easy	2014	img/test/seborrheic-keratoses-27.jpg	posttest	13	1	Benign
Hard to Easy	2014	img/test/superficial-spreading-22.jpg	posttest	14	1	Melanoma
Hard to Easy	2014	img/test/melancocytic-nevi-39.jpg	posttest	15	0	Benign
Hard to Easy	2014	img/test/lentigo-magligna-22.jpg	posttest	16	1	Melanoma
Hard to Easy	2014	img/test/acral-lentiginous-6.jpg	posttest	17	1	Melanoma
Hard to Easy	2014	img/test/lentigo-20.jpg	posttest	18	1	Benign
Hard to Easy	2014	img/test/seborrheic-keratoses-7.jpg	posttest	19	1	Benign
Hard to Easy	2014	img/test/nodular-3.jpg	posttest	20	1	Melanoma
Hard to Easy	2014	img/test/melancocytic-nevi-2.jpg	posttest	21	1	Benign
Hard to Easy	2014	img/test/acral-lentiginous-15.jpg	posttest	22	1	Melanoma
Hard to Easy	2014	img/test/melancocytic-nevi-6.jpg	posttest	23	0	Benign
Hard to Easy	2014	img/test/superficial-spreading-13.jpg	posttest	24	1	Melanoma
Hard to Easy	2014	img/test/superficial-spreading-31.jpg	posttest	25	1	Melanoma
Hard to Easy	2014	img/test/nodular-25.jpg	posttest	26	1	Melanoma
Hard to Easy	2014	img/test/seborrheic-keratoses-25.jpg	posttest	27	1	Benign
Hard to Easy	2014	img/test/acral-lentiginous-34.jpg	posttest	28	1	Melanoma
Hard to Easy	2014	img/test/nodular-34.jpg	posttest	29	1	Melanoma
Hard to Easy	2014	img/test/seborrheic-keratoses-6.jpg	posttest	30	0	Benign
Hard to Easy	2014	img/test/superficial-spreading-15.jpg	posttest	31	1	Melanoma
Hard to Easy	2014	img/test/nodular-24.jpg	posttest	32	0	Melanoma
Hard to Easy	2014	img/test/blue-nevus-1.jpg	posttest	33	1	Benign
Hard to Easy	2014	img/test/melancocytic-nevi-21.jpg	posttest	34	0	Benign
Hard to Easy	2014	img/test/lentigo-36.jpg	posttest	35	0	Benign
Hard to Easy	2014	img/test/blue-nevus-27.jpg	posttest	36	1	Benign
Hard to Easy	2014	img/test/seborrheic-keratoses-31.jpg	posttest	37	1	Benign
Hard to Easy	2014	img/test/nodular-4.jpg	posttest	38	1	Melanoma
Hard to Easy	2014	img/test/acral-lentiginous-2.gif	posttest	39	1	Melanoma
Hard to Easy	2014	img/test/superficial-spreading-39.jpg	posttest	40	1	Melanoma
Hard to Easy	2014	img/test/lentigo-17.jpg	posttest	41	0	Benign
Hard to Easy	2014	img/test/lentigo-3.jpg	posttest	42	0	Benign
Hard to Easy	2014	img/test/lentigo-magligna-18.jpg	posttest	43	0	Melanoma
Hard to Easy	2014	img/test/lentigo-8.jpg	posttest	44	0	Benign
Hard to Easy	2014	img/test/nodular-17.jpg	posttest	45	1	Melanoma
Hard to Easy	2014	img/test/lentigo-magligna-5.jpg	posttest	46	1	Melanoma
Hard to Easy	2014	img/test/lentigo-magligna-24.jpg	posttest	47	1	Melanoma
Hard to Easy	2014	img/test/blue-nevus-12.jpg	posttest	48	0	Benign
Hard to Easy	2011	img/test/lentigo-magligna-5.jpg	pretest	1	1	Melanoma
Hard to Easy	2011	img/test/superficial-spreading-15.jpg	pretest	2	1	Melanoma
Hard to Easy	2011	img/test/seborrheic-keratoses-6.jpg	pretest	3	0	Benign
Hard to Easy	2011	img/test/lentigo-3.jpg	pretest	4	1	Benign
Hard to Easy	2011	img/test/seborrheic-keratoses-31.jpg	pretest	5	0	Benign
Hard to Easy	2011	img/test/blue-nevus-15.jpg	pretest	6	0	Benign
Hard to Easy	2011	img/test/blue-nevus-1.jpg	pretest	7	1	Benign
Hard to Easy	2011	img/test/acral-lentiginous-15.jpg	pretest	8	1	Melanoma
Hard to Easy	2011	img/test/lentigo-8.jpg	pretest	9	1	Benign
Hard to Easy	2011	img/test/nodular-17.jpg	pretest	10	1	Melanoma
Hard to Easy	2011	img/test/blue-nevus-4.jpg	pretest	11	1	Benign
Hard to Easy	2011	img/test/melancocytic-nevi-14.jpg	pretest	12	1	Benign
Hard to Easy	2011	img/test/melancocytic-nevi-2.jpg	pretest	13	1	Benign
Hard to Easy	2011	img/test/lentigo-magligna-22.jpg	pretest	14	1	Melanoma
Hard to Easy	2011	img/test/lentigo-36.jpg	pretest	15	0	Benign
Hard to Easy	2011	img/test/lentigo-20.jpg	pretest	16	1	Benign
Hard to Easy	2011	img/test/nodular-25.jpg	pretest	17	1	Melanoma
Hard to Easy	2011	img/test/lentigo-26.jpg	pretest	18	1	Benign
Hard to Easy	2011	img/test/nodular-34.jpg	pretest	19	1	Melanoma
Hard to Easy	2011	img/test/seborrheic-keratoses-27.jpg	pretest	20	0	Benign
Hard to Easy	2011	img/test/melancocytic-nevi-6.jpg	pretest	21	1	Benign
Hard to Easy	2011	img/test/acral-lentiginous-34.jpg	pretest	22	0	Melanoma
Hard to Easy	2011	img/test/melancocytic-nevi-21.jpg	pretest	23	1	Benign
Hard to Easy	2011	img/test/melancocytic-nevi-16.jpg	pretest	24	1	Benign
Hard to Easy	2011	img/test/superficial-spreading-13.jpg	pretest	25	1	Melanoma
Hard to Easy	2011	img/test/nodular-3.jpg	pretest	26	1	Melanoma
Hard to Easy	2011	img/test/blue-nevus-34.jpg	pretest	27	1	Benign
Hard to Easy	2011	img/test/acral-lentiginous-6.jpg	pretest	28	0	Melanoma
Hard to Easy	2011	img/test/blue-nevus-12.jpg	pretest	29	0	Benign
Hard to Easy	2011	img/test/acral-lentiginous-40.jpg	pretest	30	0	Melanoma
Hard to Easy	2011	img/test/lentigo-magligna-18.jpg	pretest	31	0	Melanoma
Hard to Easy	2011	img/test/lentigo-magligna-11.jpg	pretest	32	0	Melanoma
Hard to Easy	2011	img/test/acral-lentiginous-11.jpg	pretest	33	0	Melanoma
Hard to Easy	2011	img/test/lentigo-magligna-24.jpg	pretest	34	0	Melanoma
Hard to Easy	2011	img/test/lentigo-17.jpg	pretest	35	0	Benign
Hard to Easy	2011	img/test/nodular-24.jpg	pretest	36	1	Melanoma
Hard to Easy	2011	img/test/seborrheic-keratoses-7.jpg	pretest	37	1	Benign
Hard to Easy	2011	img/test/seborrheic-keratoses-25.jpg	pretest	38	0	Benign
Hard to Easy	2011	img/test/superficial-spreading-22.jpg	pretest	39	0	Melanoma
Hard to Easy	2011	img/test/superficial-spreading-31.jpg	pretest	40	1	Melanoma
Hard to Easy	2011	img/test/acral-lentiginous-2.gif	pretest	41	1	Melanoma
Hard to Easy	2011	img/test/superficial-spreading-28.jpg	pretest	42	1	Melanoma
Hard to Easy	2011	img/test/melancocytic-nevi-39.jpg	pretest	43	1	Benign
Hard to Easy	2011	img/test/blue-nevus-27.jpg	pretest	44	1	Benign
Hard to Easy	2011	img/test/lentigo-magligna-19.jpg	pretest	45	0	Melanoma
Hard to Easy	2011	img/test/superficial-spreading-39.jpg	pretest	46	1	Melanoma
Hard to Easy	2011	img/test/nodular-4.jpg	pretest	47	0	Melanoma
Hard to Easy	2011	img/test/seborrheic-keratoses-17.jpg	pretest	48	1	Benign
Hard to Easy	2011	<img src ='img/train/nodular-23.jpg' class = 'block-center rotate180'>	Training1	1	0	Melanoma
Hard to Easy	2011	<img src ='img/train/seborrheic-keratoses-37.jpg' class = 'block-center rotate0'>	Training1	2	1	Benign
Hard to Easy	2011	<img src ='img/train/seborrheic-keratoses-32.png' class = 'block-center rotate270'>	Training1	3	0	Benign
Hard to Easy	2011	<img src ='img/train/lentigo-34.jpg' class = 'block-center rotate270'>	Training1	4	1	Benign
Hard to Easy	2011	<img src ='img/train/acral-lentiginous-8.jpg' class = 'block-center rotate0'>	Training1	5	0	Melanoma
Hard to Easy	2011	<img src ='img/train/acral-lentiginous-29.jpg' class = 'block-center rotate90'>	Training1	6	1	Melanoma
Hard to Easy	2011	<img src ='img/train/nodular-21.jpg' class = 'block-center rotate270'>	Training1	7	1	Melanoma
Hard to Easy	2011	<img src ='img/train/lentigo-magligna-7.jpg' class = 'block-center rotate90'>	Training1	8	0	Melanoma
Hard to Easy	2011	<img src ='img/train/blue-nevus-33.jpg' class = 'block-center rotate90'>	Training1	9	0	Benign
Hard to Easy	2011	<img src ='img/train/blue-nevus-8.jpg' class = 'block-center rotate180'>	Training1	10	1	Benign
Hard to Easy	2011	<img src ='img/train/lentigo-4.jpg' class = 'block-center rotate270'>	Training1	11	0	Benign
Hard to Easy	2011	<img src ='img/train/acral-lentiginous-3.jpg' class = 'block-center rotate90'>	Training1	12	1	Melanoma
Hard to Easy	2011	<img src ='img/train/lentigo-31.jpg' class = 'block-center rotate90'>	Training1	13	1	Benign
Hard to Easy	2011	<img src ='img/train/nodular-40.jpg' class = 'block-center rotate270'>	Training1	14	0	Melanoma
Hard to Easy	2011	<img src ='img/train/lentigo-12.jpg' class = 'block-center rotate180'>	Training1	15	0	Benign
Hard to Easy	2011	<img src ='img/train/nodular-5.jpg' class = 'block-center rotate180'>	Training1	16	0	Melanoma
Hard to Easy	2011	<img src ='img/train/superficial-spreading-23.jpg' class = 'block-center rotate90'>	Training1	17	0	Melanoma
Hard to Easy	2011	<img src ='img/train/melancocytic-nevi-5.jpg' class = 'block-center rotate270'>	Training1	18	0	Benign
Hard to Easy	2011	<img src ='img/train/blue-nevus-36.jpg' class = 'block-center rotate0'>	Training1	19	1	Benign
Hard to Easy	2011	<img src ='img/train/lentigo-14.jpg' class = 'block-center rotate0'>	Training1	20	0	Benign
Hard to Easy	2011	<img src ='img/train/seborrheic-keratoses-28.jpg' class = 'block-center rotate0'>	Training1	21	0	Benign
Hard to Easy	2011	<img src ='img/train/lentigo-magligna-40.jpg' class = 'block-center rotate0'>	Training1	22	0	Melanoma
Hard to Easy	2011	<img src ='img/train/lentigo-32.jpg' class = 'block-center rotate270'>	Training1	23	0	Benign
Hard to Easy	2011	<img src ='img/train/nodular-41.jpg' class = 'block-center rotate270'>	Training1	24	0	Melanoma
Hard to Easy	2011	<img src ='img/train/superficial-spreading-14.jpg' class = 'block-center rotate270'>	Training1	25	1	Melanoma
Hard to Easy	2011	<img src ='img/train/melancocytic-nevi-38.jpg' class = 'block-center rotate180'>	Training1	26	0	Benign
Hard to Easy	2011	<img src ='img/train/lentigo-magligna-37.jpg' class = 'block-center rotate0'>	Training1	27	1	Melanoma
Hard to Easy	2011	<img src ='img/train/nodular-37.jpg' class = 'block-center rotate180'>	Training1	28	0	Melanoma
Hard to Easy	2011	<img src ='img/train/blue-nevus-32.jpg' class = 'block-center rotate0'>	Training1	29	1	Benign
Hard to Easy	2011	<img src ='img/train/blue-nevus-18.jpg' class = 'block-center rotate0'>	Training1	30	0	Benign
Hard to Easy	2011	<img src ='img/train/nodular-16.jpg' class = 'block-center rotate90'>	Training1	31	1	Melanoma
Hard to Easy	2011	<img src ='img/train/lentigo-magligna-32.jpg' class = 'block-center rotate0'>	Training1	32	1	Melanoma
Hard to Easy	2011	<img src ='img/train/lentigo-32.jpg' class = 'block-center rotate270'>	Training2	1	0	Benign
Hard to Easy	2011	<img src ='img/train/lentigo-31.jpg' class = 'block-center rotate270'>	Training2	2	0	Benign
Hard to Easy	2011	<img src ='img/train/acral-lentiginous-8.jpg' class = 'block-center rotate180'>	Training2	3	1	Melanoma
Hard to Easy	2011	<img src ='img/train/blue-nevus-36.jpg' class = 'block-center rotate90'>	Training2	4	1	Benign
Hard to Easy	2011	<img src ='img/train/acral-lentiginous-29.jpg' class = 'block-center rotate270'>	Training2	5	0	Melanoma
Hard to Easy	2011	<img src ='img/train/lentigo-magligna-40.jpg' class = 'block-center rotate0'>	Training2	6	1	Melanoma
Hard to Easy	2011	<img src ='img/train/nodular-23.jpg' class = 'block-center rotate90'>	Training2	7	0	Melanoma
Hard to Easy	2011	<img src ='img/train/lentigo-14.jpg' class = 'block-center rotate180'>	Training2	8	1	Benign
Hard to Easy	2011	<img src ='img/train/blue-nevus-18.jpg' class = 'block-center rotate0'>	Training2	9	1	Benign
Hard to Easy	2011	<img src ='img/train/lentigo-magligna-32.jpg' class = 'block-center rotate0'>	Training2	10	0	Melanoma
Hard to Easy	2011	<img src ='img/train/nodular-41.jpg' class = 'block-center rotate0'>	Training2	11	1	Melanoma
Hard to Easy	2011	<img src ='img/train/nodular-37.jpg' class = 'block-center rotate180'>	Training2	12	1	Melanoma
Hard to Easy	2011	<img src ='img/train/nodular-40.jpg' class = 'block-center rotate180'>	Training2	13	1	Melanoma
Hard to Easy	2011	<img src ='img/train/lentigo-magligna-37.jpg' class = 'block-center rotate90'>	Training2	14	0	Melanoma
Hard to Easy	2011	<img src ='img/train/lentigo-magligna-7.jpg' class = 'block-center rotate90'>	Training2	15	0	Melanoma
Hard to Easy	2011	<img src ='img/train/seborrheic-keratoses-32.png' class = 'block-center rotate180'>	Training2	16	1	Benign
Hard to Easy	2011	<img src ='img/train/melancocytic-nevi-38.jpg' class = 'block-center rotate0'>	Training2	17	1	Benign
Hard to Easy	2011	<img src ='img/train/melancocytic-nevi-5.jpg' class = 'block-center rotate90'>	Training2	18	0	Benign
Hard to Easy	2011	<img src ='img/train/lentigo-34.jpg' class = 'block-center rotate0'>	Training2	19	1	Benign
Hard to Easy	2011	<img src ='img/train/nodular-5.jpg' class = 'block-center rotate0'>	Training2	20	0	Melanoma
Hard to Easy	2011	<img src ='img/train/nodular-21.jpg' class = 'block-center rotate270'>	Training2	21	1	Melanoma
Hard to Easy	2011	<img src ='img/train/blue-nevus-32.jpg' class = 'block-center rotate90'>	Training2	22	0	Benign
Hard to Easy	2011	<img src ='img/train/lentigo-12.jpg' class = 'block-center rotate180'>	Training2	23	1	Benign
Hard to Easy	2011	<img src ='img/train/superficial-spreading-23.jpg' class = 'block-center rotate0'>	Training2	24	1	Melanoma
Hard to Easy	2011	<img src ='img/train/acral-lentiginous-3.jpg' class = 'block-center rotate0'>	Training2	25	1	Melanoma
Hard to Easy	2011	<img src ='img/train/blue-nevus-33.jpg' class = 'block-center rotate90'>	Training2	26	0	Benign
Hard to Easy	2011	<img src ='img/train/nodular-16.jpg' class = 'block-center rotate0'>	Training2	27	1	Melanoma
Hard to Easy	2011	<img src ='img/train/seborrheic-keratoses-37.jpg' class = 'block-center rotate270'>	Training2	28	1	Benign
Hard to Easy	2011	<img src ='img/train/seborrheic-keratoses-28.jpg' class = 'block-center rotate90'>	Training2	29	0	Benign
Hard to Easy	2011	<img src ='img/train/superficial-spreading-14.jpg' class = 'block-center rotate90'>	Training2	30	1	Melanoma
Hard to Easy	2011	<img src ='img/train/lentigo-4.jpg' class = 'block-center rotate90'>	Training2	31	1	Benign
Hard to Easy	2011	<img src ='img/train/blue-nevus-8.jpg' class = 'block-center rotate180'>	Training2	32	1	Benign
Hard to Easy	2011	<img src ='img/train/melancocytic-nevi-5.jpg' class = 'block-center rotate180'>	Training3	1	0	Benign
Hard to Easy	2011	<img src ='img/train/blue-nevus-33.jpg' class = 'block-center rotate270'>	Training3	2	1	Benign
Hard to Easy	2011	<img src ='img/train/seborrheic-keratoses-37.jpg' class = 'block-center rotate180'>	Training3	3	1	Benign
Hard to Easy	2011	<img src ='img/train/superficial-spreading-14.jpg' class = 'block-center rotate90'>	Training3	4	1	Melanoma
Hard to Easy	2011	<img src ='img/train/nodular-21.jpg' class = 'block-center rotate180'>	Training3	5	1	Melanoma
Hard to Easy	2011	<img src ='img/train/seborrheic-keratoses-32.png' class = 'block-center rotate270'>	Training3	6	1	Benign
Hard to Easy	2011	<img src ='img/train/lentigo-31.jpg' class = 'block-center rotate0'>	Training3	7	0	Benign
Hard to Easy	2011	<img src ='img/train/lentigo-34.jpg' class = 'block-center rotate180'>	Training3	8	1	Benign
Hard to Easy	2011	<img src ='img/train/nodular-5.jpg' class = 'block-center rotate90'>	Training3	9	1	Melanoma
Hard to Easy	2011	<img src ='img/train/lentigo-magligna-37.jpg' class = 'block-center rotate180'>	Training3	10	0	Melanoma
Hard to Easy	2011	<img src ='img/train/melancocytic-nevi-38.jpg' class = 'block-center rotate0'>	Training3	11	1	Benign
Hard to Easy	2011	<img src ='img/train/blue-nevus-18.jpg' class = 'block-center rotate90'>	Training3	12	0	Benign
Hard to Easy	2011	<img src ='img/train/lentigo-magligna-32.jpg' class = 'block-center rotate180'>	Training3	13	0	Melanoma
Hard to Easy	2011	<img src ='img/train/lentigo-14.jpg' class = 'block-center rotate180'>	Training3	14	0	Benign
Hard to Easy	2011	<img src ='img/train/acral-lentiginous-3.jpg' class = 'block-center rotate0'>	Training3	15	0	Melanoma
Hard to Easy	2011	<img src ='img/train/nodular-37.jpg' class = 'block-center rotate90'>	Training3	16	1	Melanoma
Hard to Easy	2011	<img src ='img/train/lentigo-32.jpg' class = 'block-center rotate90'>	Training3	17	0	Benign
Hard to Easy	2011	<img src ='img/train/acral-lentiginous-8.jpg' class = 'block-center rotate270'>	Training3	18	1	Melanoma
Hard to Easy	2011	<img src ='img/train/acral-lentiginous-29.jpg' class = 'block-center rotate90'>	Training3	19	0	Melanoma
Hard to Easy	2011	<img src ='img/train/nodular-16.jpg' class = 'block-center rotate270'>	Training3	20	1	Melanoma
Hard to Easy	2011	<img src ='img/train/nodular-41.jpg' class = 'block-center rotate270'>	Training3	21	1	Melanoma
Hard to Easy	2011	<img src ='img/train/seborrheic-keratoses-28.jpg' class = 'block-center rotate90'>	Training3	22	1	Benign
Hard to Easy	2011	<img src ='img/train/blue-nevus-36.jpg' class = 'block-center rotate270'>	Training3	23	0	Benign
Hard to Easy	2011	<img src ='img/train/blue-nevus-8.jpg' class = 'block-center rotate90'>	Training3	24	1	Benign
Hard to Easy	2011	<img src ='img/train/lentigo-magligna-40.jpg' class = 'block-center rotate180'>	Training3	25	1	Melanoma
Hard to Easy	2011	<img src ='img/train/nodular-40.jpg' class = 'block-center rotate180'>	Training3	26	0	Melanoma
Hard to Easy	2011	<img src ='img/train/lentigo-4.jpg' class = 'block-center rotate0'>	Training3	27	1	Benign
Hard to Easy	2011	<img src ='img/train/lentigo-magligna-7.jpg' class = 'block-center rotate90'>	Training3	28	0	Melanoma
Hard to Easy	2011	<img src ='img/train/lentigo-12.jpg' class = 'block-center rotate90'>	Training3	29	1	Benign
Hard to Easy	2011	<img src ='img/train/blue-nevus-32.jpg' class = 'block-center rotate90'>	Training3	30	1	Benign
Hard to Easy	2011	<img src ='img/train/superficial-spreading-23.jpg' class = 'block-center rotate180'>	Training3	31	1	Melanoma
Hard to Easy	2011	<img src ='img/train/nodular-23.jpg' class = 'block-center rotate90'>	Training3	32	1	Melanoma
Hard to Easy	2011	<img src ='img/train/nodular-5.jpg' class = 'block-center rotate0'>	Training4	1	1	Melanoma
Hard to Easy	2011	<img src ='img/train/nodular-41.jpg' class = 'block-center rotate180'>	Training4	2	1	Melanoma
Hard to Easy	2011	<img src ='img/train/melancocytic-nevi-38.jpg' class = 'block-center rotate90'>	Training4	3	1	Benign
Hard to Easy	2011	<img src ='img/train/lentigo-34.jpg' class = 'block-center rotate90'>	Training4	4	1	Benign
Hard to Easy	2011	<img src ='img/train/superficial-spreading-14.jpg' class = 'block-center rotate270'>	Training4	5	1	Melanoma
Hard to Easy	2011	<img src ='img/train/lentigo-31.jpg' class = 'block-center rotate0'>	Training4	6	1	Benign
Hard to Easy	2011	<img src ='img/train/acral-lentiginous-29.jpg' class = 'block-center rotate270'>	Training4	7	1	Melanoma
Hard to Easy	2011	<img src ='img/train/lentigo-magligna-40.jpg' class = 'block-center rotate0'>	Training4	8	1	Melanoma
Hard to Easy	2011	<img src ='img/train/lentigo-magligna-37.jpg' class = 'block-center rotate90'>	Training4	9	0	Melanoma
Hard to Easy	2011	<img src ='img/train/acral-lentiginous-3.jpg' class = 'block-center rotate90'>	Training4	10	0	Melanoma
Hard to Easy	2011	<img src ='img/train/lentigo-4.jpg' class = 'block-center rotate180'>	Training4	11	1	Benign
Hard to Easy	2011	<img src ='img/train/seborrheic-keratoses-28.jpg' class = 'block-center rotate90'>	Training4	12	1	Benign
Hard to Easy	2011	<img src ='img/train/nodular-23.jpg' class = 'block-center rotate180'>	Training4	13	0	Melanoma
Hard to Easy	2011	<img src ='img/train/nodular-16.jpg' class = 'block-center rotate180'>	Training4	14	1	Melanoma
Hard to Easy	2011	<img src ='img/train/lentigo-magligna-7.jpg' class = 'block-center rotate180'>	Training4	15	1	Melanoma
Hard to Easy	2011	<img src ='img/train/blue-nevus-33.jpg' class = 'block-center rotate270'>	Training4	16	1	Benign
Hard to Easy	2011	<img src ='img/train/seborrheic-keratoses-32.png' class = 'block-center rotate180'>	Training4	17	0	Benign
Hard to Easy	2011	<img src ='img/train/acral-lentiginous-8.jpg' class = 'block-center rotate270'>	Training4	18	1	Melanoma
Hard to Easy	2011	<img src ='img/train/lentigo-magligna-32.jpg' class = 'block-center rotate90'>	Training4	19	1	Melanoma
Hard to Easy	2011	<img src ='img/train/nodular-37.jpg' class = 'block-center rotate270'>	Training4	20	1	Melanoma
Hard to Easy	2011	<img src ='img/train/seborrheic-keratoses-37.jpg' class = 'block-center rotate180'>	Training4	21	0	Benign
Hard to Easy	2011	<img src ='img/train/blue-nevus-32.jpg' class = 'block-center rotate270'>	Training4	22	0	Benign
Hard to Easy	2011	<img src ='img/train/blue-nevus-8.jpg' class = 'block-center rotate180'>	Training4	23	0	Benign
Hard to Easy	2011	<img src ='img/train/lentigo-32.jpg' class = 'block-center rotate90'>	Training4	24	0	Benign
Hard to Easy	2011	<img src ='img/train/superficial-spreading-23.jpg' class = 'block-center rotate90'>	Training4	25	1	Melanoma
Hard to Easy	2011	<img src ='img/train/nodular-40.jpg' class = 'block-center rotate180'>	Training4	26	1	Melanoma
Hard to Easy	2011	<img src ='img/train/lentigo-14.jpg' class = 'block-center rotate270'>	Training4	27	0	Benign
Hard to Easy	2011	<img src ='img/train/blue-nevus-18.jpg' class = 'block-center rotate180'>	Training4	28	0	Benign
Hard to Easy	2011	<img src ='img/train/blue-nevus-36.jpg' class = 'block-center rotate90'>	Training4	29	0	Benign
Hard to Easy	2011	<img src ='img/train/nodular-21.jpg' class = 'block-center rotate270'>	Training4	30	1	Melanoma
Hard to Easy	2011	<img src ='img/train/melancocytic-nevi-5.jpg' class = 'block-center rotate90'>	Training4	31	0	Benign
Hard to Easy	2011	<img src ='img/train/lentigo-12.jpg' class = 'block-center rotate270'>	Training4	32	1	Benign
Hard to Easy	2011	<img src ='img/train/blue-nevus-2.jpg' class = 'block-center rotate270'>	Training5	1	1	Benign
Hard to Easy	2011	<img src ='img/train/lentigo-magligna-36.jpg' class = 'block-center rotate0'>	Training5	2	1	Melanoma
Hard to Easy	2011	<img src ='img/train/superficial-spreading-2.jpg' class = 'block-center rotate90'>	Training5	3	1	Melanoma
Hard to Easy	2011	<img src ='img/train/blue-nevus-29.jpg' class = 'block-center rotate270'>	Training5	4	1	Benign
Hard to Easy	2011	<img src ='img/train/superficial-spreading-8.jpg' class = 'block-center rotate270'>	Training5	5	0	Melanoma
Hard to Easy	2011	<img src ='img/train/acral-lentiginous-22.jpg' class = 'block-center rotate180'>	Training5	6	1	Melanoma
Hard to Easy	2011	<img src ='img/train/nodular-27.jpg' class = 'block-center rotate0'>	Training5	7	0	Melanoma
Hard to Easy	2011	<img src ='img/train/lentigo-28.jpg' class = 'block-center rotate90'>	Training5	8	1	Benign
Hard to Easy	2011	<img src ='img/train/superficial-spreading-40.jpg' class = 'block-center rotate270'>	Training5	9	1	Melanoma
Hard to Easy	2011	<img src ='img/train/nodular-35.jpg' class = 'block-center rotate180'>	Training5	10	1	Melanoma
Hard to Easy	2011	<img src ='img/train/blue-nevus-7.jpg' class = 'block-center rotate180'>	Training5	11	1	Benign
Hard to Easy	2011	<img src ='img/train/blue-nevus-21.jpg' class = 'block-center rotate90'>	Training5	12	1	Benign
Hard to Easy	2011	<img src ='img/train/melancocytic-nevi-17.jpg' class = 'block-center rotate270'>	Training5	13	0	Benign
Hard to Easy	2011	<img src ='img/train/acral-lentiginous-28.jpg' class = 'block-center rotate0'>	Training5	14	1	Melanoma
Hard to Easy	2011	<img src ='img/train/lentigo-27.jpg' class = 'block-center rotate180'>	Training5	15	0	Benign
Hard to Easy	2011	<img src ='img/train/melancocytic-nevi-1.jpg' class = 'block-center rotate90'>	Training5	16	1	Benign
Hard to Easy	2011	<img src ='img/train/superficial-spreading-9.png' class = 'block-center rotate0'>	Training5	17	0	Melanoma
Hard to Easy	2011	<img src ='img/train/acral-lentiginous-16.jpg' class = 'block-center rotate0'>	Training5	18	0	Melanoma
Hard to Easy	2011	<img src ='img/train/melancocytic-nevi-30.jpg' class = 'block-center rotate90'>	Training5	19	1	Benign
Hard to Easy	2011	<img src ='img/train/melancocytic-nevi-37.jpg' class = 'block-center rotate90'>	Training5	20	0	Benign
Hard to Easy	2011	<img src ='img/train/nodular-1.jpg' class = 'block-center rotate90'>	Training5	21	0	Melanoma
Hard to Easy	2011	<img src ='img/train/lentigo-33.jpg' class = 'block-center rotate180'>	Training5	22	0	Benign
Hard to Easy	2011	<img src ='img/train/lentigo-magligna-14.jpg' class = 'block-center rotate90'>	Training5	23	1	Melanoma
Hard to Easy	2011	<img src ='img/train/lentigo-13.jpg' class = 'block-center rotate0'>	Training5	24	1	Benign
Hard to Easy	2011	<img src ='img/train/acral-lentiginous-24.jpg' class = 'block-center rotate0'>	Training5	25	1	Melanoma
Hard to Easy	2011	<img src ='img/train/seborrheic-keratoses-1.jpg' class = 'block-center rotate0'>	Training5	26	0	Benign
Hard to Easy	2011	<img src ='img/train/lentigo-6.jpg' class = 'block-center rotate180'>	Training5	27	1	Benign
Hard to Easy	2011	<img src ='img/train/lentigo-23.jpg' class = 'block-center rotate90'>	Training5	28	0	Benign
Hard to Easy	2011	<img src ='img/train/seborrheic-keratoses-13.jpg' class = 'block-center rotate0'>	Training5	29	0	Benign
Hard to Easy	2011	<img src ='img/train/lentigo-magligna-15.jpg' class = 'block-center rotate180'>	Training5	30	0	Melanoma
Hard to Easy	2011	<img src ='img/train/superficial-spreading-7.jpg' class = 'block-center rotate90'>	Training5	31	0	Melanoma
Hard to Easy	2011	<img src ='img/train/lentigo-magligna-6.jpg' class = 'block-center rotate0'>	Training5	32	0	Melanoma
Hard to Easy	2011	<img src ='img/train/superficial-spreading-2.jpg' class = 'block-center rotate270'>	Training6	1	0	Melanoma
Hard to Easy	2011	<img src ='img/train/lentigo-magligna-15.jpg' class = 'block-center rotate90'>	Training6	2	1	Melanoma
Hard to Easy	2011	<img src ='img/train/melancocytic-nevi-30.jpg' class = 'block-center rotate0'>	Training6	3	1	Benign
Hard to Easy	2011	<img src ='img/train/melancocytic-nevi-1.jpg' class = 'block-center rotate270'>	Training6	4	1	Benign
Hard to Easy	2011	<img src ='img/train/seborrheic-keratoses-13.jpg' class = 'block-center rotate0'>	Training6	5	0	Benign
Hard to Easy	2011	<img src ='img/train/superficial-spreading-9.png' class = 'block-center rotate180'>	Training6	6	1	Melanoma
Hard to Easy	2011	<img src ='img/train/lentigo-magligna-14.jpg' class = 'block-center rotate270'>	Training6	7	0	Melanoma
Hard to Easy	2011	<img src ='img/train/lentigo-33.jpg' class = 'block-center rotate0'>	Training6	8	1	Benign
Hard to Easy	2011	<img src ='img/train/superficial-spreading-8.jpg' class = 'block-center rotate270'>	Training6	9	1	Melanoma
Hard to Easy	2011	<img src ='img/train/blue-nevus-21.jpg' class = 'block-center rotate0'>	Training6	10	0	Benign
Hard to Easy	2011	<img src ='img/train/lentigo-6.jpg' class = 'block-center rotate270'>	Training6	11	1	Benign
Hard to Easy	2011	<img src ='img/train/acral-lentiginous-28.jpg' class = 'block-center rotate90'>	Training6	12	0	Melanoma
Hard to Easy	2011	<img src ='img/train/nodular-27.jpg' class = 'block-center rotate270'>	Training6	13	1	Melanoma
Hard to Easy	2011	<img src ='img/train/seborrheic-keratoses-1.jpg' class = 'block-center rotate90'>	Training6	14	0	Benign
Hard to Easy	2011	<img src ='img/train/nodular-35.jpg' class = 'block-center rotate0'>	Training6	15	1	Melanoma
Hard to Easy	2011	<img src ='img/train/blue-nevus-7.jpg' class = 'block-center rotate180'>	Training6	16	0	Benign
Hard to Easy	2011	<img src ='img/train/lentigo-23.jpg' class = 'block-center rotate180'>	Training6	17	1	Benign
Hard to Easy	2011	<img src ='img/train/acral-lentiginous-16.jpg' class = 'block-center rotate180'>	Training6	18	1	Melanoma
Hard to Easy	2011	<img src ='img/train/melancocytic-nevi-17.jpg' class = 'block-center rotate0'>	Training6	19	1	Benign
Hard to Easy	2011	<img src ='img/train/nodular-1.jpg' class = 'block-center rotate90'>	Training6	20	1	Melanoma
Hard to Easy	2011	<img src ='img/train/blue-nevus-29.jpg' class = 'block-center rotate90'>	Training6	21	0	Benign
Hard to Easy	2011	<img src ='img/train/melancocytic-nevi-37.jpg' class = 'block-center rotate270'>	Training6	22	0	Benign
Hard to Easy	2011	<img src ='img/train/acral-lentiginous-24.jpg' class = 'block-center rotate180'>	Training6	23	0	Melanoma
Hard to Easy	2011	<img src ='img/train/superficial-spreading-7.jpg' class = 'block-center rotate180'>	Training6	24	1	Melanoma
Hard to Easy	2011	<img src ='img/train/lentigo-magligna-6.jpg' class = 'block-center rotate90'>	Training6	25	1	Melanoma
Hard to Easy	2011	<img src ='img/train/acral-lentiginous-22.jpg' class = 'block-center rotate180'>	Training6	26	1	Melanoma
Hard to Easy	2011	<img src ='img/train/superficial-spreading-40.jpg' class = 'block-center rotate90'>	Training6	27	0	Melanoma
Hard to Easy	2011	<img src ='img/train/lentigo-28.jpg' class = 'block-center rotate0'>	Training6	28	1	Benign
Hard to Easy	2011	<img src ='img/train/blue-nevus-2.jpg' class = 'block-center rotate180'>	Training6	29	1	Benign
Hard to Easy	2011	<img src ='img/train/lentigo-27.jpg' class = 'block-center rotate0'>	Training6	30	1	Benign
Hard to Easy	2011	<img src ='img/train/lentigo-magligna-36.jpg' class = 'block-center rotate90'>	Training6	31	1	Melanoma
Hard to Easy	2011	<img src ='img/train/lentigo-13.jpg' class = 'block-center rotate180'>	Training6	32	0	Benign
Hard to Easy	2011	<img src ='img/train/superficial-spreading-8.jpg' class = 'block-center rotate180'>	Training7	1	1	Melanoma
Hard to Easy	2011	<img src ='img/train/blue-nevus-2.jpg' class = 'block-center rotate90'>	Training7	2	1	Benign
Hard to Easy	2011	<img src ='img/train/acral-lentiginous-22.jpg' class = 'block-center rotate270'>	Training7	3	1	Melanoma
Hard to Easy	2011	<img src ='img/train/nodular-27.jpg' class = 'block-center rotate90'>	Training7	4	1	Melanoma
Hard to Easy	2011	<img src ='img/train/blue-nevus-29.jpg' class = 'block-center rotate270'>	Training7	5	0	Benign
Hard to Easy	2011	<img src ='img/train/lentigo-magligna-6.jpg' class = 'block-center rotate0'>	Training7	6	1	Melanoma
Hard to Easy	2011	<img src ='img/train/seborrheic-keratoses-1.jpg' class = 'block-center rotate180'>	Training7	7	0	Benign
Hard to Easy	2011	<img src ='img/train/superficial-spreading-2.jpg' class = 'block-center rotate270'>	Training7	8	1	Melanoma
Hard to Easy	2011	<img src ='img/train/lentigo-27.jpg' class = 'block-center rotate270'>	Training7	9	0	Benign
Hard to Easy	2011	<img src ='img/train/acral-lentiginous-16.jpg' class = 'block-center rotate0'>	Training7	10	0	Melanoma
Hard to Easy	2011	<img src ='img/train/seborrheic-keratoses-13.jpg' class = 'block-center rotate0'>	Training7	11	1	Benign
Hard to Easy	2011	<img src ='img/train/lentigo-magligna-36.jpg' class = 'block-center rotate0'>	Training7	12	1	Melanoma
Hard to Easy	2011	<img src ='img/train/lentigo-magligna-14.jpg' class = 'block-center rotate180'>	Training7	13	0	Melanoma
Hard to Easy	2011	<img src ='img/train/melancocytic-nevi-37.jpg' class = 'block-center rotate90'>	Training7	14	0	Benign
Hard to Easy	2011	<img src ='img/train/melancocytic-nevi-30.jpg' class = 'block-center rotate0'>	Training7	15	0	Benign
Hard to Easy	2011	<img src ='img/train/superficial-spreading-40.jpg' class = 'block-center rotate270'>	Training7	16	1	Melanoma
Hard to Easy	2011	<img src ='img/train/lentigo-6.jpg' class = 'block-center rotate180'>	Training7	17	1	Benign
Hard to Easy	2011	<img src ='img/train/melancocytic-nevi-1.jpg' class = 'block-center rotate0'>	Training7	18	1	Benign
Hard to Easy	2011	<img src ='img/train/nodular-1.jpg' class = 'block-center rotate0'>	Training7	19	0	Melanoma
Hard to Easy	2011	<img src ='img/train/melancocytic-nevi-17.jpg' class = 'block-center rotate180'>	Training7	20	0	Benign
Hard to Easy	2011	<img src ='img/train/blue-nevus-7.jpg' class = 'block-center rotate90'>	Training7	21	1	Benign
Hard to Easy	2011	<img src ='img/train/nodular-35.jpg' class = 'block-center rotate0'>	Training7	22	1	Melanoma
Hard to Easy	2011	<img src ='img/train/acral-lentiginous-24.jpg' class = 'block-center rotate180'>	Training7	23	1	Melanoma
Hard to Easy	2011	<img src ='img/train/lentigo-28.jpg' class = 'block-center rotate270'>	Training7	24	1	Benign
Hard to Easy	2011	<img src ='img/train/lentigo-23.jpg' class = 'block-center rotate0'>	Training7	25	1	Benign
Hard to Easy	2011	<img src ='img/train/lentigo-33.jpg' class = 'block-center rotate0'>	Training7	26	0	Benign
Hard to Easy	2011	<img src ='img/train/lentigo-13.jpg' class = 'block-center rotate0'>	Training7	27	1	Benign
Hard to Easy	2011	<img src ='img/train/blue-nevus-21.jpg' class = 'block-center rotate0'>	Training7	28	0	Benign
Hard to Easy	2011	<img src ='img/train/lentigo-magligna-15.jpg' class = 'block-center rotate0'>	Training7	29	1	Melanoma
Hard to Easy	2011	<img src ='img/train/superficial-spreading-7.jpg' class = 'block-center rotate90'>	Training7	30	1	Melanoma
Hard to Easy	2011	<img src ='img/train/acral-lentiginous-28.jpg' class = 'block-center rotate0'>	Training7	31	1	Melanoma
Hard to Easy	2011	<img src ='img/train/superficial-spreading-9.png' class = 'block-center rotate90'>	Training7	32	0	Melanoma
Hard to Easy	2011	<img src ='img/train/melancocytic-nevi-37.jpg' class = 'block-center rotate180'>	Training8	1	1	Benign
Hard to Easy	2011	<img src ='img/train/lentigo-27.jpg' class = 'block-center rotate0'>	Training8	2	1	Benign
Hard to Easy	2011	<img src ='img/train/acral-lentiginous-24.jpg' class = 'block-center rotate0'>	Training8	3	1	Melanoma
Hard to Easy	2011	<img src ='img/train/acral-lentiginous-28.jpg' class = 'block-center rotate180'>	Training8	4	1	Melanoma
Hard to Easy	2011	<img src ='img/train/lentigo-13.jpg' class = 'block-center rotate180'>	Training8	5	1	Benign
Hard to Easy	2011	<img src ='img/train/melancocytic-nevi-1.jpg' class = 'block-center rotate0'>	Training8	6	1	Benign
Hard to Easy	2011	<img src ='img/train/superficial-spreading-9.png' class = 'block-center rotate0'>	Training8	7	1	Melanoma
Hard to Easy	2011	<img src ='img/train/seborrheic-keratoses-13.jpg' class = 'block-center rotate0'>	Training8	8	1	Benign
Hard to Easy	2011	<img src ='img/train/lentigo-magligna-15.jpg' class = 'block-center rotate180'>	Training8	9	1	Melanoma
Hard to Easy	2011	<img src ='img/train/nodular-35.jpg' class = 'block-center rotate0'>	Training8	10	0	Melanoma
Hard to Easy	2011	<img src ='img/train/lentigo-magligna-14.jpg' class = 'block-center rotate90'>	Training8	11	1	Melanoma
Hard to Easy	2011	<img src ='img/train/melancocytic-nevi-17.jpg' class = 'block-center rotate180'>	Training8	12	0	Benign
Hard to Easy	2011	<img src ='img/train/blue-nevus-21.jpg' class = 'block-center rotate270'>	Training8	13	1	Benign
Hard to Easy	2011	<img src ='img/train/lentigo-33.jpg' class = 'block-center rotate180'>	Training8	14	1	Benign
Hard to Easy	2011	<img src ='img/train/acral-lentiginous-16.jpg' class = 'block-center rotate180'>	Training8	15	0	Melanoma
Hard to Easy	2011	<img src ='img/train/blue-nevus-29.jpg' class = 'block-center rotate180'>	Training8	16	0	Benign
Hard to Easy	2011	<img src ='img/train/lentigo-magligna-36.jpg' class = 'block-center rotate90'>	Training8	17	1	Melanoma
Hard to Easy	2011	<img src ='img/train/superficial-spreading-2.jpg' class = 'block-center rotate180'>	Training8	18	0	Melanoma
Hard to Easy	2011	<img src ='img/train/blue-nevus-2.jpg' class = 'block-center rotate0'>	Training8	19	1	Benign
Hard to Easy	2011	<img src ='img/train/lentigo-23.jpg' class = 'block-center rotate270'>	Training8	20	1	Benign
Hard to Easy	2011	<img src ='img/train/nodular-27.jpg' class = 'block-center rotate0'>	Training8	21	1	Melanoma
Hard to Easy	2011	<img src ='img/train/nodular-1.jpg' class = 'block-center rotate270'>	Training8	22	1	Melanoma
Hard to Easy	2011	<img src ='img/train/seborrheic-keratoses-1.jpg' class = 'block-center rotate0'>	Training8	23	1	Benign
Hard to Easy	2011	<img src ='img/train/superficial-spreading-7.jpg' class = 'block-center rotate0'>	Training8	24	1	Melanoma
Hard to Easy	2011	<img src ='img/train/superficial-spreading-8.jpg' class = 'block-center rotate0'>	Training8	25	1	Melanoma
Hard to Easy	2011	<img src ='img/train/lentigo-magligna-6.jpg' class = 'block-center rotate0'>	Training8	26	0	Melanoma
Hard to Easy	2011	<img src ='img/train/superficial-spreading-40.jpg' class = 'block-center rotate180'>	Training8	27	1	Melanoma
Hard to Easy	2011	<img src ='img/train/lentigo-28.jpg' class = 'block-center rotate180'>	Training8	28	1	Benign
Hard to Easy	2011	<img src ='img/train/acral-lentiginous-22.jpg' class = 'block-center rotate90'>	Training8	29	1	Melanoma
Hard to Easy	2011	<img src ='img/train/lentigo-6.jpg' class = 'block-center rotate0'>	Training8	30	1	Benign
Hard to Easy	2011	<img src ='img/train/blue-nevus-7.jpg' class = 'block-center rotate90'>	Training8	31	1	Benign
Hard to Easy	2011	<img src ='img/train/melancocytic-nevi-30.jpg' class = 'block-center rotate0'>	Training8	32	0	Benign
Hard to Easy	2011	<img src ='img/train/melancocytic-nevi-3.jpg' class = 'block-center rotate180'>	Training9	1	0	Benign
Hard to Easy	2011	<img src ='img/train/lentigo-magligna-1.jpg' class = 'block-center rotate270'>	Training9	2	1	Melanoma
Hard to Easy	2011	<img src ='img/train/seborrheic-keratoses-9.jpg' class = 'block-center rotate0'>	Training9	3	1	Benign
Hard to Easy	2011	<img src ='img/train/lentigo-magligna-41.jpg' class = 'block-center rotate270'>	Training9	4	1	Melanoma
Hard to Easy	2011	<img src ='img/train/seborrheic-keratoses-2.jpg' class = 'block-center rotate270'>	Training9	5	0	Benign
Hard to Easy	2011	<img src ='img/train/superficial-spreading-1.jpg' class = 'block-center rotate270'>	Training9	6	1	Melanoma
Hard to Easy	2011	<img src ='img/train/nodular-11.jpg' class = 'block-center rotate0'>	Training9	7	0	Melanoma
Hard to Easy	2011	<img src ='img/train/seborrheic-keratoses-33.jpg' class = 'block-center rotate270'>	Training9	8	1	Benign
Hard to Easy	2011	<img src ='img/train/melancocytic-nevi-4.jpg' class = 'block-center rotate270'>	Training9	9	0	Benign
Hard to Easy	2011	<img src ='img/train/superficial-spreading-26.jpg' class = 'block-center rotate0'>	Training9	10	1	Melanoma
Hard to Easy	2011	<img src ='img/train/acral-lentiginous-37.jpg' class = 'block-center rotate270'>	Training9	11	1	Melanoma
Hard to Easy	2011	<img src ='img/train/melancocytic-nevi-13.jpg' class = 'block-center rotate90'>	Training9	12	0	Benign
Hard to Easy	2011	<img src ='img/train/acral-lentiginous-14.jpg' class = 'block-center rotate270'>	Training9	13	1	Melanoma
Hard to Easy	2011	<img src ='img/train/seborrheic-keratoses-30.jpg' class = 'block-center rotate270'>	Training9	14	1	Benign
Hard to Easy	2011	<img src ='img/train/blue-nevus-17.jpg' class = 'block-center rotate270'>	Training9	15	0	Benign
Hard to Easy	2011	<img src ='img/train/melancocytic-nevi-20.jpg' class = 'block-center rotate90'>	Training9	16	1	Benign
Hard to Easy	2011	<img src ='img/train/superficial-spreading-16.jpg' class = 'block-center rotate270'>	Training9	17	1	Melanoma
Hard to Easy	2011	<img src ='img/train/blue-nevus-30.jpg' class = 'block-center rotate0'>	Training9	18	1	Benign
Hard to Easy	2011	<img src ='img/train/seborrheic-keratoses-10.jpg' class = 'block-center rotate0'>	Training9	19	0	Benign
Hard to Easy	2011	<img src ='img/train/lentigo-magligna-10.jpg' class = 'block-center rotate90'>	Training9	20	1	Melanoma
Hard to Easy	2011	<img src ='img/train/seborrheic-keratoses-5.jpg' class = 'block-center rotate0'>	Training9	21	1	Benign
Hard to Easy	2011	<img src ='img/train/melancocytic-nevi-9.jpg' class = 'block-center rotate90'>	Training9	22	0	Benign
Hard to Easy	2011	<img src ='img/train/acral-lentiginous-20.jpg' class = 'block-center rotate0'>	Training9	23	1	Melanoma
Hard to Easy	2011	<img src ='img/train/lentigo-magligna-33.jpg' class = 'block-center rotate270'>	Training9	24	1	Melanoma
Hard to Easy	2011	<img src ='img/train/superficial-spreading-19.jpg' class = 'block-center rotate270'>	Training9	25	1	Melanoma
Hard to Easy	2011	<img src ='img/train/melancocytic-nevi-12.jpg' class = 'block-center rotate90'>	Training9	26	1	Benign
Hard to Easy	2011	<img src ='img/train/blue-nevus-11.jpg' class = 'block-center rotate90'>	Training9	27	1	Benign
Hard to Easy	2011	<img src ='img/train/seborrheic-keratoses-18.jpg' class = 'block-center rotate270'>	Training9	28	1	Benign
Hard to Easy	2011	<img src ='img/train/superficial-spreading-38.jpg' class = 'block-center rotate0'>	Training9	29	1	Melanoma
Hard to Easy	2011	<img src ='img/train/acral-lentiginous-4.jpg' class = 'block-center rotate180'>	Training9	30	1	Melanoma
Hard to Easy	2011	<img src ='img/train/nodular-8.jpg' class = 'block-center rotate0'>	Training9	31	1	Melanoma
Hard to Easy	2011	<img src ='img/train/acral-lentiginous-5.jpg' class = 'block-center rotate90'>	Training9	32	1	Melanoma
Hard to Easy	2011	<img src ='img/train/acral-lentiginous-5.jpg' class = 'block-center rotate270'>	Training10	1	1	Melanoma
Hard to Easy	2011	<img src ='img/train/seborrheic-keratoses-2.jpg' class = 'block-center rotate0'>	Training10	2	1	Benign
Hard to Easy	2011	<img src ='img/train/acral-lentiginous-14.jpg' class = 'block-center rotate180'>	Training10	3	1	Melanoma
Hard to Easy	2011	<img src ='img/train/melancocytic-nevi-3.jpg' class = 'block-center rotate90'>	Training10	4	1	Benign
Hard to Easy	2011	<img src ='img/train/melancocytic-nevi-13.jpg' class = 'block-center rotate90'>	Training10	5	1	Benign
Hard to Easy	2011	<img src ='img/train/melancocytic-nevi-9.jpg' class = 'block-center rotate90'>	Training10	6	1	Benign
Hard to Easy	2011	<img src ='img/train/seborrheic-keratoses-9.jpg' class = 'block-center rotate270'>	Training10	7	0	Benign
Hard to Easy	2011	<img src ='img/train/melancocytic-nevi-20.jpg' class = 'block-center rotate180'>	Training10	8	0	Benign
Hard to Easy	2011	<img src ='img/train/blue-nevus-17.jpg' class = 'block-center rotate0'>	Training10	9	1	Benign
Hard to Easy	2011	<img src ='img/train/melancocytic-nevi-4.jpg' class = 'block-center rotate90'>	Training10	10	1	Benign
Hard to Easy	2011	<img src ='img/train/nodular-8.jpg' class = 'block-center rotate270'>	Training10	11	1	Melanoma
Hard to Easy	2011	<img src ='img/train/lentigo-magligna-1.jpg' class = 'block-center rotate270'>	Training10	12	1	Melanoma
Hard to Easy	2011	<img src ='img/train/blue-nevus-30.jpg' class = 'block-center rotate270'>	Training10	13	1	Benign
Hard to Easy	2011	<img src ='img/train/superficial-spreading-16.jpg' class = 'block-center rotate0'>	Training10	14	1	Melanoma
Hard to Easy	2011	<img src ='img/train/lentigo-magligna-41.jpg' class = 'block-center rotate180'>	Training10	15	1	Melanoma
Hard to Easy	2011	<img src ='img/train/acral-lentiginous-4.jpg' class = 'block-center rotate90'>	Training10	16	1	Melanoma
Hard to Easy	2011	<img src ='img/train/seborrheic-keratoses-30.jpg' class = 'block-center rotate270'>	Training10	17	1	Benign
Hard to Easy	2011	<img src ='img/train/lentigo-magligna-33.jpg' class = 'block-center rotate0'>	Training10	18	1	Melanoma
Hard to Easy	2011	<img src ='img/train/superficial-spreading-38.jpg' class = 'block-center rotate0'>	Training10	19	1	Melanoma
Hard to Easy	2011	<img src ='img/train/nodular-11.jpg' class = 'block-center rotate90'>	Training10	20	1	Melanoma
Hard to Easy	2011	<img src ='img/train/lentigo-magligna-10.jpg' class = 'block-center rotate90'>	Training10	21	1	Melanoma
Hard to Easy	2011	<img src ='img/train/acral-lentiginous-37.jpg' class = 'block-center rotate180'>	Training10	22	1	Melanoma
Hard to Easy	2011	<img src ='img/train/acral-lentiginous-20.jpg' class = 'block-center rotate90'>	Training10	23	1	Melanoma
Hard to Easy	2011	<img src ='img/train/seborrheic-keratoses-10.jpg' class = 'block-center rotate90'>	Training10	24	0	Benign
Hard to Easy	2011	<img src ='img/train/blue-nevus-11.jpg' class = 'block-center rotate90'>	Training10	25	1	Benign
Hard to Easy	2011	<img src ='img/train/seborrheic-keratoses-33.jpg' class = 'block-center rotate270'>	Training10	26	1	Benign
Hard to Easy	2011	<img src ='img/train/superficial-spreading-26.jpg' class = 'block-center rotate270'>	Training10	27	1	Melanoma
Hard to Easy	2011	<img src ='img/train/seborrheic-keratoses-18.jpg' class = 'block-center rotate0'>	Training10	28	1	Benign
Hard to Easy	2011	<img src ='img/train/seborrheic-keratoses-5.jpg' class = 'block-center rotate270'>	Training10	29	1	Benign
Hard to Easy	2011	<img src ='img/train/superficial-spreading-1.jpg' class = 'block-center rotate180'>	Training10	30	1	Melanoma
Hard to Easy	2011	<img src ='img/train/melancocytic-nevi-12.jpg' class = 'block-center rotate270'>	Training10	31	0	Benign
Hard to Easy	2011	<img src ='img/train/superficial-spreading-19.jpg' class = 'block-center rotate90'>	Training10	32	1	Melanoma
Hard to Easy	2011	<img src ='img/train/acral-lentiginous-5.jpg' class = 'block-center rotate180'>	Training11	1	1	Melanoma
Hard to Easy	2011	<img src ='img/train/blue-nevus-30.jpg' class = 'block-center rotate270'>	Training11	2	1	Benign
Hard to Easy	2011	<img src ='img/train/melancocytic-nevi-4.jpg' class = 'block-center rotate0'>	Training11	3	1	Benign
Hard to Easy	2011	<img src ='img/train/lentigo-magligna-10.jpg' class = 'block-center rotate270'>	Training11	4	1	Melanoma
Hard to Easy	2011	<img src ='img/train/nodular-8.jpg' class = 'block-center rotate180'>	Training11	5	1	Melanoma
Hard to Easy	2011	<img src ='img/train/seborrheic-keratoses-2.jpg' class = 'block-center rotate0'>	Training11	6	1	Benign
Hard to Easy	2011	<img src ='img/train/lentigo-magligna-33.jpg' class = 'block-center rotate90'>	Training11	7	1	Melanoma
Hard to Easy	2011	<img src ='img/train/melancocytic-nevi-13.jpg' class = 'block-center rotate180'>	Training11	8	1	Benign
Hard to Easy	2011	<img src ='img/train/superficial-spreading-19.jpg' class = 'block-center rotate0'>	Training11	9	1	Melanoma
Hard to Easy	2011	<img src ='img/train/melancocytic-nevi-3.jpg' class = 'block-center rotate0'>	Training11	10	1	Benign
Hard to Easy	2011	<img src ='img/train/seborrheic-keratoses-5.jpg' class = 'block-center rotate90'>	Training11	11	1	Benign
Hard to Easy	2011	<img src ='img/train/superficial-spreading-38.jpg' class = 'block-center rotate90'>	Training11	12	1	Melanoma
Hard to Easy	2011	<img src ='img/train/seborrheic-keratoses-30.jpg' class = 'block-center rotate180'>	Training11	13	1	Benign
Hard to Easy	2011	<img src ='img/train/lentigo-magligna-1.jpg' class = 'block-center rotate0'>	Training11	14	1	Melanoma
Hard to Easy	2011	<img src ='img/train/seborrheic-keratoses-10.jpg' class = 'block-center rotate180'>	Training11	15	1	Benign
Hard to Easy	2011	<img src ='img/train/acral-lentiginous-20.jpg' class = 'block-center rotate180'>	Training11	16	1	Melanoma
Hard to Easy	2011	<img src ='img/train/acral-lentiginous-37.jpg' class = 'block-center rotate270'>	Training11	17	1	Melanoma
Hard to Easy	2011	<img src ='img/train/seborrheic-keratoses-9.jpg' class = 'block-center rotate270'>	Training11	18	1	Benign
Hard to Easy	2011	<img src ='img/train/superficial-spreading-1.jpg' class = 'block-center rotate180'>	Training11	19	1	Melanoma
Hard to Easy	2011	<img src ='img/train/acral-lentiginous-4.jpg' class = 'block-center rotate0'>	Training11	20	1	Melanoma
Hard to Easy	2011	<img src ='img/train/superficial-spreading-26.jpg' class = 'block-center rotate90'>	Training11	21	1	Melanoma
Hard to Easy	2011	<img src ='img/train/nodular-11.jpg' class = 'block-center rotate90'>	Training11	22	1	Melanoma
Hard to Easy	2011	<img src ='img/train/blue-nevus-17.jpg' class = 'block-center rotate180'>	Training11	23	1	Benign
Hard to Easy	2011	<img src ='img/train/seborrheic-keratoses-18.jpg' class = 'block-center rotate0'>	Training11	24	1	Benign
Hard to Easy	2011	<img src ='img/train/lentigo-magligna-41.jpg' class = 'block-center rotate0'>	Training11	25	1	Melanoma
Hard to Easy	2011	<img src ='img/train/melancocytic-nevi-20.jpg' class = 'block-center rotate90'>	Training11	26	1	Benign
Hard to Easy	2011	<img src ='img/train/seborrheic-keratoses-33.jpg' class = 'block-center rotate180'>	Training11	27	1	Benign
Hard to Easy	2011	<img src ='img/train/superficial-spreading-16.jpg' class = 'block-center rotate90'>	Training11	28	1	Melanoma
Hard to Easy	2011	<img src ='img/train/acral-lentiginous-14.jpg' class = 'block-center rotate90'>	Training11	29	1	Melanoma
Hard to Easy	2011	<img src ='img/train/melancocytic-nevi-9.jpg' class = 'block-center rotate180'>	Training11	30	1	Benign
Hard to Easy	2011	<img src ='img/train/blue-nevus-11.jpg' class = 'block-center rotate0'>	Training11	31	1	Benign
Hard to Easy	2011	<img src ='img/train/melancocytic-nevi-12.jpg' class = 'block-center rotate90'>	Training11	32	1	Benign
Hard to Easy	2011	<img src ='img/train/seborrheic-keratoses-33.jpg' class = 'block-center rotate270'>	Training12	1	1	Benign
Hard to Easy	2011	<img src ='img/train/superficial-spreading-16.jpg' class = 'block-center rotate0'>	Training12	2	1	Melanoma
Hard to Easy	2011	<img src ='img/train/superficial-spreading-19.jpg' class = 'block-center rotate180'>	Training12	3	1	Melanoma
Hard to Easy	2011	<img src ='img/train/nodular-11.jpg' class = 'block-center rotate90'>	Training12	4	1	Melanoma
Hard to Easy	2011	<img src ='img/train/lentigo-magligna-33.jpg' class = 'block-center rotate180'>	Training12	5	1	Melanoma
Hard to Easy	2011	<img src ='img/train/melancocytic-nevi-13.jpg' class = 'block-center rotate270'>	Training12	6	1	Benign
Hard to Easy	2011	<img src ='img/train/seborrheic-keratoses-30.jpg' class = 'block-center rotate90'>	Training12	7	1	Benign
Hard to Easy	2011	<img src ='img/train/blue-nevus-11.jpg' class = 'block-center rotate90'>	Training12	8	1	Benign
Hard to Easy	2011	<img src ='img/train/seborrheic-keratoses-9.jpg' class = 'block-center rotate90'>	Training12	9	1	Benign
Hard to Easy	2011	<img src ='img/train/melancocytic-nevi-4.jpg' class = 'block-center rotate0'>	Training12	10	1	Benign
Hard to Easy	2011	<img src ='img/train/acral-lentiginous-5.jpg' class = 'block-center rotate90'>	Training12	11	1	Melanoma
Hard to Easy	2011	<img src ='img/train/seborrheic-keratoses-10.jpg' class = 'block-center rotate90'>	Training12	12	1	Benign
Hard to Easy	2011	<img src ='img/train/lentigo-magligna-1.jpg' class = 'block-center rotate0'>	Training12	13	1	Melanoma
Hard to Easy	2011	<img src ='img/train/acral-lentiginous-37.jpg' class = 'block-center rotate180'>	Training12	14	1	Melanoma
Hard to Easy	2011	<img src ='img/train/superficial-spreading-26.jpg' class = 'block-center rotate180'>	Training12	15	1	Melanoma
Hard to Easy	2011	<img src ='img/train/lentigo-magligna-10.jpg' class = 'block-center rotate90'>	Training12	16	1	Melanoma
Hard to Easy	2011	<img src ='img/train/seborrheic-keratoses-2.jpg' class = 'block-center rotate0'>	Training12	17	1	Benign
Hard to Easy	2011	<img src ='img/train/melancocytic-nevi-3.jpg' class = 'block-center rotate180'>	Training12	18	1	Benign
Hard to Easy	2011	<img src ='img/train/superficial-spreading-38.jpg' class = 'block-center rotate0'>	Training12	19	1	Melanoma
Hard to Easy	2011	<img src ='img/train/seborrheic-keratoses-5.jpg' class = 'block-center rotate180'>	Training12	20	1	Benign
Hard to Easy	2011	<img src ='img/train/superficial-spreading-1.jpg' class = 'block-center rotate90'>	Training12	21	1	Melanoma
Hard to Easy	2011	<img src ='img/train/blue-nevus-17.jpg' class = 'block-center rotate90'>	Training12	22	1	Benign
Hard to Easy	2011	<img src ='img/train/acral-lentiginous-20.jpg' class = 'block-center rotate0'>	Training12	23	1	Melanoma
Hard to Easy	2011	<img src ='img/train/melancocytic-nevi-12.jpg' class = 'block-center rotate0'>	Training12	24	1	Benign
Hard to Easy	2011	<img src ='img/train/melancocytic-nevi-9.jpg' class = 'block-center rotate0'>	Training12	25	1	Benign
Hard to Easy	2011	<img src ='img/train/lentigo-magligna-41.jpg' class = 'block-center rotate180'>	Training12	26	1	Melanoma
Hard to Easy	2011	<img src ='img/train/acral-lentiginous-14.jpg' class = 'block-center rotate0'>	Training12	27	1	Melanoma
Hard to Easy	2011	<img src ='img/train/acral-lentiginous-4.jpg' class = 'block-center rotate270'>	Training12	28	1	Melanoma
Hard to Easy	2011	<img src ='img/train/nodular-8.jpg' class = 'block-center rotate270'>	Training12	29	1	Melanoma
Hard to Easy	2011	<img src ='img/train/seborrheic-keratoses-18.jpg' class = 'block-center rotate90'>	Training12	30	1	Benign
Hard to Easy	2011	<img src ='img/train/blue-nevus-30.jpg' class = 'block-center rotate0'>	Training12	31	1	Benign
Hard to Easy	2011	<img src ='img/train/melancocytic-nevi-20.jpg' class = 'block-center rotate0'>	Training12	32	1	Benign
Hard to Easy	2011	img/test/lentigo-magligna-5.jpg	posttest	1	0	Melanoma
Hard to Easy	2011	img/test/superficial-spreading-15.jpg	posttest	2	1	Melanoma
Hard to Easy	2011	img/test/seborrheic-keratoses-6.jpg	posttest	3	1	Benign
Hard to Easy	2011	img/test/lentigo-3.jpg	posttest	4	0	Benign
Hard to Easy	2011	img/test/seborrheic-keratoses-31.jpg	posttest	5	1	Benign
Hard to Easy	2011	img/test/blue-nevus-15.jpg	posttest	6	1	Benign
Hard to Easy	2011	img/test/blue-nevus-1.jpg	posttest	7	1	Benign
Hard to Easy	2011	img/test/acral-lentiginous-15.jpg	posttest	8	1	Melanoma
Hard to Easy	2011	img/test/lentigo-8.jpg	posttest	9	0	Benign
Hard to Easy	2011	img/test/nodular-17.jpg	posttest	10	1	Melanoma
Hard to Easy	2011	img/test/blue-nevus-4.jpg	posttest	11	1	Benign
Hard to Easy	2011	img/test/melancocytic-nevi-14.jpg	posttest	12	1	Benign
Hard to Easy	2011	img/test/melancocytic-nevi-2.jpg	posttest	13	1	Benign
Hard to Easy	2011	img/test/lentigo-magligna-22.jpg	posttest	14	1	Melanoma
Hard to Easy	2011	img/test/lentigo-36.jpg	posttest	15	0	Benign
Hard to Easy	2011	img/test/lentigo-20.jpg	posttest	16	1	Benign
Hard to Easy	2011	img/test/nodular-25.jpg	posttest	17	1	Melanoma
Hard to Easy	2011	img/test/lentigo-26.jpg	posttest	18	1	Benign
Hard to Easy	2011	img/test/nodular-34.jpg	posttest	19	0	Melanoma
Hard to Easy	2011	img/test/seborrheic-keratoses-27.jpg	posttest	20	1	Benign
Hard to Easy	2011	img/test/melancocytic-nevi-6.jpg	posttest	21	0	Benign
Hard to Easy	2011	img/test/acral-lentiginous-34.jpg	posttest	22	1	Melanoma
Hard to Easy	2011	img/test/melancocytic-nevi-21.jpg	posttest	23	1	Benign
Hard to Easy	2011	img/test/melancocytic-nevi-16.jpg	posttest	24	1	Benign
Hard to Easy	2011	img/test/superficial-spreading-13.jpg	posttest	25	1	Melanoma
Hard to Easy	2011	img/test/nodular-3.jpg	posttest	26	1	Melanoma
Hard to Easy	2011	img/test/blue-nevus-34.jpg	posttest	27	1	Benign
Hard to Easy	2011	img/test/acral-lentiginous-6.jpg	posttest	28	1	Melanoma
Hard to Easy	2011	img/test/blue-nevus-12.jpg	posttest	29	1	Benign
Hard to Easy	2011	img/test/acral-lentiginous-40.jpg	posttest	30	1	Melanoma
Hard to Easy	2011	img/test/lentigo-magligna-18.jpg	posttest	31	1	Melanoma
Hard to Easy	2011	img/test/lentigo-magligna-11.jpg	posttest	32	1	Melanoma
Hard to Easy	2011	img/test/acral-lentiginous-11.jpg	posttest	33	1	Melanoma
Hard to Easy	2011	img/test/lentigo-magligna-24.jpg	posttest	34	0	Melanoma
Hard to Easy	2011	img/test/lentigo-17.jpg	posttest	35	0	Benign
Hard to Easy	2011	img/test/nodular-24.jpg	posttest	36	1	Melanoma
Hard to Easy	2011	img/test/seborrheic-keratoses-7.jpg	posttest	37	1	Benign
Hard to Easy	2011	img/test/seborrheic-keratoses-25.jpg	posttest	38	1	Benign
Hard to Easy	2011	img/test/superficial-spreading-22.jpg	posttest	39	0	Melanoma
Hard to Easy	2011	img/test/superficial-spreading-31.jpg	posttest	40	1	Melanoma
Hard to Easy	2011	img/test/acral-lentiginous-2.gif	posttest	41	1	Melanoma
Hard to Easy	2011	img/test/superficial-spreading-28.jpg	posttest	42	1	Melanoma
Hard to Easy	2011	img/test/melancocytic-nevi-39.jpg	posttest	43	1	Benign
Hard to Easy	2011	img/test/blue-nevus-27.jpg	posttest	44	1	Benign
Hard to Easy	2011	img/test/lentigo-magligna-19.jpg	posttest	45	0	Melanoma
Hard to Easy	2011	img/test/superficial-spreading-39.jpg	posttest	46	1	Melanoma
Hard to Easy	2011	img/test/nodular-4.jpg	posttest	47	1	Melanoma
Hard to Easy	2011	img/test/seborrheic-keratoses-17.jpg	posttest	48	1	Benign
Easy to Hard	1013	img/test/nodular-3.jpg	pretest	1	1	Melanoma
Easy to Hard	1013	img/test/melancocytic-nevi-39.jpg	pretest	2	1	Benign
Easy to Hard	1013	img/test/nodular-4.jpg	pretest	3	1	Melanoma
Easy to Hard	1013	img/test/blue-nevus-1.jpg	pretest	4	1	Benign
Easy to Hard	1013	img/test/lentigo-magligna-24.jpg	pretest	5	0	Melanoma
Easy to Hard	1013	img/test/seborrheic-keratoses-27.jpg	pretest	6	1	Benign
Easy to Hard	1013	img/test/acral-lentiginous-2.gif	pretest	7	1	Melanoma
Easy to Hard	1013	img/test/melancocytic-nevi-6.jpg	pretest	8	0	Benign
Easy to Hard	1013	img/test/superficial-spreading-22.jpg	pretest	9	1	Melanoma
Easy to Hard	1013	img/test/lentigo-36.jpg	pretest	10	0	Benign
Easy to Hard	1013	img/test/acral-lentiginous-40.jpg	pretest	11	1	Melanoma
Easy to Hard	1013	img/test/seborrheic-keratoses-17.jpg	pretest	12	0	Benign
Easy to Hard	1013	img/test/melancocytic-nevi-21.jpg	pretest	13	0	Benign
Easy to Hard	1013	img/test/blue-nevus-27.jpg	pretest	14	0	Benign
Easy to Hard	1013	img/test/lentigo-magligna-5.jpg	pretest	15	1	Melanoma
Easy to Hard	1013	img/test/lentigo-20.jpg	pretest	16	1	Benign
Easy to Hard	1013	img/test/acral-lentiginous-15.jpg	pretest	17	1	Melanoma
Easy to Hard	1013	img/test/acral-lentiginous-6.jpg	pretest	18	1	Melanoma
Easy to Hard	1013	img/test/blue-nevus-12.jpg	pretest	19	0	Benign
Easy to Hard	1013	img/test/nodular-24.jpg	pretest	20	0	Melanoma
Easy to Hard	1013	img/test/blue-nevus-4.jpg	pretest	21	0	Benign
Easy to Hard	1013	img/test/superficial-spreading-28.jpg	pretest	22	1	Melanoma
Easy to Hard	1013	img/test/acral-lentiginous-34.jpg	pretest	23	1	Melanoma
Easy to Hard	1013	img/test/superficial-spreading-31.jpg	pretest	24	1	Melanoma
Easy to Hard	1013	img/test/melancocytic-nevi-16.jpg	pretest	25	1	Benign
Easy to Hard	1013	img/test/nodular-34.jpg	pretest	26	0	Melanoma
Easy to Hard	1013	img/test/seborrheic-keratoses-31.jpg	pretest	27	0	Benign
Easy to Hard	1013	img/test/blue-nevus-34.jpg	pretest	28	1	Benign
Easy to Hard	1013	img/test/lentigo-magligna-22.jpg	pretest	29	0	Melanoma
Easy to Hard	1013	img/test/lentigo-magligna-11.jpg	pretest	30	0	Melanoma
Easy to Hard	1013	img/test/nodular-17.jpg	pretest	31	0	Melanoma
Easy to Hard	1013	img/test/acral-lentiginous-11.jpg	pretest	32	0	Melanoma
Easy to Hard	1013	img/test/lentigo-3.jpg	pretest	33	1	Benign
Easy to Hard	1013	img/test/melancocytic-nevi-14.jpg	pretest	34	0	Benign
Easy to Hard	1013	img/test/seborrheic-keratoses-6.jpg	pretest	35	0	Benign
Easy to Hard	1013	img/test/nodular-25.jpg	pretest	36	1	Melanoma
Easy to Hard	1013	img/test/superficial-spreading-15.jpg	pretest	37	1	Melanoma
Easy to Hard	1013	img/test/seborrheic-keratoses-25.jpg	pretest	38	0	Benign
Easy to Hard	1013	img/test/blue-nevus-15.jpg	pretest	39	0	Benign
Easy to Hard	1013	img/test/lentigo-26.jpg	pretest	40	0	Benign
Easy to Hard	1013	img/test/melancocytic-nevi-2.jpg	pretest	41	1	Benign
Easy to Hard	1013	img/test/lentigo-magligna-19.jpg	pretest	42	1	Melanoma
Easy to Hard	1013	img/test/lentigo-17.jpg	pretest	43	0	Benign
Easy to Hard	1013	img/test/lentigo-magligna-18.jpg	pretest	44	0	Melanoma
Easy to Hard	1013	img/test/superficial-spreading-39.jpg	pretest	45	1	Melanoma
Easy to Hard	1013	img/test/superficial-spreading-13.jpg	pretest	46	0	Melanoma
Easy to Hard	1013	img/test/lentigo-8.jpg	pretest	47	1	Benign
Easy to Hard	1013	img/test/seborrheic-keratoses-7.jpg	pretest	48	0	Benign
Easy to Hard	1013	<img src ='img/train/seborrheic-keratoses-33.jpg' class = 'block-center rotate90'>	Training1	1	0	Benign
Easy to Hard	1013	<img src ='img/train/nodular-11.jpg' class = 'block-center rotate0'>	Training1	2	1	Melanoma
Easy to Hard	1013	<img src ='img/train/blue-nevus-30.jpg' class = 'block-center rotate0'>	Training1	3	1	Benign
Easy to Hard	1013	<img src ='img/train/lentigo-magligna-33.jpg' class = 'block-center rotate90'>	Training1	4	1	Melanoma
Easy to Hard	1013	<img src ='img/train/superficial-spreading-16.jpg' class = 'block-center rotate0'>	Training1	5	1	Melanoma
Easy to Hard	1013	<img src ='img/train/melancocytic-nevi-4.jpg' class = 'block-center rotate270'>	Training1	6	1	Benign
Easy to Hard	1013	<img src ='img/train/lentigo-magligna-1.jpg' class = 'block-center rotate180'>	Training1	7	1	Melanoma
Easy to Hard	1013	<img src ='img/train/seborrheic-keratoses-5.jpg' class = 'block-center rotate90'>	Training1	8	0	Benign
Easy to Hard	1013	<img src ='img/train/melancocytic-nevi-13.jpg' class = 'block-center rotate90'>	Training1	9	1	Benign
Easy to Hard	1013	<img src ='img/train/superficial-spreading-38.jpg' class = 'block-center rotate180'>	Training1	10	1	Melanoma
Easy to Hard	1013	<img src ='img/train/acral-lentiginous-14.jpg' class = 'block-center rotate0'>	Training1	11	0	Melanoma
Easy to Hard	1013	<img src ='img/train/seborrheic-keratoses-9.jpg' class = 'block-center rotate180'>	Training1	12	0	Benign
Easy to Hard	1013	<img src ='img/train/seborrheic-keratoses-10.jpg' class = 'block-center rotate90'>	Training1	13	1	Benign
Easy to Hard	1013	<img src ='img/train/acral-lentiginous-5.jpg' class = 'block-center rotate90'>	Training1	14	1	Melanoma
Easy to Hard	1013	<img src ='img/train/blue-nevus-11.jpg' class = 'block-center rotate0'>	Training1	15	1	Benign
Easy to Hard	1013	<img src ='img/train/nodular-8.jpg' class = 'block-center rotate270'>	Training1	16	0	Melanoma
Easy to Hard	1013	<img src ='img/train/blue-nevus-17.jpg' class = 'block-center rotate0'>	Training1	17	1	Benign
Easy to Hard	1013	<img src ='img/train/melancocytic-nevi-20.jpg' class = 'block-center rotate180'>	Training1	18	1	Benign
Easy to Hard	1013	<img src ='img/train/melancocytic-nevi-12.jpg' class = 'block-center rotate270'>	Training1	19	1	Benign
Easy to Hard	1013	<img src ='img/train/seborrheic-keratoses-30.jpg' class = 'block-center rotate0'>	Training1	20	0	Benign
Easy to Hard	1013	<img src ='img/train/melancocytic-nevi-9.jpg' class = 'block-center rotate180'>	Training1	21	0	Benign
Easy to Hard	1013	<img src ='img/train/seborrheic-keratoses-2.jpg' class = 'block-center rotate0'>	Training1	22	0	Benign
Easy to Hard	1013	<img src ='img/train/superficial-spreading-26.jpg' class = 'block-center rotate270'>	Training1	23	1	Melanoma
Easy to Hard	1013	<img src ='img/train/lentigo-magligna-41.jpg' class = 'block-center rotate180'>	Training1	24	0	Melanoma
Easy to Hard	1013	<img src ='img/train/superficial-spreading-19.jpg' class = 'block-center rotate180'>	Training1	25	1	Melanoma
Easy to Hard	1013	<img src ='img/train/lentigo-magligna-10.jpg' class = 'block-center rotate270'>	Training1	26	1	Melanoma
Easy to Hard	1013	<img src ='img/train/acral-lentiginous-20.jpg' class = 'block-center rotate180'>	Training1	27	0	Melanoma
Easy to Hard	1013	<img src ='img/train/superficial-spreading-1.jpg' class = 'block-center rotate0'>	Training1	28	1	Melanoma
Easy to Hard	1013	<img src ='img/train/acral-lentiginous-37.jpg' class = 'block-center rotate270'>	Training1	29	1	Melanoma
Easy to Hard	1013	<img src ='img/train/melancocytic-nevi-3.jpg' class = 'block-center rotate180'>	Training1	30	1	Benign
Easy to Hard	1013	<img src ='img/train/acral-lentiginous-4.jpg' class = 'block-center rotate270'>	Training1	31	1	Melanoma
Easy to Hard	1013	<img src ='img/train/seborrheic-keratoses-18.jpg' class = 'block-center rotate180'>	Training1	32	1	Benign
Easy to Hard	1013	<img src ='img/train/seborrheic-keratoses-18.jpg' class = 'block-center rotate180'>	Training2	1	1	Benign
Easy to Hard	1013	<img src ='img/train/blue-nevus-17.jpg' class = 'block-center rotate90'>	Training2	2	1	Benign
Easy to Hard	1013	<img src ='img/train/superficial-spreading-26.jpg' class = 'block-center rotate90'>	Training2	3	1	Melanoma
Easy to Hard	1013	<img src ='img/train/seborrheic-keratoses-30.jpg' class = 'block-center rotate0'>	Training2	4	1	Benign
Easy to Hard	1013	<img src ='img/train/lentigo-magligna-41.jpg' class = 'block-center rotate180'>	Training2	5	1	Melanoma
Easy to Hard	1013	<img src ='img/train/nodular-8.jpg' class = 'block-center rotate180'>	Training2	6	1	Melanoma
Easy to Hard	1013	<img src ='img/train/acral-lentiginous-4.jpg' class = 'block-center rotate180'>	Training2	7	1	Melanoma
Easy to Hard	1013	<img src ='img/train/seborrheic-keratoses-9.jpg' class = 'block-center rotate180'>	Training2	8	0	Benign
Easy to Hard	1013	<img src ='img/train/blue-nevus-30.jpg' class = 'block-center rotate0'>	Training2	9	1	Benign
Easy to Hard	1013	<img src ='img/train/seborrheic-keratoses-10.jpg' class = 'block-center rotate0'>	Training2	10	1	Benign
Easy to Hard	1013	<img src ='img/train/superficial-spreading-38.jpg' class = 'block-center rotate90'>	Training2	11	1	Melanoma
Easy to Hard	1013	<img src ='img/train/lentigo-magligna-33.jpg' class = 'block-center rotate90'>	Training2	12	1	Melanoma
Easy to Hard	1013	<img src ='img/train/melancocytic-nevi-20.jpg' class = 'block-center rotate0'>	Training2	13	1	Benign
Easy to Hard	1013	<img src ='img/train/melancocytic-nevi-3.jpg' class = 'block-center rotate90'>	Training2	14	1	Benign
Easy to Hard	1013	<img src ='img/train/seborrheic-keratoses-33.jpg' class = 'block-center rotate270'>	Training2	15	0	Benign
Easy to Hard	1013	<img src ='img/train/melancocytic-nevi-13.jpg' class = 'block-center rotate0'>	Training2	16	1	Benign
Easy to Hard	1013	<img src ='img/train/lentigo-magligna-10.jpg' class = 'block-center rotate90'>	Training2	17	1	Melanoma
Easy to Hard	1013	<img src ='img/train/superficial-spreading-19.jpg' class = 'block-center rotate270'>	Training2	18	1	Melanoma
Easy to Hard	1013	<img src ='img/train/lentigo-magligna-1.jpg' class = 'block-center rotate90'>	Training2	19	1	Melanoma
Easy to Hard	1013	<img src ='img/train/superficial-spreading-1.jpg' class = 'block-center rotate0'>	Training2	20	1	Melanoma
Easy to Hard	1013	<img src ='img/train/acral-lentiginous-14.jpg' class = 'block-center rotate270'>	Training2	21	1	Melanoma
Easy to Hard	1013	<img src ='img/train/acral-lentiginous-37.jpg' class = 'block-center rotate0'>	Training2	22	1	Melanoma
Easy to Hard	1013	<img src ='img/train/blue-nevus-11.jpg' class = 'block-center rotate270'>	Training2	23	1	Benign
Easy to Hard	1013	<img src ='img/train/seborrheic-keratoses-5.jpg' class = 'block-center rotate180'>	Training2	24	0	Benign
Easy to Hard	1013	<img src ='img/train/melancocytic-nevi-9.jpg' class = 'block-center rotate0'>	Training2	25	0	Benign
Easy to Hard	1013	<img src ='img/train/acral-lentiginous-20.jpg' class = 'block-center rotate0'>	Training2	26	1	Melanoma
Easy to Hard	1013	<img src ='img/train/superficial-spreading-16.jpg' class = 'block-center rotate270'>	Training2	27	1	Melanoma
Easy to Hard	1013	<img src ='img/train/acral-lentiginous-5.jpg' class = 'block-center rotate90'>	Training2	28	1	Melanoma
Easy to Hard	1013	<img src ='img/train/nodular-11.jpg' class = 'block-center rotate270'>	Training2	29	1	Melanoma
Easy to Hard	1013	<img src ='img/train/seborrheic-keratoses-2.jpg' class = 'block-center rotate180'>	Training2	30	1	Benign
Easy to Hard	1013	<img src ='img/train/melancocytic-nevi-12.jpg' class = 'block-center rotate90'>	Training2	31	1	Benign
Easy to Hard	1013	<img src ='img/train/melancocytic-nevi-4.jpg' class = 'block-center rotate90'>	Training2	32	1	Benign
Easy to Hard	1013	<img src ='img/train/lentigo-magligna-1.jpg' class = 'block-center rotate270'>	Training3	1	1	Melanoma
Easy to Hard	1013	<img src ='img/train/blue-nevus-17.jpg' class = 'block-center rotate180'>	Training3	2	1	Benign
Easy to Hard	1013	<img src ='img/train/acral-lentiginous-14.jpg' class = 'block-center rotate180'>	Training3	3	1	Melanoma
Easy to Hard	1013	<img src ='img/train/nodular-8.jpg' class = 'block-center rotate180'>	Training3	4	1	Melanoma
Easy to Hard	1013	<img src ='img/train/superficial-spreading-1.jpg' class = 'block-center rotate0'>	Training3	5	1	Melanoma
Easy to Hard	1013	<img src ='img/train/seborrheic-keratoses-33.jpg' class = 'block-center rotate90'>	Training3	6	1	Benign
Easy to Hard	1013	<img src ='img/train/seborrheic-keratoses-10.jpg' class = 'block-center rotate270'>	Training3	7	1	Benign
Easy to Hard	1013	<img src ='img/train/acral-lentiginous-4.jpg' class = 'block-center rotate180'>	Training3	8	1	Melanoma
Easy to Hard	1013	<img src ='img/train/acral-lentiginous-37.jpg' class = 'block-center rotate180'>	Training3	9	1	Melanoma
Easy to Hard	1013	<img src ='img/train/superficial-spreading-38.jpg' class = 'block-center rotate0'>	Training3	10	1	Melanoma
Easy to Hard	1013	<img src ='img/train/lentigo-magligna-10.jpg' class = 'block-center rotate0'>	Training3	11	1	Melanoma
Easy to Hard	1013	<img src ='img/train/seborrheic-keratoses-18.jpg' class = 'block-center rotate90'>	Training3	12	1	Benign
Easy to Hard	1013	<img src ='img/train/superficial-spreading-16.jpg' class = 'block-center rotate270'>	Training3	13	1	Melanoma
Easy to Hard	1013	<img src ='img/train/melancocytic-nevi-4.jpg' class = 'block-center rotate0'>	Training3	14	1	Benign
Easy to Hard	1013	<img src ='img/train/melancocytic-nevi-9.jpg' class = 'block-center rotate180'>	Training3	15	1	Benign
Easy to Hard	1013	<img src ='img/train/superficial-spreading-19.jpg' class = 'block-center rotate270'>	Training3	16	1	Melanoma
Easy to Hard	1013	<img src ='img/train/blue-nevus-11.jpg' class = 'block-center rotate270'>	Training3	17	1	Benign
Easy to Hard	1013	<img src ='img/train/lentigo-magligna-41.jpg' class = 'block-center rotate180'>	Training3	18	1	Melanoma
Easy to Hard	1013	<img src ='img/train/melancocytic-nevi-13.jpg' class = 'block-center rotate90'>	Training3	19	1	Benign
Easy to Hard	1013	<img src ='img/train/seborrheic-keratoses-2.jpg' class = 'block-center rotate0'>	Training3	20	1	Benign
Easy to Hard	1013	<img src ='img/train/seborrheic-keratoses-30.jpg' class = 'block-center rotate180'>	Training3	21	1	Benign
Easy to Hard	1013	<img src ='img/train/nodular-11.jpg' class = 'block-center rotate270'>	Training3	22	1	Melanoma
Easy to Hard	1013	<img src ='img/train/melancocytic-nevi-20.jpg' class = 'block-center rotate270'>	Training3	23	0	Benign
Easy to Hard	1013	<img src ='img/train/blue-nevus-30.jpg' class = 'block-center rotate180'>	Training3	24	1	Benign
Easy to Hard	1013	<img src ='img/train/melancocytic-nevi-12.jpg' class = 'block-center rotate90'>	Training3	25	1	Benign
Easy to Hard	1013	<img src ='img/train/seborrheic-keratoses-9.jpg' class = 'block-center rotate90'>	Training3	26	1	Benign
Easy to Hard	1013	<img src ='img/train/acral-lentiginous-5.jpg' class = 'block-center rotate270'>	Training3	27	1	Melanoma
Easy to Hard	1013	<img src ='img/train/acral-lentiginous-20.jpg' class = 'block-center rotate0'>	Training3	28	1	Melanoma
Easy to Hard	1013	<img src ='img/train/seborrheic-keratoses-5.jpg' class = 'block-center rotate180'>	Training3	29	1	Benign
Easy to Hard	1013	<img src ='img/train/melancocytic-nevi-3.jpg' class = 'block-center rotate270'>	Training3	30	0	Benign
Easy to Hard	1013	<img src ='img/train/lentigo-magligna-33.jpg' class = 'block-center rotate270'>	Training3	31	1	Melanoma
Easy to Hard	1013	<img src ='img/train/superficial-spreading-26.jpg' class = 'block-center rotate270'>	Training3	32	1	Melanoma
Easy to Hard	1013	<img src ='img/train/acral-lentiginous-37.jpg' class = 'block-center rotate0'>	Training4	1	1	Melanoma
Easy to Hard	1013	<img src ='img/train/acral-lentiginous-20.jpg' class = 'block-center rotate90'>	Training4	2	1	Melanoma
Easy to Hard	1013	<img src ='img/train/blue-nevus-17.jpg' class = 'block-center rotate270'>	Training4	3	1	Benign
Easy to Hard	1013	<img src ='img/train/seborrheic-keratoses-5.jpg' class = 'block-center rotate90'>	Training4	4	1	Benign
Easy to Hard	1013	<img src ='img/train/melancocytic-nevi-20.jpg' class = 'block-center rotate270'>	Training4	5	1	Benign
Easy to Hard	1013	<img src ='img/train/acral-lentiginous-14.jpg' class = 'block-center rotate90'>	Training4	6	1	Melanoma
Easy to Hard	1013	<img src ='img/train/blue-nevus-30.jpg' class = 'block-center rotate180'>	Training4	7	1	Benign
Easy to Hard	1013	<img src ='img/train/nodular-8.jpg' class = 'block-center rotate0'>	Training4	8	1	Melanoma
Easy to Hard	1013	<img src ='img/train/melancocytic-nevi-12.jpg' class = 'block-center rotate180'>	Training4	9	1	Benign
Easy to Hard	1013	<img src ='img/train/nodular-11.jpg' class = 'block-center rotate0'>	Training4	10	1	Melanoma
Easy to Hard	1013	<img src ='img/train/lentigo-magligna-41.jpg' class = 'block-center rotate270'>	Training4	11	1	Melanoma
Easy to Hard	1013	<img src ='img/train/superficial-spreading-16.jpg' class = 'block-center rotate180'>	Training4	12	1	Melanoma
Easy to Hard	1013	<img src ='img/train/seborrheic-keratoses-30.jpg' class = 'block-center rotate180'>	Training4	13	1	Benign
Easy to Hard	1013	<img src ='img/train/seborrheic-keratoses-10.jpg' class = 'block-center rotate0'>	Training4	14	1	Benign
Easy to Hard	1013	<img src ='img/train/superficial-spreading-19.jpg' class = 'block-center rotate180'>	Training4	15	1	Melanoma
Easy to Hard	1013	<img src ='img/train/seborrheic-keratoses-2.jpg' class = 'block-center rotate90'>	Training4	16	1	Benign
Easy to Hard	1013	<img src ='img/train/seborrheic-keratoses-33.jpg' class = 'block-center rotate0'>	Training4	17	1	Benign
Easy to Hard	1013	<img src ='img/train/acral-lentiginous-4.jpg' class = 'block-center rotate90'>	Training4	18	1	Melanoma
Easy to Hard	1013	<img src ='img/train/acral-lentiginous-5.jpg' class = 'block-center rotate180'>	Training4	19	1	Melanoma
Easy to Hard	1013	<img src ='img/train/melancocytic-nevi-13.jpg' class = 'block-center rotate0'>	Training4	20	1	Benign
Easy to Hard	1013	<img src ='img/train/lentigo-magligna-10.jpg' class = 'block-center rotate270'>	Training4	21	1	Melanoma
Easy to Hard	1013	<img src ='img/train/seborrheic-keratoses-9.jpg' class = 'block-center rotate270'>	Training4	22	1	Benign
Easy to Hard	1013	<img src ='img/train/lentigo-magligna-1.jpg' class = 'block-center rotate270'>	Training4	23	1	Melanoma
Easy to Hard	1013	<img src ='img/train/melancocytic-nevi-9.jpg' class = 'block-center rotate270'>	Training4	24	1	Benign
Easy to Hard	1013	<img src ='img/train/superficial-spreading-38.jpg' class = 'block-center rotate90'>	Training4	25	1	Melanoma
Easy to Hard	1013	<img src ='img/train/lentigo-magligna-33.jpg' class = 'block-center rotate0'>	Training4	26	1	Melanoma
Easy to Hard	1013	<img src ='img/train/seborrheic-keratoses-18.jpg' class = 'block-center rotate180'>	Training4	27	1	Benign
Easy to Hard	1013	<img src ='img/train/superficial-spreading-1.jpg' class = 'block-center rotate0'>	Training4	28	1	Melanoma
Easy to Hard	1013	<img src ='img/train/melancocytic-nevi-3.jpg' class = 'block-center rotate90'>	Training4	29	1	Benign
Easy to Hard	1013	<img src ='img/train/superficial-spreading-26.jpg' class = 'block-center rotate0'>	Training4	30	1	Melanoma
Easy to Hard	1013	<img src ='img/train/blue-nevus-11.jpg' class = 'block-center rotate270'>	Training4	31	1	Benign
Easy to Hard	1013	<img src ='img/train/melancocytic-nevi-4.jpg' class = 'block-center rotate180'>	Training4	32	1	Benign
Easy to Hard	1013	<img src ='img/train/superficial-spreading-9.png' class = 'block-center rotate0'>	Training5	1	1	Melanoma
Easy to Hard	1013	<img src ='img/train/acral-lentiginous-16.jpg' class = 'block-center rotate180'>	Training5	2	1	Melanoma
Easy to Hard	1013	<img src ='img/train/superficial-spreading-2.jpg' class = 'block-center rotate0'>	Training5	3	1	Melanoma
Easy to Hard	1013	<img src ='img/train/lentigo-magligna-14.jpg' class = 'block-center rotate0'>	Training5	4	1	Melanoma
Easy to Hard	1013	<img src ='img/train/lentigo-33.jpg' class = 'block-center rotate270'>	Training5	5	1	Benign
Easy to Hard	1013	<img src ='img/train/blue-nevus-29.jpg' class = 'block-center rotate270'>	Training5	6	1	Benign
Easy to Hard	1013	<img src ='img/train/melancocytic-nevi-30.jpg' class = 'block-center rotate0'>	Training5	7	1	Benign
Easy to Hard	1013	<img src ='img/train/blue-nevus-21.jpg' class = 'block-center rotate0'>	Training5	8	1	Benign
Easy to Hard	1013	<img src ='img/train/lentigo-27.jpg' class = 'block-center rotate180'>	Training5	9	1	Benign
Easy to Hard	1013	<img src ='img/train/nodular-27.jpg' class = 'block-center rotate0'>	Training5	10	0	Melanoma
Easy to Hard	1013	<img src ='img/train/lentigo-6.jpg' class = 'block-center rotate0'>	Training5	11	1	Benign
Easy to Hard	1013	<img src ='img/train/acral-lentiginous-28.jpg' class = 'block-center rotate270'>	Training5	12	1	Melanoma
Easy to Hard	1013	<img src ='img/train/lentigo-28.jpg' class = 'block-center rotate0'>	Training5	13	1	Benign
Easy to Hard	1013	<img src ='img/train/superficial-spreading-7.jpg' class = 'block-center rotate180'>	Training5	14	1	Melanoma
Easy to Hard	1013	<img src ='img/train/lentigo-magligna-36.jpg' class = 'block-center rotate270'>	Training5	15	1	Melanoma
Easy to Hard	1013	<img src ='img/train/melancocytic-nevi-1.jpg' class = 'block-center rotate90'>	Training5	16	0	Benign
Easy to Hard	1013	<img src ='img/train/melancocytic-nevi-37.jpg' class = 'block-center rotate270'>	Training5	17	1	Benign
Easy to Hard	1013	<img src ='img/train/lentigo-magligna-15.jpg' class = 'block-center rotate180'>	Training5	18	1	Melanoma
Easy to Hard	1013	<img src ='img/train/melancocytic-nevi-17.jpg' class = 'block-center rotate90'>	Training5	19	1	Benign
Easy to Hard	1013	<img src ='img/train/acral-lentiginous-24.jpg' class = 'block-center rotate180'>	Training5	20	1	Melanoma
Easy to Hard	1013	<img src ='img/train/lentigo-magligna-6.jpg' class = 'block-center rotate180'>	Training5	21	1	Melanoma
Easy to Hard	1013	<img src ='img/train/blue-nevus-7.jpg' class = 'block-center rotate270'>	Training5	22	1	Benign
Easy to Hard	1013	<img src ='img/train/lentigo-13.jpg' class = 'block-center rotate0'>	Training5	23	1	Benign
Easy to Hard	1013	<img src ='img/train/lentigo-23.jpg' class = 'block-center rotate90'>	Training5	24	1	Benign
Easy to Hard	1013	<img src ='img/train/superficial-spreading-40.jpg' class = 'block-center rotate0'>	Training5	25	1	Melanoma
Easy to Hard	1013	<img src ='img/train/nodular-35.jpg' class = 'block-center rotate90'>	Training5	26	0	Melanoma
Easy to Hard	1013	<img src ='img/train/seborrheic-keratoses-13.jpg' class = 'block-center rotate180'>	Training5	27	0	Benign
Easy to Hard	1013	<img src ='img/train/seborrheic-keratoses-1.jpg' class = 'block-center rotate180'>	Training5	28	0	Benign
Easy to Hard	1013	<img src ='img/train/superficial-spreading-8.jpg' class = 'block-center rotate0'>	Training5	29	1	Melanoma
Easy to Hard	1013	<img src ='img/train/acral-lentiginous-22.jpg' class = 'block-center rotate180'>	Training5	30	0	Melanoma
Easy to Hard	1013	<img src ='img/train/nodular-1.jpg' class = 'block-center rotate90'>	Training5	31	0	Melanoma
Easy to Hard	1013	<img src ='img/train/blue-nevus-2.jpg' class = 'block-center rotate180'>	Training5	32	1	Benign
Easy to Hard	1013	<img src ='img/train/lentigo-6.jpg' class = 'block-center rotate0'>	Training6	1	1	Benign
Easy to Hard	1013	<img src ='img/train/acral-lentiginous-28.jpg' class = 'block-center rotate90'>	Training6	2	1	Melanoma
Easy to Hard	1013	<img src ='img/train/nodular-35.jpg' class = 'block-center rotate90'>	Training6	3	0	Melanoma
Easy to Hard	1013	<img src ='img/train/superficial-spreading-7.jpg' class = 'block-center rotate0'>	Training6	4	1	Melanoma
Easy to Hard	1013	<img src ='img/train/melancocytic-nevi-1.jpg' class = 'block-center rotate0'>	Training6	5	1	Benign
Easy to Hard	1013	<img src ='img/train/acral-lentiginous-16.jpg' class = 'block-center rotate90'>	Training6	6	1	Melanoma
Easy to Hard	1013	<img src ='img/train/lentigo-magligna-15.jpg' class = 'block-center rotate180'>	Training6	7	1	Melanoma
Easy to Hard	1013	<img src ='img/train/lentigo-33.jpg' class = 'block-center rotate270'>	Training6	8	1	Benign
Easy to Hard	1013	<img src ='img/train/acral-lentiginous-24.jpg' class = 'block-center rotate180'>	Training6	9	1	Melanoma
Easy to Hard	1013	<img src ='img/train/lentigo-magligna-36.jpg' class = 'block-center rotate0'>	Training6	10	1	Melanoma
Easy to Hard	1013	<img src ='img/train/seborrheic-keratoses-13.jpg' class = 'block-center rotate90'>	Training6	11	0	Benign
Easy to Hard	1013	<img src ='img/train/lentigo-magligna-6.jpg' class = 'block-center rotate0'>	Training6	12	1	Melanoma
Easy to Hard	1013	<img src ='img/train/superficial-spreading-2.jpg' class = 'block-center rotate180'>	Training6	13	1	Melanoma
Easy to Hard	1013	<img src ='img/train/lentigo-13.jpg' class = 'block-center rotate90'>	Training6	14	1	Benign
Easy to Hard	1013	<img src ='img/train/melancocytic-nevi-17.jpg' class = 'block-center rotate180'>	Training6	15	0	Benign
Easy to Hard	1013	<img src ='img/train/melancocytic-nevi-30.jpg' class = 'block-center rotate270'>	Training6	16	1	Benign
Easy to Hard	1013	<img src ='img/train/superficial-spreading-9.png' class = 'block-center rotate90'>	Training6	17	1	Melanoma
Easy to Hard	1013	<img src ='img/train/melancocytic-nevi-37.jpg' class = 'block-center rotate90'>	Training6	18	1	Benign
Easy to Hard	1013	<img src ='img/train/seborrheic-keratoses-1.jpg' class = 'block-center rotate270'>	Training6	19	0	Benign
Easy to Hard	1013	<img src ='img/train/blue-nevus-21.jpg' class = 'block-center rotate90'>	Training6	20	1	Benign
Easy to Hard	1013	<img src ='img/train/nodular-27.jpg' class = 'block-center rotate90'>	Training6	21	1	Melanoma
Easy to Hard	1013	<img src ='img/train/lentigo-27.jpg' class = 'block-center rotate0'>	Training6	22	1	Benign
Easy to Hard	1013	<img src ='img/train/blue-nevus-2.jpg' class = 'block-center rotate90'>	Training6	23	1	Benign
Easy to Hard	1013	<img src ='img/train/superficial-spreading-40.jpg' class = 'block-center rotate90'>	Training6	24	1	Melanoma
Easy to Hard	1013	<img src ='img/train/lentigo-magligna-14.jpg' class = 'block-center rotate180'>	Training6	25	0	Melanoma
Easy to Hard	1013	<img src ='img/train/blue-nevus-7.jpg' class = 'block-center rotate270'>	Training6	26	1	Benign
Easy to Hard	1013	<img src ='img/train/blue-nevus-29.jpg' class = 'block-center rotate0'>	Training6	27	1	Benign
Easy to Hard	1013	<img src ='img/train/lentigo-23.jpg' class = 'block-center rotate270'>	Training6	28	1	Benign
Easy to Hard	1013	<img src ='img/train/acral-lentiginous-22.jpg' class = 'block-center rotate180'>	Training6	29	1	Melanoma
Easy to Hard	1013	<img src ='img/train/superficial-spreading-8.jpg' class = 'block-center rotate270'>	Training6	30	1	Melanoma
Easy to Hard	1013	<img src ='img/train/nodular-1.jpg' class = 'block-center rotate270'>	Training6	31	1	Melanoma
Easy to Hard	1013	<img src ='img/train/lentigo-28.jpg' class = 'block-center rotate180'>	Training6	32	1	Benign
Easy to Hard	1013	<img src ='img/train/superficial-spreading-8.jpg' class = 'block-center rotate0'>	Training7	1	1	Melanoma
Easy to Hard	1013	<img src ='img/train/superficial-spreading-2.jpg' class = 'block-center rotate90'>	Training7	2	1	Melanoma
Easy to Hard	1013	<img src ='img/train/lentigo-13.jpg' class = 'block-center rotate180'>	Training7	3	1	Benign
Easy to Hard	1013	<img src ='img/train/lentigo-33.jpg' class = 'block-center rotate90'>	Training7	4	1	Benign
Easy to Hard	1013	<img src ='img/train/blue-nevus-29.jpg' class = 'block-center rotate270'>	Training7	5	1	Benign
Easy to Hard	1013	<img src ='img/train/melancocytic-nevi-37.jpg' class = 'block-center rotate270'>	Training7	6	1	Benign
Easy to Hard	1013	<img src ='img/train/superficial-spreading-9.png' class = 'block-center rotate90'>	Training7	7	1	Melanoma
Easy to Hard	1013	<img src ='img/train/seborrheic-keratoses-1.jpg' class = 'block-center rotate270'>	Training7	8	0	Benign
Easy to Hard	1013	<img src ='img/train/nodular-27.jpg' class = 'block-center rotate0'>	Training7	9	1	Melanoma
Easy to Hard	1013	<img src ='img/train/blue-nevus-2.jpg' class = 'block-center rotate0'>	Training7	10	1	Benign
Easy to Hard	1013	<img src ='img/train/lentigo-23.jpg' class = 'block-center rotate180'>	Training7	11	1	Benign
Easy to Hard	1013	<img src ='img/train/melancocytic-nevi-17.jpg' class = 'block-center rotate180'>	Training7	12	0	Benign
Easy to Hard	1013	<img src ='img/train/acral-lentiginous-28.jpg' class = 'block-center rotate0'>	Training7	13	1	Melanoma
Easy to Hard	1013	<img src ='img/train/acral-lentiginous-24.jpg' class = 'block-center rotate0'>	Training7	14	1	Melanoma
Easy to Hard	1013	<img src ='img/train/lentigo-6.jpg' class = 'block-center rotate180'>	Training7	15	1	Benign
Easy to Hard	1013	<img src ='img/train/blue-nevus-7.jpg' class = 'block-center rotate0'>	Training7	16	1	Benign
Easy to Hard	1013	<img src ='img/train/melancocytic-nevi-30.jpg' class = 'block-center rotate90'>	Training7	17	1	Benign
Easy to Hard	1013	<img src ='img/train/superficial-spreading-7.jpg' class = 'block-center rotate90'>	Training7	18	1	Melanoma
Easy to Hard	1013	<img src ='img/train/acral-lentiginous-22.jpg' class = 'block-center rotate90'>	Training7	19	1	Melanoma
Easy to Hard	1013	<img src ='img/train/seborrheic-keratoses-13.jpg' class = 'block-center rotate0'>	Training7	20	1	Benign
Easy to Hard	1013	<img src ='img/train/superficial-spreading-40.jpg' class = 'block-center rotate180'>	Training7	21	1	Melanoma
Easy to Hard	1013	<img src ='img/train/blue-nevus-21.jpg' class = 'block-center rotate180'>	Training7	22	1	Benign
Easy to Hard	1013	<img src ='img/train/lentigo-magligna-14.jpg' class = 'block-center rotate270'>	Training7	23	1	Melanoma
Easy to Hard	1013	<img src ='img/train/lentigo-27.jpg' class = 'block-center rotate0'>	Training7	24	1	Benign
Easy to Hard	1013	<img src ='img/train/lentigo-magligna-15.jpg' class = 'block-center rotate90'>	Training7	25	1	Melanoma
Easy to Hard	1013	<img src ='img/train/lentigo-magligna-6.jpg' class = 'block-center rotate180'>	Training7	26	1	Melanoma
Easy to Hard	1013	<img src ='img/train/nodular-1.jpg' class = 'block-center rotate0'>	Training7	27	1	Melanoma
Easy to Hard	1013	<img src ='img/train/lentigo-28.jpg' class = 'block-center rotate0'>	Training7	28	1	Benign
Easy to Hard	1013	<img src ='img/train/lentigo-magligna-36.jpg' class = 'block-center rotate90'>	Training7	29	1	Melanoma
Easy to Hard	1013	<img src ='img/train/nodular-35.jpg' class = 'block-center rotate270'>	Training7	30	0	Melanoma
Easy to Hard	1013	<img src ='img/train/acral-lentiginous-16.jpg' class = 'block-center rotate180'>	Training7	31	1	Melanoma
Easy to Hard	1013	<img src ='img/train/melancocytic-nevi-1.jpg' class = 'block-center rotate270'>	Training7	32	1	Benign
Easy to Hard	1013	<img src ='img/train/acral-lentiginous-16.jpg' class = 'block-center rotate180'>	Training8	1	1	Melanoma
Easy to Hard	1013	<img src ='img/train/lentigo-magligna-6.jpg' class = 'block-center rotate0'>	Training8	2	1	Melanoma
Easy to Hard	1013	<img src ='img/train/blue-nevus-21.jpg' class = 'block-center rotate270'>	Training8	3	1	Benign
Easy to Hard	1013	<img src ='img/train/seborrheic-keratoses-1.jpg' class = 'block-center rotate270'>	Training8	4	0	Benign
Easy to Hard	1013	<img src ='img/train/lentigo-6.jpg' class = 'block-center rotate180'>	Training8	5	1	Benign
Easy to Hard	1013	<img src ='img/train/superficial-spreading-2.jpg' class = 'block-center rotate0'>	Training8	6	1	Melanoma
Easy to Hard	1013	<img src ='img/train/acral-lentiginous-28.jpg' class = 'block-center rotate180'>	Training8	7	1	Melanoma
Easy to Hard	1013	<img src ='img/train/melancocytic-nevi-30.jpg' class = 'block-center rotate0'>	Training8	8	1	Benign
Easy to Hard	1013	<img src ='img/train/lentigo-23.jpg' class = 'block-center rotate90'>	Training8	9	1	Benign
Easy to Hard	1013	<img src ='img/train/nodular-1.jpg' class = 'block-center rotate180'>	Training8	10	1	Melanoma
Easy to Hard	1013	<img src ='img/train/lentigo-28.jpg' class = 'block-center rotate270'>	Training8	11	1	Benign
Easy to Hard	1013	<img src ='img/train/superficial-spreading-7.jpg' class = 'block-center rotate90'>	Training8	12	1	Melanoma
Easy to Hard	1013	<img src ='img/train/melancocytic-nevi-1.jpg' class = 'block-center rotate90'>	Training8	13	1	Benign
Easy to Hard	1013	<img src ='img/train/lentigo-magligna-14.jpg' class = 'block-center rotate180'>	Training8	14	1	Melanoma
Easy to Hard	1013	<img src ='img/train/lentigo-13.jpg' class = 'block-center rotate180'>	Training8	15	1	Benign
Easy to Hard	1013	<img src ='img/train/superficial-spreading-8.jpg' class = 'block-center rotate180'>	Training8	16	1	Melanoma
Easy to Hard	1013	<img src ='img/train/superficial-spreading-40.jpg' class = 'block-center rotate180'>	Training8	17	1	Melanoma
Easy to Hard	1013	<img src ='img/train/acral-lentiginous-24.jpg' class = 'block-center rotate90'>	Training8	18	1	Melanoma
Easy to Hard	1013	<img src ='img/train/blue-nevus-2.jpg' class = 'block-center rotate180'>	Training8	19	1	Benign
Easy to Hard	1013	<img src ='img/train/nodular-35.jpg' class = 'block-center rotate270'>	Training8	20	0	Melanoma
Easy to Hard	1013	<img src ='img/train/melancocytic-nevi-37.jpg' class = 'block-center rotate90'>	Training8	21	1	Benign
Easy to Hard	1013	<img src ='img/train/lentigo-33.jpg' class = 'block-center rotate270'>	Training8	22	1	Benign
Easy to Hard	1013	<img src ='img/train/lentigo-27.jpg' class = 'block-center rotate90'>	Training8	23	1	Benign
Easy to Hard	1013	<img src ='img/train/seborrheic-keratoses-13.jpg' class = 'block-center rotate0'>	Training8	24	1	Benign
Easy to Hard	1013	<img src ='img/train/lentigo-magligna-15.jpg' class = 'block-center rotate90'>	Training8	25	1	Melanoma
Easy to Hard	1013	<img src ='img/train/blue-nevus-29.jpg' class = 'block-center rotate270'>	Training8	26	1	Benign
Easy to Hard	1013	<img src ='img/train/melancocytic-nevi-17.jpg' class = 'block-center rotate0'>	Training8	27	0	Benign
Easy to Hard	1013	<img src ='img/train/nodular-27.jpg' class = 'block-center rotate180'>	Training8	28	1	Melanoma
Easy to Hard	1013	<img src ='img/train/blue-nevus-7.jpg' class = 'block-center rotate180'>	Training8	29	0	Benign
Easy to Hard	1013	<img src ='img/train/acral-lentiginous-22.jpg' class = 'block-center rotate270'>	Training8	30	1	Melanoma
Easy to Hard	1013	<img src ='img/train/superficial-spreading-9.png' class = 'block-center rotate0'>	Training8	31	1	Melanoma
Easy to Hard	1013	<img src ='img/train/lentigo-magligna-36.jpg' class = 'block-center rotate270'>	Training8	32	1	Melanoma
Easy to Hard	1013	<img src ='img/train/seborrheic-keratoses-28.jpg' class = 'block-center rotate180'>	Training9	1	0	Benign
Easy to Hard	1013	<img src ='img/train/nodular-21.jpg' class = 'block-center rotate0'>	Training9	2	1	Melanoma
Easy to Hard	1013	<img src ='img/train/lentigo-4.jpg' class = 'block-center rotate180'>	Training9	3	1	Benign
Easy to Hard	1013	<img src ='img/train/nodular-5.jpg' class = 'block-center rotate0'>	Training9	4	0	Melanoma
Easy to Hard	1013	<img src ='img/train/lentigo-magligna-32.jpg' class = 'block-center rotate180'>	Training9	5	1	Melanoma
Easy to Hard	1013	<img src ='img/train/acral-lentiginous-29.jpg' class = 'block-center rotate90'>	Training9	6	1	Melanoma
Easy to Hard	1013	<img src ='img/train/lentigo-31.jpg' class = 'block-center rotate90'>	Training9	7	0	Benign
Easy to Hard	1013	<img src ='img/train/lentigo-magligna-37.jpg' class = 'block-center rotate0'>	Training9	8	0	Melanoma
Easy to Hard	1013	<img src ='img/train/lentigo-12.jpg' class = 'block-center rotate90'>	Training9	9	0	Benign
Easy to Hard	1013	<img src ='img/train/blue-nevus-32.jpg' class = 'block-center rotate0'>	Training9	10	0	Benign
Easy to Hard	1013	<img src ='img/train/lentigo-magligna-7.jpg' class = 'block-center rotate0'>	Training9	11	0	Melanoma
Easy to Hard	1013	<img src ='img/train/seborrheic-keratoses-32.png' class = 'block-center rotate90'>	Training9	12	0	Benign
Easy to Hard	1013	<img src ='img/train/nodular-16.jpg' class = 'block-center rotate0'>	Training9	13	0	Melanoma
Easy to Hard	1013	<img src ='img/train/blue-nevus-33.jpg' class = 'block-center rotate0'>	Training9	14	1	Benign
Easy to Hard	1013	<img src ='img/train/blue-nevus-36.jpg' class = 'block-center rotate180'>	Training9	15	0	Benign
Easy to Hard	1013	<img src ='img/train/nodular-37.jpg' class = 'block-center rotate180'>	Training9	16	1	Melanoma
Easy to Hard	1013	<img src ='img/train/lentigo-magligna-40.jpg' class = 'block-center rotate180'>	Training9	17	0	Melanoma
Easy to Hard	1013	<img src ='img/train/nodular-23.jpg' class = 'block-center rotate0'>	Training9	18	0	Melanoma
Easy to Hard	1013	<img src ='img/train/acral-lentiginous-3.jpg' class = 'block-center rotate0'>	Training9	19	1	Melanoma
Easy to Hard	1013	<img src ='img/train/acral-lentiginous-8.jpg' class = 'block-center rotate0'>	Training9	20	1	Melanoma
Easy to Hard	1013	<img src ='img/train/superficial-spreading-23.jpg' class = 'block-center rotate270'>	Training9	21	1	Melanoma
Easy to Hard	1013	<img src ='img/train/melancocytic-nevi-5.jpg' class = 'block-center rotate90'>	Training9	22	0	Benign
Easy to Hard	1013	<img src ='img/train/blue-nevus-8.jpg' class = 'block-center rotate270'>	Training9	23	1	Benign
Easy to Hard	1013	<img src ='img/train/blue-nevus-18.jpg' class = 'block-center rotate270'>	Training9	24	0	Benign
Easy to Hard	1013	<img src ='img/train/seborrheic-keratoses-37.jpg' class = 'block-center rotate180'>	Training9	25	0	Benign
Easy to Hard	1013	<img src ='img/train/nodular-41.jpg' class = 'block-center rotate180'>	Training9	26	1	Melanoma
Easy to Hard	1013	<img src ='img/train/lentigo-32.jpg' class = 'block-center rotate270'>	Training9	27	0	Benign
Easy to Hard	1013	<img src ='img/train/lentigo-14.jpg' class = 'block-center rotate90'>	Training9	28	0	Benign
Easy to Hard	1013	<img src ='img/train/superficial-spreading-14.jpg' class = 'block-center rotate0'>	Training9	29	1	Melanoma
Easy to Hard	1013	<img src ='img/train/melancocytic-nevi-38.jpg' class = 'block-center rotate0'>	Training9	30	0	Benign
Easy to Hard	1013	<img src ='img/train/lentigo-34.jpg' class = 'block-center rotate270'>	Training9	31	0	Benign
Easy to Hard	1013	<img src ='img/train/nodular-40.jpg' class = 'block-center rotate0'>	Training9	32	0	Melanoma
Easy to Hard	1013	<img src ='img/train/seborrheic-keratoses-37.jpg' class = 'block-center rotate0'>	Training10	1	0	Benign
Easy to Hard	1013	<img src ='img/train/lentigo-magligna-40.jpg' class = 'block-center rotate0'>	Training10	2	0	Melanoma
Easy to Hard	1013	<img src ='img/train/lentigo-magligna-7.jpg' class = 'block-center rotate270'>	Training10	3	0	Melanoma
Easy to Hard	1013	<img src ='img/train/melancocytic-nevi-38.jpg' class = 'block-center rotate90'>	Training10	4	1	Benign
Easy to Hard	1013	<img src ='img/train/nodular-41.jpg' class = 'block-center rotate270'>	Training10	5	1	Melanoma
Easy to Hard	1013	<img src ='img/train/superficial-spreading-14.jpg' class = 'block-center rotate270'>	Training10	6	1	Melanoma
Easy to Hard	1013	<img src ='img/train/seborrheic-keratoses-28.jpg' class = 'block-center rotate90'>	Training10	7	0	Benign
Easy to Hard	1013	<img src ='img/train/melancocytic-nevi-5.jpg' class = 'block-center rotate0'>	Training10	8	0	Benign
Easy to Hard	1013	<img src ='img/train/seborrheic-keratoses-32.png' class = 'block-center rotate180'>	Training10	9	0	Benign
Easy to Hard	1013	<img src ='img/train/acral-lentiginous-29.jpg' class = 'block-center rotate0'>	Training10	10	0	Melanoma
Easy to Hard	1013	<img src ='img/train/nodular-40.jpg' class = 'block-center rotate270'>	Training10	11	0	Melanoma
Easy to Hard	1013	<img src ='img/train/lentigo-31.jpg' class = 'block-center rotate90'>	Training10	12	0	Benign
Easy to Hard	1013	<img src ='img/train/lentigo-34.jpg' class = 'block-center rotate270'>	Training10	13	0	Benign
Easy to Hard	1013	<img src ='img/train/acral-lentiginous-3.jpg' class = 'block-center rotate270'>	Training10	14	1	Melanoma
Easy to Hard	1013	<img src ='img/train/nodular-5.jpg' class = 'block-center rotate270'>	Training10	15	0	Melanoma
Easy to Hard	1013	<img src ='img/train/lentigo-4.jpg' class = 'block-center rotate270'>	Training10	16	1	Benign
Easy to Hard	1013	<img src ='img/train/lentigo-14.jpg' class = 'block-center rotate0'>	Training10	17	0	Benign
Easy to Hard	1013	<img src ='img/train/nodular-23.jpg' class = 'block-center rotate180'>	Training10	18	0	Melanoma
Easy to Hard	1013	<img src ='img/train/blue-nevus-36.jpg' class = 'block-center rotate0'>	Training10	19	1	Benign
Easy to Hard	1013	<img src ='img/train/lentigo-32.jpg' class = 'block-center rotate90'>	Training10	20	0	Benign
Easy to Hard	1013	<img src ='img/train/lentigo-12.jpg' class = 'block-center rotate270'>	Training10	21	1	Benign
Easy to Hard	1013	<img src ='img/train/lentigo-magligna-37.jpg' class = 'block-center rotate180'>	Training10	22	0	Melanoma
Easy to Hard	1013	<img src ='img/train/blue-nevus-32.jpg' class = 'block-center rotate270'>	Training10	23	1	Benign
Easy to Hard	1013	<img src ='img/train/nodular-16.jpg' class = 'block-center rotate180'>	Training10	24	0	Melanoma
Easy to Hard	1013	<img src ='img/train/lentigo-magligna-32.jpg' class = 'block-center rotate0'>	Training10	25	0	Melanoma
Easy to Hard	1013	<img src ='img/train/blue-nevus-8.jpg' class = 'block-center rotate180'>	Training10	26	1	Benign
Easy to Hard	1013	<img src ='img/train/blue-nevus-33.jpg' class = 'block-center rotate90'>	Training10	27	1	Benign
Easy to Hard	1013	<img src ='img/train/acral-lentiginous-8.jpg' class = 'block-center rotate270'>	Training10	28	1	Melanoma
Easy to Hard	1013	<img src ='img/train/nodular-37.jpg' class = 'block-center rotate0'>	Training10	29	1	Melanoma
Easy to Hard	1013	<img src ='img/train/blue-nevus-18.jpg' class = 'block-center rotate270'>	Training10	30	1	Benign
Easy to Hard	1013	<img src ='img/train/superficial-spreading-23.jpg' class = 'block-center rotate0'>	Training10	31	0	Melanoma
Easy to Hard	1013	<img src ='img/train/nodular-21.jpg' class = 'block-center rotate180'>	Training10	32	1	Melanoma
Easy to Hard	1013	<img src ='img/train/seborrheic-keratoses-37.jpg' class = 'block-center rotate270'>	Training11	1	1	Benign
Easy to Hard	1013	<img src ='img/train/blue-nevus-36.jpg' class = 'block-center rotate0'>	Training11	2	1	Benign
Easy to Hard	1013	<img src ='img/train/seborrheic-keratoses-32.png' class = 'block-center rotate0'>	Training11	3	0	Benign
Easy to Hard	1013	<img src ='img/train/lentigo-12.jpg' class = 'block-center rotate90'>	Training11	4	0	Benign
Easy to Hard	1013	<img src ='img/train/nodular-21.jpg' class = 'block-center rotate270'>	Training11	5	1	Melanoma
Easy to Hard	1013	<img src ='img/train/blue-nevus-8.jpg' class = 'block-center rotate90'>	Training11	6	1	Benign
Easy to Hard	1013	<img src ='img/train/acral-lentiginous-8.jpg' class = 'block-center rotate0'>	Training11	7	1	Melanoma
Easy to Hard	1013	<img src ='img/train/lentigo-4.jpg' class = 'block-center rotate90'>	Training11	8	0	Benign
Easy to Hard	1013	<img src ='img/train/nodular-16.jpg' class = 'block-center rotate0'>	Training11	9	1	Melanoma
Easy to Hard	1013	<img src ='img/train/lentigo-magligna-7.jpg' class = 'block-center rotate0'>	Training11	10	0	Melanoma
Easy to Hard	1013	<img src ='img/train/lentigo-14.jpg' class = 'block-center rotate0'>	Training11	11	1	Benign
Easy to Hard	1013	<img src ='img/train/lentigo-magligna-32.jpg' class = 'block-center rotate180'>	Training11	12	1	Melanoma
Easy to Hard	1013	<img src ='img/train/seborrheic-keratoses-28.jpg' class = 'block-center rotate0'>	Training11	13	0	Benign
Easy to Hard	1013	<img src ='img/train/blue-nevus-18.jpg' class = 'block-center rotate0'>	Training11	14	1	Benign
Easy to Hard	1013	<img src ='img/train/nodular-5.jpg' class = 'block-center rotate180'>	Training11	15	1	Melanoma
Easy to Hard	1013	<img src ='img/train/lentigo-32.jpg' class = 'block-center rotate90'>	Training11	16	0	Benign
Easy to Hard	1013	<img src ='img/train/lentigo-magligna-40.jpg' class = 'block-center rotate180'>	Training11	17	0	Melanoma
Easy to Hard	1013	<img src ='img/train/blue-nevus-32.jpg' class = 'block-center rotate270'>	Training11	18	1	Benign
Easy to Hard	1013	<img src ='img/train/superficial-spreading-14.jpg' class = 'block-center rotate90'>	Training11	19	0	Melanoma
Easy to Hard	1013	<img src ='img/train/nodular-40.jpg' class = 'block-center rotate0'>	Training11	20	0	Melanoma
Easy to Hard	1013	<img src ='img/train/lentigo-34.jpg' class = 'block-center rotate180'>	Training11	21	1	Benign
Easy to Hard	1013	<img src ='img/train/lentigo-31.jpg' class = 'block-center rotate180'>	Training11	22	0	Benign
Easy to Hard	1013	<img src ='img/train/lentigo-magligna-37.jpg' class = 'block-center rotate0'>	Training11	23	0	Melanoma
Easy to Hard	1013	<img src ='img/train/melancocytic-nevi-5.jpg' class = 'block-center rotate180'>	Training11	24	0	Benign
Easy to Hard	1013	<img src ='img/train/nodular-23.jpg' class = 'block-center rotate0'>	Training11	25	0	Melanoma
Easy to Hard	1013	<img src ='img/train/superficial-spreading-23.jpg' class = 'block-center rotate0'>	Training11	26	1	Melanoma
Easy to Hard	1013	<img src ='img/train/nodular-41.jpg' class = 'block-center rotate270'>	Training11	27	1	Melanoma
Easy to Hard	1013	<img src ='img/train/blue-nevus-33.jpg' class = 'block-center rotate270'>	Training11	28	1	Benign
Easy to Hard	1013	<img src ='img/train/acral-lentiginous-29.jpg' class = 'block-center rotate90'>	Training11	29	0	Melanoma
Easy to Hard	1013	<img src ='img/train/nodular-37.jpg' class = 'block-center rotate270'>	Training11	30	1	Melanoma
Easy to Hard	1013	<img src ='img/train/acral-lentiginous-3.jpg' class = 'block-center rotate90'>	Training11	31	1	Melanoma
Easy to Hard	1013	<img src ='img/train/melancocytic-nevi-38.jpg' class = 'block-center rotate270'>	Training11	32	1	Benign
Easy to Hard	1013	<img src ='img/train/seborrheic-keratoses-37.jpg' class = 'block-center rotate90'>	Training12	1	1	Benign
Easy to Hard	1013	<img src ='img/train/lentigo-34.jpg' class = 'block-center rotate180'>	Training12	2	1	Benign
Easy to Hard	1013	<img src ='img/train/lentigo-magligna-37.jpg' class = 'block-center rotate180'>	Training12	3	0	Melanoma
Easy to Hard	1013	<img src ='img/train/melancocytic-nevi-5.jpg' class = 'block-center rotate270'>	Training12	4	1	Benign
Easy to Hard	1013	<img src ='img/train/nodular-41.jpg' class = 'block-center rotate0'>	Training12	5	1	Melanoma
Easy to Hard	1013	<img src ='img/train/blue-nevus-18.jpg' class = 'block-center rotate0'>	Training12	6	1	Benign
Easy to Hard	1013	<img src ='img/train/blue-nevus-36.jpg' class = 'block-center rotate270'>	Training12	7	1	Benign
Easy to Hard	1013	<img src ='img/train/nodular-16.jpg' class = 'block-center rotate270'>	Training12	8	1	Melanoma
Easy to Hard	1013	<img src ='img/train/blue-nevus-33.jpg' class = 'block-center rotate270'>	Training12	9	1	Benign
Easy to Hard	1013	<img src ='img/train/nodular-23.jpg' class = 'block-center rotate0'>	Training12	10	0	Melanoma
Easy to Hard	1013	<img src ='img/train/acral-lentiginous-29.jpg' class = 'block-center rotate90'>	Training12	11	1	Melanoma
Easy to Hard	1013	<img src ='img/train/lentigo-magligna-40.jpg' class = 'block-center rotate0'>	Training12	12	1	Melanoma
Easy to Hard	1013	<img src ='img/train/nodular-37.jpg' class = 'block-center rotate90'>	Training12	13	1	Melanoma
Easy to Hard	1013	<img src ='img/train/lentigo-31.jpg' class = 'block-center rotate180'>	Training12	14	1	Benign
Easy to Hard	1013	<img src ='img/train/seborrheic-keratoses-32.png' class = 'block-center rotate0'>	Training12	15	0	Benign
Easy to Hard	1013	<img src ='img/train/melancocytic-nevi-38.jpg' class = 'block-center rotate90'>	Training12	16	0	Benign
Easy to Hard	1013	<img src ='img/train/seborrheic-keratoses-28.jpg' class = 'block-center rotate180'>	Training12	17	0	Benign
Easy to Hard	1013	<img src ='img/train/lentigo-32.jpg' class = 'block-center rotate180'>	Training12	18	0	Benign
Easy to Hard	1013	<img src ='img/train/lentigo-4.jpg' class = 'block-center rotate0'>	Training12	19	0	Benign
Easy to Hard	1013	<img src ='img/train/blue-nevus-8.jpg' class = 'block-center rotate0'>	Training12	20	1	Benign
Easy to Hard	1013	<img src ='img/train/lentigo-14.jpg' class = 'block-center rotate180'>	Training12	21	0	Benign
Easy to Hard	1013	<img src ='img/train/superficial-spreading-23.jpg' class = 'block-center rotate90'>	Training12	22	1	Melanoma
Easy to Hard	1013	<img src ='img/train/acral-lentiginous-3.jpg' class = 'block-center rotate90'>	Training12	23	1	Melanoma
Easy to Hard	1013	<img src ='img/train/blue-nevus-32.jpg' class = 'block-center rotate270'>	Training12	24	1	Benign
Easy to Hard	1013	<img src ='img/train/lentigo-magligna-7.jpg' class = 'block-center rotate180'>	Training12	25	1	Melanoma
Easy to Hard	1013	<img src ='img/train/nodular-5.jpg' class = 'block-center rotate0'>	Training12	26	1	Melanoma
Easy to Hard	1013	<img src ='img/train/lentigo-12.jpg' class = 'block-center rotate270'>	Training12	27	0	Benign
Easy to Hard	1013	<img src ='img/train/lentigo-magligna-32.jpg' class = 'block-center rotate270'>	Training12	28	1	Melanoma
Easy to Hard	1013	<img src ='img/train/nodular-21.jpg' class = 'block-center rotate0'>	Training12	29	1	Melanoma
Easy to Hard	1013	<img src ='img/train/superficial-spreading-14.jpg' class = 'block-center rotate0'>	Training12	30	0	Melanoma
Easy to Hard	1013	<img src ='img/train/nodular-40.jpg' class = 'block-center rotate0'>	Training12	31	0	Melanoma
Easy to Hard	1013	<img src ='img/train/acral-lentiginous-8.jpg' class = 'block-center rotate90'>	Training12	32	1	Melanoma
Easy to Hard	1013	img/test/nodular-3.jpg	posttest	1	1	Melanoma
Easy to Hard	1013	img/test/melancocytic-nevi-39.jpg	posttest	2	1	Benign
Easy to Hard	1013	img/test/nodular-4.jpg	posttest	3	0	Melanoma
Easy to Hard	1013	img/test/blue-nevus-1.jpg	posttest	4	1	Benign
Easy to Hard	1013	img/test/lentigo-magligna-24.jpg	posttest	5	1	Melanoma
Easy to Hard	1013	img/test/seborrheic-keratoses-27.jpg	posttest	6	1	Benign
Easy to Hard	1013	img/test/acral-lentiginous-2.gif	posttest	7	1	Melanoma
Easy to Hard	1013	img/test/melancocytic-nevi-6.jpg	posttest	8	1	Benign
Easy to Hard	1013	img/test/superficial-spreading-22.jpg	posttest	9	1	Melanoma
Easy to Hard	1013	img/test/lentigo-36.jpg	posttest	10	0	Benign
Easy to Hard	1013	img/test/acral-lentiginous-40.jpg	posttest	11	1	Melanoma
Easy to Hard	1013	img/test/seborrheic-keratoses-17.jpg	posttest	12	0	Benign
Easy to Hard	1013	img/test/melancocytic-nevi-21.jpg	posttest	13	1	Benign
Easy to Hard	1013	img/test/blue-nevus-27.jpg	posttest	14	1	Benign
Easy to Hard	1013	img/test/lentigo-magligna-5.jpg	posttest	15	1	Melanoma
Easy to Hard	1013	img/test/lentigo-20.jpg	posttest	16	1	Benign
Easy to Hard	1013	img/test/acral-lentiginous-15.jpg	posttest	17	1	Melanoma
Easy to Hard	1013	img/test/acral-lentiginous-6.jpg	posttest	18	1	Melanoma
Easy to Hard	1013	img/test/blue-nevus-12.jpg	posttest	19	1	Benign
Easy to Hard	1013	img/test/nodular-24.jpg	posttest	20	0	Melanoma
Easy to Hard	1013	img/test/blue-nevus-4.jpg	posttest	21	1	Benign
Easy to Hard	1013	img/test/superficial-spreading-28.jpg	posttest	22	1	Melanoma
Easy to Hard	1013	img/test/acral-lentiginous-34.jpg	posttest	23	1	Melanoma
Easy to Hard	1013	img/test/superficial-spreading-31.jpg	posttest	24	1	Melanoma
Easy to Hard	1013	img/test/melancocytic-nevi-16.jpg	posttest	25	1	Benign
Easy to Hard	1013	img/test/nodular-34.jpg	posttest	26	0	Melanoma
Easy to Hard	1013	img/test/seborrheic-keratoses-31.jpg	posttest	27	0	Benign
Easy to Hard	1013	img/test/blue-nevus-34.jpg	posttest	28	1	Benign
Easy to Hard	1013	img/test/lentigo-magligna-22.jpg	posttest	29	1	Melanoma
Easy to Hard	1013	img/test/lentigo-magligna-11.jpg	posttest	30	1	Melanoma
Easy to Hard	1013	img/test/nodular-17.jpg	posttest	31	0	Melanoma
Easy to Hard	1013	img/test/acral-lentiginous-11.jpg	posttest	32	0	Melanoma
Easy to Hard	1013	img/test/lentigo-3.jpg	posttest	33	0	Benign
Easy to Hard	1013	img/test/melancocytic-nevi-14.jpg	posttest	34	1	Benign
Easy to Hard	1013	img/test/seborrheic-keratoses-6.jpg	posttest	35	0	Benign
Easy to Hard	1013	img/test/nodular-25.jpg	posttest	36	1	Melanoma
Easy to Hard	1013	img/test/superficial-spreading-15.jpg	posttest	37	0	Melanoma
Easy to Hard	1013	img/test/seborrheic-keratoses-25.jpg	posttest	38	0	Benign
Easy to Hard	1013	img/test/blue-nevus-15.jpg	posttest	39	1	Benign
Easy to Hard	1013	img/test/lentigo-26.jpg	posttest	40	0	Benign
Easy to Hard	1013	img/test/melancocytic-nevi-2.jpg	posttest	41	1	Benign
Easy to Hard	1013	img/test/lentigo-magligna-19.jpg	posttest	42	1	Melanoma
Easy to Hard	1013	img/test/lentigo-17.jpg	posttest	43	1	Benign
Easy to Hard	1013	img/test/lentigo-magligna-18.jpg	posttest	44	1	Melanoma
Easy to Hard	1013	img/test/superficial-spreading-39.jpg	posttest	45	1	Melanoma
Easy to Hard	1013	img/test/superficial-spreading-13.jpg	posttest	46	0	Melanoma
Easy to Hard	1013	img/test/lentigo-8.jpg	posttest	47	1	Benign
Easy to Hard	1013	img/test/seborrheic-keratoses-7.jpg	posttest	48	1	Benign
Hard to Easy	2022	img/test/seborrheic-keratoses-17.jpg	pretest	1	0	Benign
Hard to Easy	2022	img/test/lentigo-magligna-22.jpg	pretest	2	1	Melanoma
Hard to Easy	2022	img/test/nodular-3.jpg	pretest	3	1	Melanoma
Hard to Easy	2022	img/test/blue-nevus-34.jpg	pretest	4	1	Benign
Hard to Easy	2022	img/test/blue-nevus-1.jpg	pretest	5	1	Benign
Hard to Easy	2022	img/test/acral-lentiginous-40.jpg	pretest	6	1	Melanoma
Hard to Easy	2022	img/test/blue-nevus-4.jpg	pretest	7	0	Benign
Hard to Easy	2022	img/test/blue-nevus-12.jpg	pretest	8	1	Benign
Hard to Easy	2022	img/test/melancocytic-nevi-39.jpg	pretest	9	1	Benign
Hard to Easy	2022	img/test/acral-lentiginous-2.gif	pretest	10	1	Melanoma
Hard to Easy	2022	img/test/melancocytic-nevi-6.jpg	pretest	11	1	Benign
Hard to Easy	2022	img/test/lentigo-magligna-18.jpg	pretest	12	0	Melanoma
Hard to Easy	2022	img/test/lentigo-26.jpg	pretest	13	1	Benign
Hard to Easy	2022	img/test/nodular-34.jpg	pretest	14	0	Melanoma
Hard to Easy	2022	img/test/melancocytic-nevi-14.jpg	pretest	15	1	Benign
Hard to Easy	2022	img/test/melancocytic-nevi-21.jpg	pretest	16	0	Benign
Hard to Easy	2022	img/test/lentigo-36.jpg	pretest	17	1	Benign
Hard to Easy	2022	img/test/lentigo-magligna-19.jpg	pretest	18	0	Melanoma
Hard to Easy	2022	img/test/lentigo-magligna-11.jpg	pretest	19	1	Melanoma
Hard to Easy	2022	img/test/seborrheic-keratoses-27.jpg	pretest	20	0	Benign
Hard to Easy	2022	img/test/superficial-spreading-22.jpg	pretest	21	0	Melanoma
Hard to Easy	2022	img/test/melancocytic-nevi-16.jpg	pretest	22	0	Benign
Hard to Easy	2022	img/test/acral-lentiginous-34.jpg	pretest	23	1	Melanoma
Hard to Easy	2022	img/test/seborrheic-keratoses-7.jpg	pretest	24	0	Benign
Hard to Easy	2022	img/test/superficial-spreading-15.jpg	pretest	25	0	Melanoma
Hard to Easy	2022	img/test/lentigo-8.jpg	pretest	26	1	Benign
Hard to Easy	2022	img/test/superficial-spreading-28.jpg	pretest	27	0	Melanoma
Hard to Easy	2022	img/test/superficial-spreading-31.jpg	pretest	28	1	Melanoma
Hard to Easy	2022	img/test/superficial-spreading-39.jpg	pretest	29	1	Melanoma
Hard to Easy	2022	img/test/nodular-24.jpg	pretest	30	1	Melanoma
Hard to Easy	2022	img/test/lentigo-3.jpg	pretest	31	1	Benign
Hard to Easy	2022	img/test/melancocytic-nevi-2.jpg	pretest	32	1	Benign
Hard to Easy	2022	img/test/lentigo-17.jpg	pretest	33	1	Benign
Hard to Easy	2022	img/test/lentigo-20.jpg	pretest	34	1	Benign
Hard to Easy	2022	img/test/blue-nevus-15.jpg	pretest	35	0	Benign
Hard to Easy	2022	img/test/superficial-spreading-13.jpg	pretest	36	1	Melanoma
Hard to Easy	2022	img/test/blue-nevus-27.jpg	pretest	37	0	Benign
Hard to Easy	2022	img/test/nodular-25.jpg	pretest	38	1	Melanoma
Hard to Easy	2022	img/test/acral-lentiginous-11.jpg	pretest	39	1	Melanoma
Hard to Easy	2022	img/test/acral-lentiginous-6.jpg	pretest	40	0	Melanoma
Hard to Easy	2022	img/test/acral-lentiginous-15.jpg	pretest	41	1	Melanoma
Hard to Easy	2022	img/test/seborrheic-keratoses-25.jpg	pretest	42	0	Benign
Hard to Easy	2022	img/test/nodular-4.jpg	pretest	43	1	Melanoma
Hard to Easy	2022	img/test/nodular-17.jpg	pretest	44	1	Melanoma
Hard to Easy	2022	img/test/lentigo-magligna-24.jpg	pretest	45	0	Melanoma
Hard to Easy	2022	img/test/seborrheic-keratoses-6.jpg	pretest	46	1	Benign
Hard to Easy	2022	img/test/lentigo-magligna-5.jpg	pretest	47	0	Melanoma
Hard to Easy	2022	img/test/seborrheic-keratoses-31.jpg	pretest	48	1	Benign
Hard to Easy	2022	<img src ='img/train/nodular-37.jpg' class = 'block-center rotate0'>	Training1	1	0	Melanoma
Hard to Easy	2022	<img src ='img/train/nodular-5.jpg' class = 'block-center rotate90'>	Training1	2	1	Melanoma
Hard to Easy	2022	<img src ='img/train/melancocytic-nevi-5.jpg' class = 'block-center rotate180'>	Training1	3	1	Benign
Hard to Easy	2022	<img src ='img/train/lentigo-4.jpg' class = 'block-center rotate90'>	Training1	4	1	Benign
Hard to Easy	2022	<img src ='img/train/nodular-41.jpg' class = 'block-center rotate270'>	Training1	5	1	Melanoma
Hard to Easy	2022	<img src ='img/train/nodular-21.jpg' class = 'block-center rotate180'>	Training1	6	1	Melanoma
Hard to Easy	2022	<img src ='img/train/seborrheic-keratoses-32.png' class = 'block-center rotate180'>	Training1	7	1	Benign
Hard to Easy	2022	<img src ='img/train/blue-nevus-8.jpg' class = 'block-center rotate270'>	Training1	8	0	Benign
Hard to Easy	2022	<img src ='img/train/lentigo-34.jpg' class = 'block-center rotate270'>	Training1	9	1	Benign
Hard to Easy	2022	<img src ='img/train/melancocytic-nevi-38.jpg' class = 'block-center rotate90'>	Training1	10	1	Benign
Hard to Easy	2022	<img src ='img/train/nodular-40.jpg' class = 'block-center rotate90'>	Training1	11	1	Melanoma
Hard to Easy	2022	<img src ='img/train/blue-nevus-33.jpg' class = 'block-center rotate270'>	Training1	12	0	Benign
Hard to Easy	2022	<img src ='img/train/lentigo-magligna-7.jpg' class = 'block-center rotate180'>	Training1	13	0	Melanoma
Hard to Easy	2022	<img src ='img/train/acral-lentiginous-29.jpg' class = 'block-center rotate180'>	Training1	14	0	Melanoma
Hard to Easy	2022	<img src ='img/train/acral-lentiginous-3.jpg' class = 'block-center rotate90'>	Training1	15	1	Melanoma
Hard to Easy	2022	<img src ='img/train/lentigo-14.jpg' class = 'block-center rotate270'>	Training1	16	0	Benign
Hard to Easy	2022	<img src ='img/train/blue-nevus-32.jpg' class = 'block-center rotate180'>	Training1	17	0	Benign
Hard to Easy	2022	<img src ='img/train/lentigo-12.jpg' class = 'block-center rotate0'>	Training1	18	1	Benign
Hard to Easy	2022	<img src ='img/train/lentigo-magligna-32.jpg' class = 'block-center rotate90'>	Training1	19	0	Melanoma
Hard to Easy	2022	<img src ='img/train/blue-nevus-36.jpg' class = 'block-center rotate270'>	Training1	20	0	Benign
Hard to Easy	2022	<img src ='img/train/lentigo-magligna-37.jpg' class = 'block-center rotate270'>	Training1	21	0	Melanoma
Hard to Easy	2022	<img src ='img/train/lentigo-magligna-40.jpg' class = 'block-center rotate0'>	Training1	22	1	Melanoma
Hard to Easy	2022	<img src ='img/train/seborrheic-keratoses-37.jpg' class = 'block-center rotate0'>	Training1	23	0	Benign
Hard to Easy	2022	<img src ='img/train/superficial-spreading-14.jpg' class = 'block-center rotate180'>	Training1	24	0	Melanoma
Hard to Easy	2022	<img src ='img/train/lentigo-31.jpg' class = 'block-center rotate180'>	Training1	25	0	Benign
Hard to Easy	2022	<img src ='img/train/superficial-spreading-23.jpg' class = 'block-center rotate90'>	Training1	26	1	Melanoma
Hard to Easy	2022	<img src ='img/train/nodular-16.jpg' class = 'block-center rotate0'>	Training1	27	1	Melanoma
Hard to Easy	2022	<img src ='img/train/seborrheic-keratoses-28.jpg' class = 'block-center rotate90'>	Training1	28	0	Benign
Hard to Easy	2022	<img src ='img/train/acral-lentiginous-8.jpg' class = 'block-center rotate270'>	Training1	29	1	Melanoma
Hard to Easy	2022	<img src ='img/train/blue-nevus-18.jpg' class = 'block-center rotate90'>	Training1	30	1	Benign
Hard to Easy	2022	<img src ='img/train/lentigo-32.jpg' class = 'block-center rotate270'>	Training1	31	0	Benign
[truncated: 30,257 more rows]
